# Supplementary material for: (Z)-Selective anti-Markovnikov or Markovnikov thiol–yne-click reactions of an internal alkyne by amide hydrogen bond control
Source: Royal Society of Chemistry journal article supplement (doi:10.1039/d0cc00702a), 2020-01-01
Supplement: d0cc00702a1.pdf [file d0cc00702a1.pdf]

*Supporting Information*

**(Z)-Selective *anti*-Markovnikov or Markovnikov Thiol-Yne-Click Reactions of an  
Internal Alkyne by Amide Hydrogen Bond Control**

**Content**

|                                              |         |
|----------------------------------------------|---------|
| General Information                          | S2      |
| Synthesis and Reaction Optimization          | S2-S3   |
| Crystallographic Data                        | S4-S7   |
| NMR and EPR analysis                         | S7-S8   |
| Structure elucidation of compound <b>3ak</b> | S9-S16  |
| Compound characterization data               | S16-S35 |
| References                                   | S36     |
| NMR spectra                                  | S37-S88 |

## EXPERIMENTAL SECTION

**General Aspects.** All the chemicals were purchased from the commercial sources and used as received. All the reactions were generally carried out under open atmosphere unless otherwise noted. The reactions were monitored by TLC on aluminium sheets pre-coated with silica gel. Chromatographic purifications of the compounds were performed using silica gel (Mess 230-400) and ethyl acetate/hexane as an eluent.  $^1\text{H}$  and  $^{13}\text{C}$  spectra of the compounds were recorded on Bruker 400 and 700 MHz instrument at 25 °C. The chemical shift value ( $\delta$ , ppm) were reported with respect to the residual chloroform (7.26 for  $^1\text{H}$  and 77.16 ppm for  $^{13}\text{C}$ ). Mass spectra were recorded as ESI-TOF (HRMS). Infrared spectra were recorded on neat solids using KBr pellets and described in wave number ( $\text{cm}^{-1}$ ). Digital melting point apparatus were used to record the Melting Point of the compound in degree centigrade (°C) and are uncorrected.

### Synthesis

#### General procedures for the synthesis of N,3-diphenylpropiolamide derivatives.

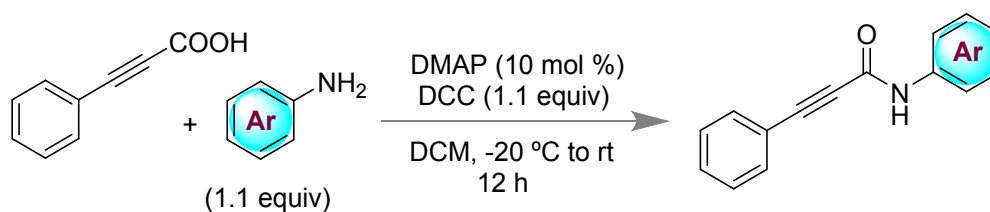

**Scheme S1**

In an oven dried round bottomed flask, a solution of propionic acid (3.54 mmol, 1.1 equiv) in 10 mL  $\text{CH}_2\text{Cl}_2$  was stirred at -20 °C and 4-dimethylaminopyridine (0.32 mmol, 0.1 equiv), dicyclohexylcarbodiimide (3.54 mmol, 1.1 equiv) in 5 mL  $\text{CH}_2\text{Cl}_2$  were injected drop wise. Then a solution of aniline derivatives (3.22 mmol, 1.0 equiv) in 5 mL  $\text{CH}_2\text{Cl}_2$  was then added drop wise. Afterwards, the reaction mixture was allowed to stir at room temperature for 12 h.

After completion, the reaction mixture was diluted in CH<sub>2</sub>Cl<sub>2</sub> and following organic content was washed 3 times by 0.5 M aq. HCl, dried over Na<sub>2</sub>SO<sub>4</sub>, and concentrated under reduced pressure. The crude residue was purified by a silica gel column chromatography to give the corresponding desired starting materials N,3-diphenylpropiolamide derivatives as solid.

**Procedure for the Thiol Yne Click reaction and representative synthesis of 3aa.** The compound (**1a**) (60 mg, 0.271 mmol) was taken in a round bottom flask and followed by thiophenol (**2a**) (89 mg, 0.813 mmol) was added dropwise at open atmosphere. Following, the reaction mixture stirred for 30 min while monitored by TLC (*for solid-solid component, few drops of EtOH was added to make the reaction mixture homogeneous*). After completion of the reaction, column chromatography was done in EtOAC/Hexane to isolate the desired product **3aa** and to recover excess thiol (~1.5 equiv).

**Optimization Reaction Condition (Table S1):**

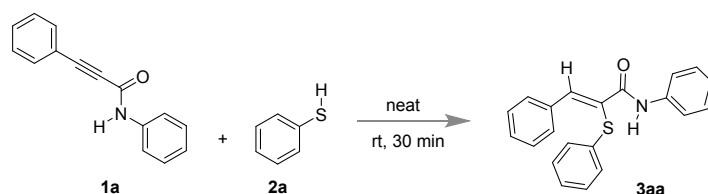

| Entry | Thiol (equiv) | Solvent           | Yield (%) <sup>a</sup> |
|-------|---------------|-------------------|------------------------|
| 1     | 1             | -                 | 50                     |
| 2     | 1.5           | -                 | 68                     |
| 3     | 2             | -                 | 81                     |
| 4     | 3             | -                 | 97                     |
| 5     | 3             | EtOH              | 82                     |
| 6     | 3             | H <sub>2</sub> O  | 86                     |
| 7     | 3             | CHCl <sub>3</sub> | 40                     |
| 8     | 3             | DMSO              | 59                     |
| 9     | 3             | Toluene           | 27                     |
| 10    | 3             | -                 | 93 <sup>b</sup>        |

<sup>a</sup>Isolated yields after column chromatography; Reaction conditions: **1a** (0.271 mmol), **2a** (0.813 mmol), room temperature, 30 min. <sup>b</sup>Reaction was performed under inert atmosphere.

## Crystallographic Investigation

The compound (**3aa**) was recrystallized by the slow evaporation of ethanol and water mixture (ca. 50%). The crystals data were collected with Bruker SMART D8 goniometer equipped with an APEX CCD detector and with an INCOATEC micro source (Cu-K $\alpha$  radiation,  $\lambda = 1.54184 \text{ \AA}$ ). SAINT<sup>+1</sup> and SADABS<sup>2</sup> were used to integrate the intensities and to correct the absorption respectively. The structure was resolved by direct methods and refined on F<sup>2</sup> with SHELXL-97.<sup>3</sup>

### Compound (**3aa**) (CCDC 1910745)

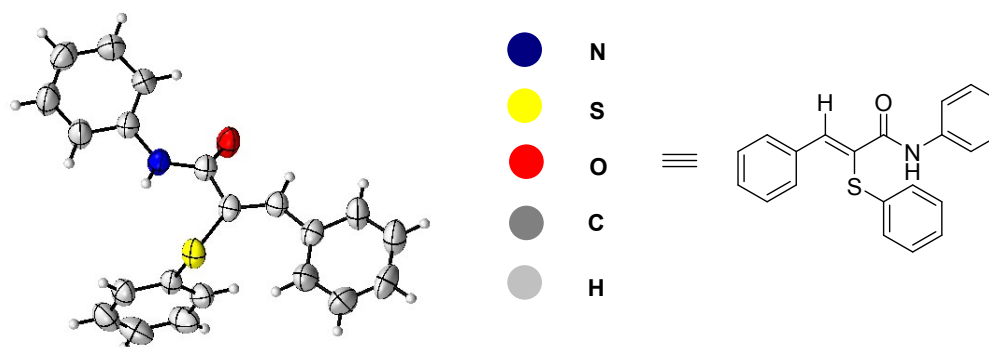

Fig. S1. Crystal structure of (**3aa**) (CCDC 1910745).

### Crystallographic Data for (**3aa**)

|                   |                                     |
|-------------------|-------------------------------------|
| Empirical formula | C <sub>21</sub> H <sub>17</sub> NOS |
| Formula weight    | 331.43                              |
| Temperature/K     | 299                                 |
| Crystal system    | Orthorhombic                        |
| Space group       | Pca2 <sub>1</sub>                   |
| a/Å               | 16.2527(7)                          |
| b/Å               | 5.8894(2)                           |
| c/Å               | 18.0008(7)                          |

|                                               |                                                                  |
|-----------------------------------------------|------------------------------------------------------------------|
| $\alpha/^\circ$                               | 90                                                               |
| $\beta/^\circ$                                | 90                                                               |
| $\gamma/^\circ$                               | 90                                                               |
| Volume/ $\text{\AA}^3$                        | 1723.01(12)                                                      |
| Z                                             | 4                                                                |
| $\rho_{\text{calc}}/\text{g/cm}^3$            | 1.213                                                            |
| $\mu/\text{mm}^{-1}$                          | 1.703                                                            |
| F(000)                                        | 629.0                                                            |
| Crystal size/ $\text{mm}^3$                   | 0.2 $\times$ 0.2 $\times$ 0.18                                   |
| Radiation                                     | CuK $\alpha$ ( $\lambda = 1.54184$ )                             |
| Reflections collected                         | 13559                                                            |
| Independent reflections                       | 3374 [ $R_{\text{int}} = 0.1472$ , $R_{\text{sigma}} = 0.0660$ ] |
| Goodness-of-fit on $F^2$                      | 1.082                                                            |
| Final R indexes [ $I \geq 2\sigma(I)$ ]       | $R_1 = 0.0648$ , $wR_2 = 0.1754$                                 |
| Final R indexes [all data]                    | $R_1 = 0.0703$ , $wR_2 = 0.1855$                                 |
| Largest diff. peak/hole / $e \text{\AA}^{-3}$ | 0.58/-0.47                                                       |

### Compound 7 (CCDC 1965122)

The compound **7** was crystallized directly from the reaction mixture of compound **6** and (**2f**) in EtOH. The crystals data were collected with Bruker SMART D8 goniometer equipped with an APEX CCD detector and with an INCOATEC micro source (Mo-K $\alpha$  radiation,  $\lambda = 0.71073 \text{\AA}$ ). SAINT<sup>4</sup> and SADABS<sup>5</sup> were used to integrate the intensities and to correct the absorption respectively. The structure was resolved by direct methods and refined on  $F^2$  with SHELXL-97.

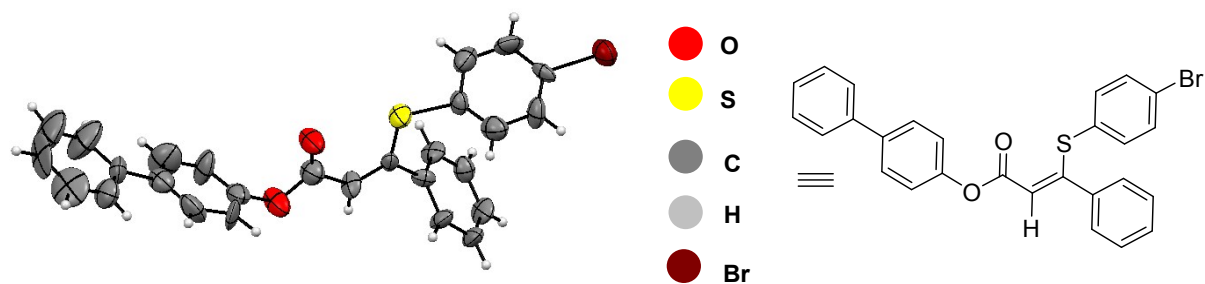

Fig. S2. Crystal structure of compound 7 (CCDC 1965122).

### Crystallographic Data for compound 7

|                                  |                                      |
|----------------------------------|--------------------------------------|
| Empirical formula                | $C_{27}H_{19}BrO_2S$                 |
| Formula weight                   | 487.41                               |
| Temperature/K                    | 296                                  |
| Crystal system                   | Triclinic                            |
| Space group                      | P-1                                  |
| a/Å                              | 6.5137(5)                            |
| b/Å                              | 22.7108(19)                          |
| c/Å                              | 32.675(3)                            |
| $\alpha/^\circ$                  | 108.215(5)                           |
| $\beta/^\circ$                   | 93.851(5)                            |
| $\gamma/^\circ$                  | 96.920(5)                            |
| Volume/Å <sup>3</sup>            | 4529.7(7)                            |
| Z                                | 2                                    |
| $\rho_{\text{calc}}/\text{cm}^3$ | 1.427                                |
| $\mu/\text{mm}^{-1}$             | 1.928                                |
| F(000)                           | 1982.0                               |
| Crystal size/mm <sup>3</sup>     | 0.26×0.18×0.12                       |
| Radiation                        | MoK $\alpha$ ( $\lambda = 0.71073$ ) |

|                                                |                                                                   |
|------------------------------------------------|-------------------------------------------------------------------|
| Reflections collected                          | 51290                                                             |
| Independent reflections                        | 16535 [ $R_{\text{int}} = 0.1142$ , $R_{\text{sigma}} = 0.1507$ ] |
| Goodness-of-fit on $F^2$                       | 1.047                                                             |
| Final R indexes [ $I \geq 2\sigma(I)$ ]        | $R_1 = 0.1058$ , $wR_2 = 0.2309$                                  |
| Final R indexes [all data]                     | $R_1 = 0.2549$ , $wR_2 = 0.2858$                                  |
| Largest diff. peak/hole / $e \text{ \AA}^{-3}$ | 1.11/-0.71                                                        |

### NMR Experiment:

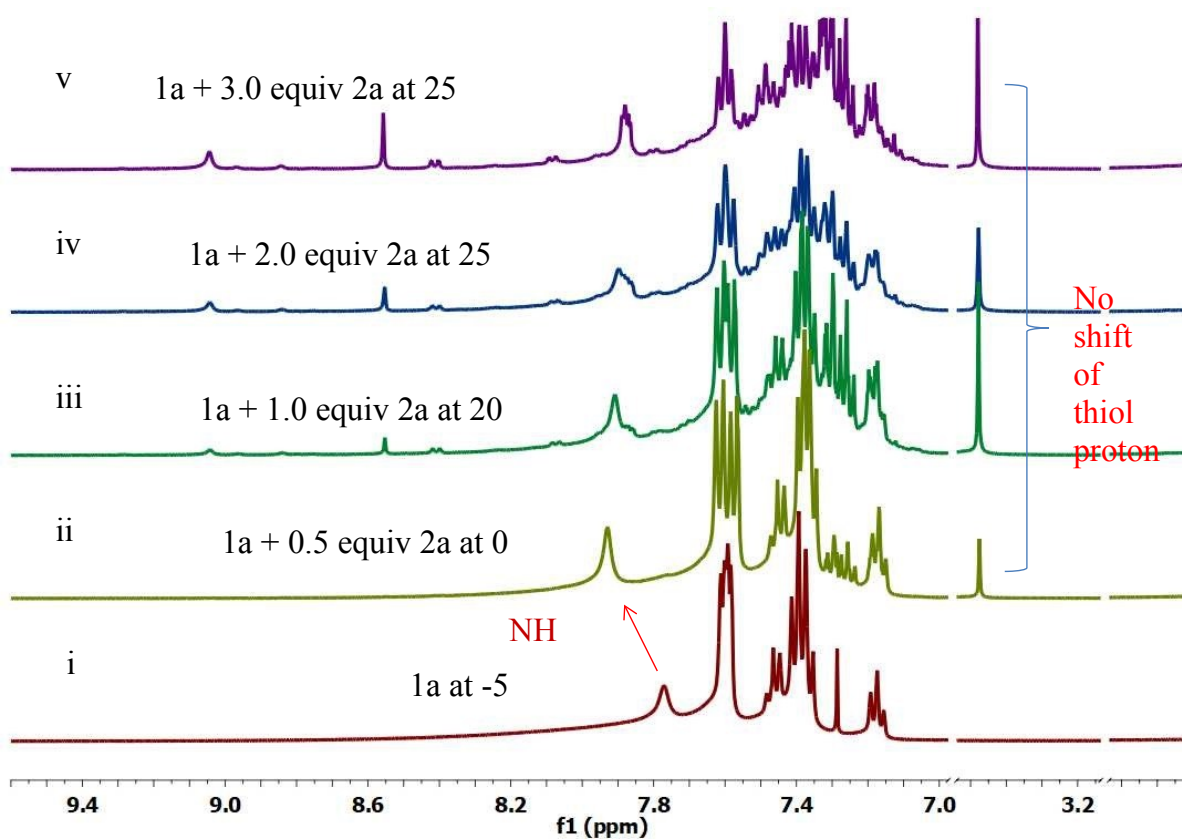

**Fig. S3.**  $^1\text{H}$  NMR spectra of reaction mixture **1a** and **2a** (i-v) in  $\text{CDCl}_3$  solvent at different temperature.

### EPR experiment:

EPR spectra was recorded at 298 K using EPR spectrometer derived at 9.4335 GHz. Typical spectrometer parameters are shown as follows, scan range: 100 G; centre field set: 3480.00 G; time constant: 0.16 ms; scan time: 122.88 s; modulation amplitude: 20.0 G; modulation frequency: 100 kHz; receiver gain:  $2.00 \times 10^2$ ; microwave power:  $7.14 \times 10^{-001}$  mW.

**Reaction of Propiolamide 1a with Thiophenol 2a in presence of DMPO under standard condition:** A mixture of propiolamide **1a** (60 mg, 0.271 mmol), thiophenol (89 mg, 0.813 mmol) and DMPO (20  $\mu$ L) were stirred for 20 minutes at room temperature. Afterwards, 20  $\mu$ L solution was quickly transferred into EPR tube and 200  $\mu$ L toluene was added to analyze EPR. No signal was observed, indicating reaction did not go through radical intermediate.

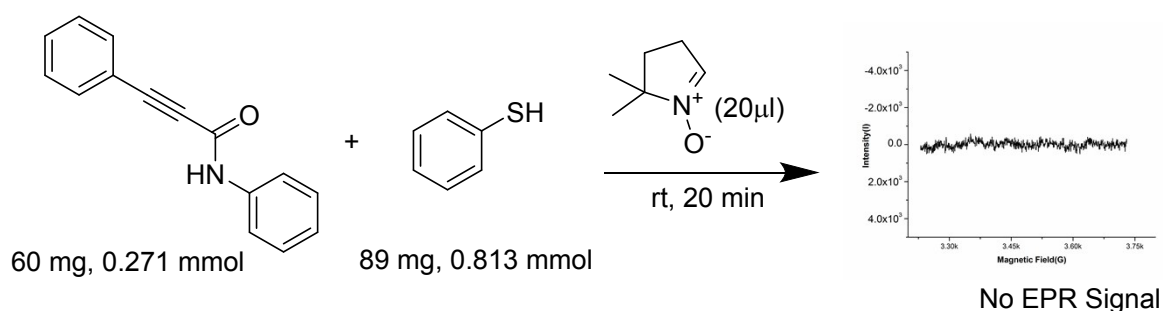

**Fig. S4.** EPR spectra of reaction mixture **1a** and **2a** in presence of spin trapping reagent DEMPO in Toluene solvent.

### Structure elucidation for Compound (3ak)

Proposed structure is as follows:

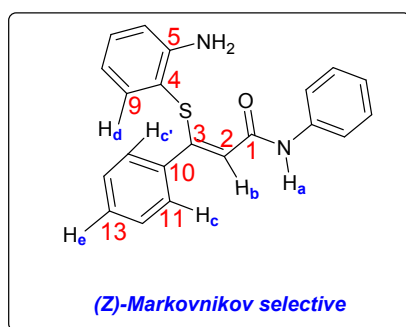



### Justification for proposed structure (3ak):

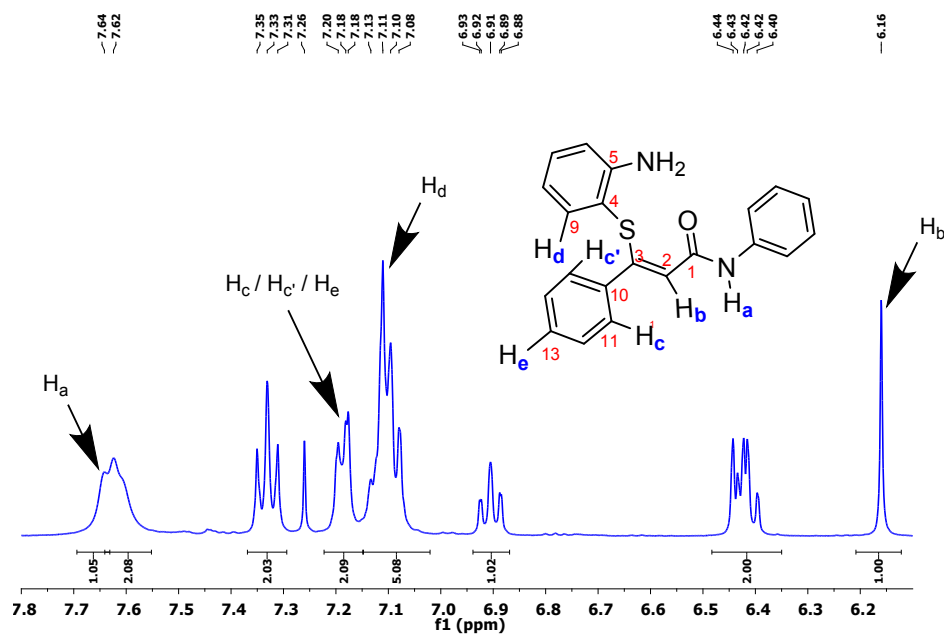

**Fig. S5.** <sup>1</sup>H NMR spectrum of Compound (3ak) with expanded aromatic region. The signature peaks are assigned through <sup>1</sup>H-<sup>13</sup>C HMBC and HSQC NMR study below.

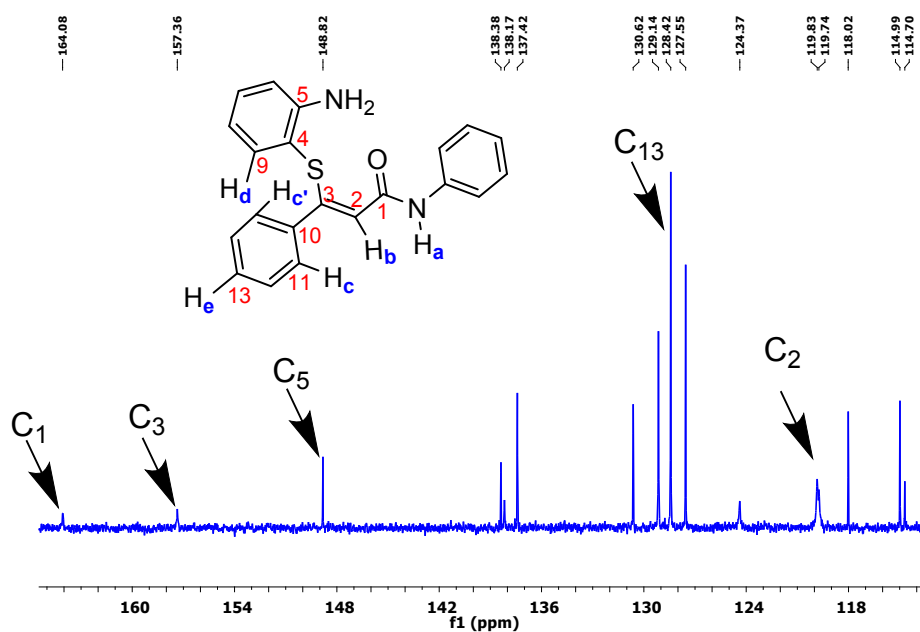

**Fig. S6.** <sup>13</sup>C NMR spectrum of Compound (3ak) with expanded aromatic region. The signature peaks are assigned through <sup>1</sup>H-<sup>13</sup>C HMBC and HSQC NMR study below.

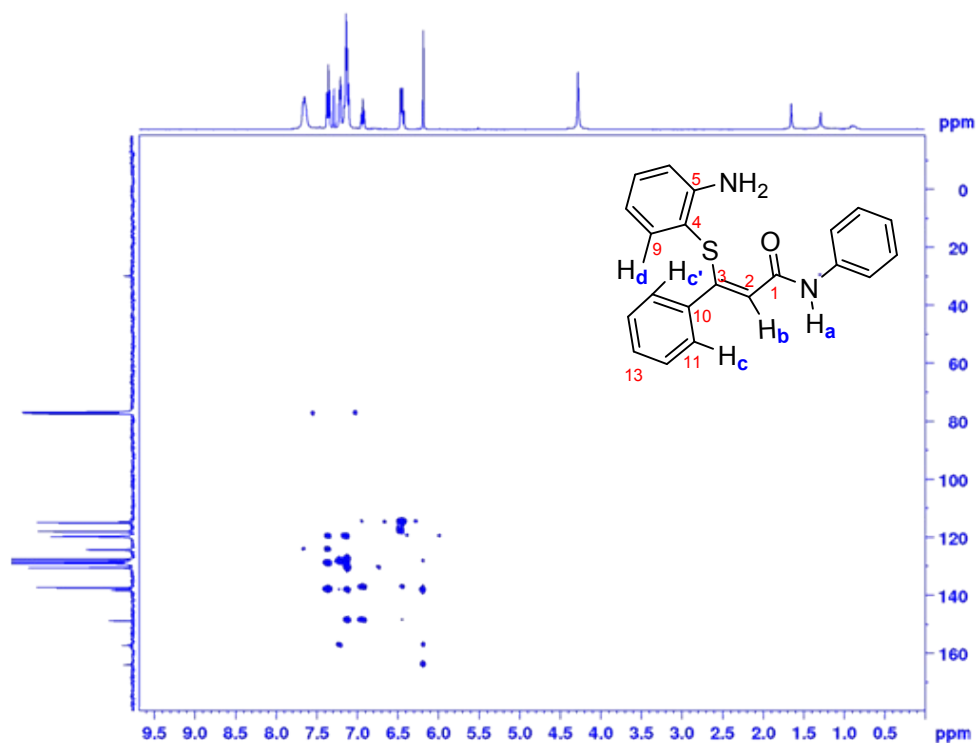

**Fig. S7.** HMBC full spectra. Number of points used along indirect and direct dimension was 256 and 2048 with a spectral width of 23900 Hz and 5200 Hz. 16 transients were recorded with a prescan delay of 3s. All the 2D NMR were recorded in CDCl<sub>3</sub> Solvent. CDCl<sub>3</sub> is not calibrated(taken as 7.284 ppm instead of 7.26 ppm).

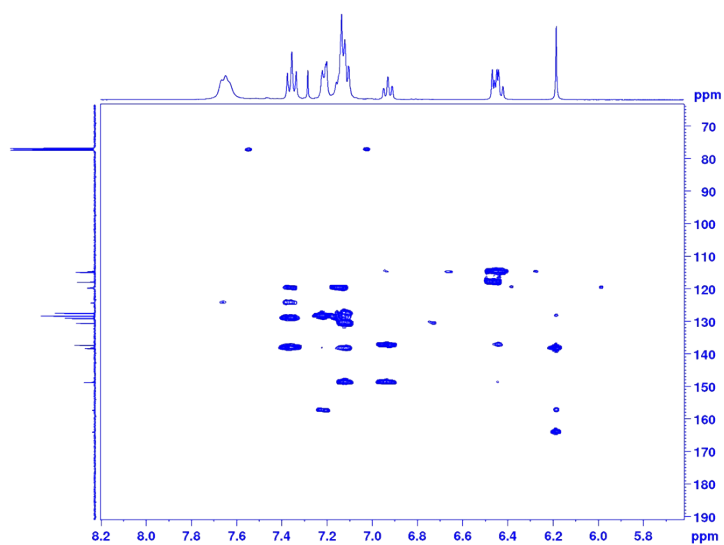

**Fig. S8.** HMBC spectra of aromatic region showing strong 3 bond correlation and very weak 2 bond correlation.

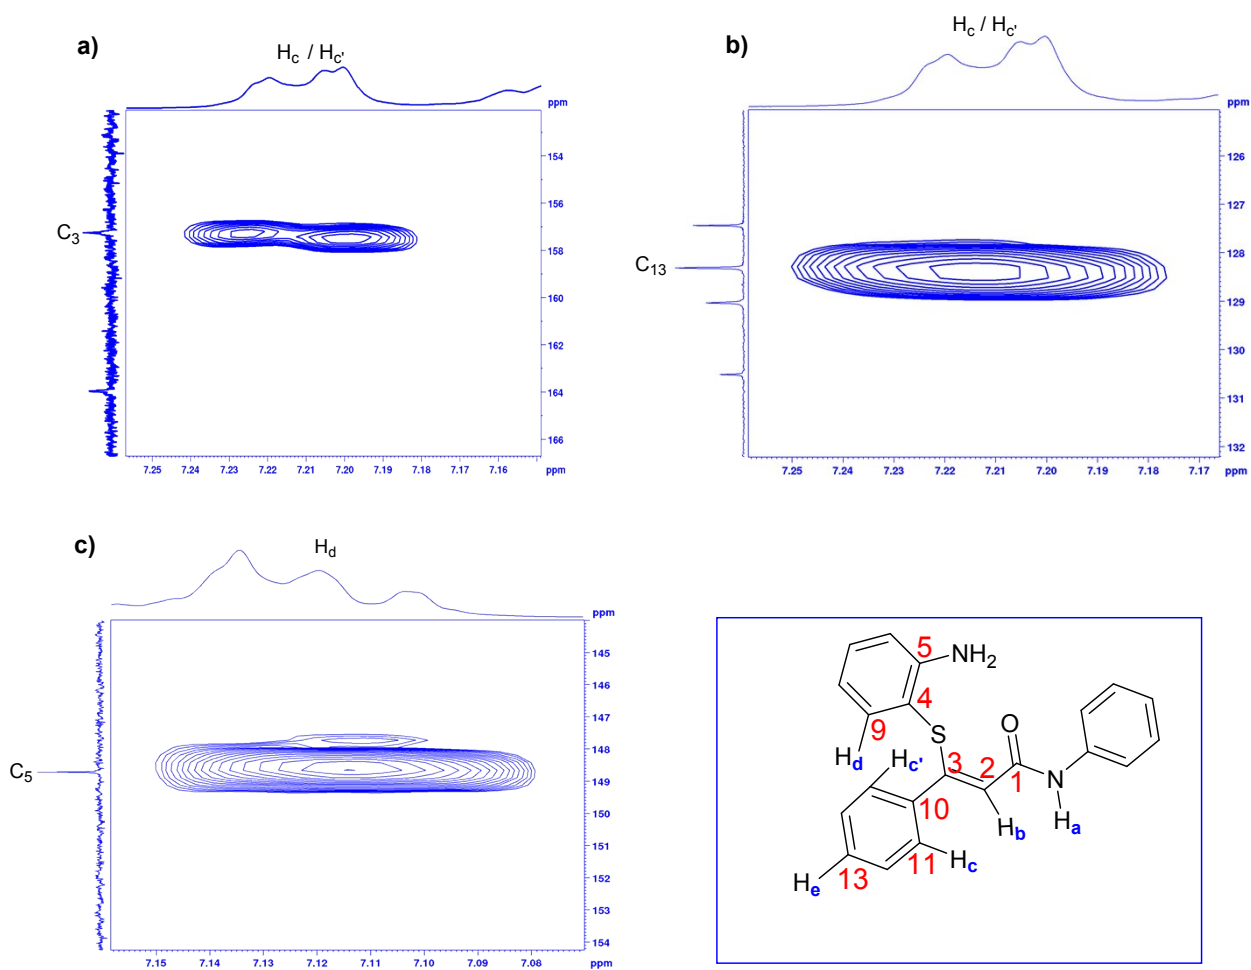

**Fig. S9.**  $^1\text{H}$ - $^{13}\text{C}$  HMBC NMR spectra having three bond correlation. **a)** Three bond correlation between  $\text{H}_c/\text{H}_{c'}$  and  $\text{C}_3$ . **b)** Three bond correlation between  $\text{H}_c/\text{H}_{c'}$  and  $\text{C}_{13}$ . **c)** Three bond correlation between  $\text{H}_d$  and  $\text{C}_5$ .

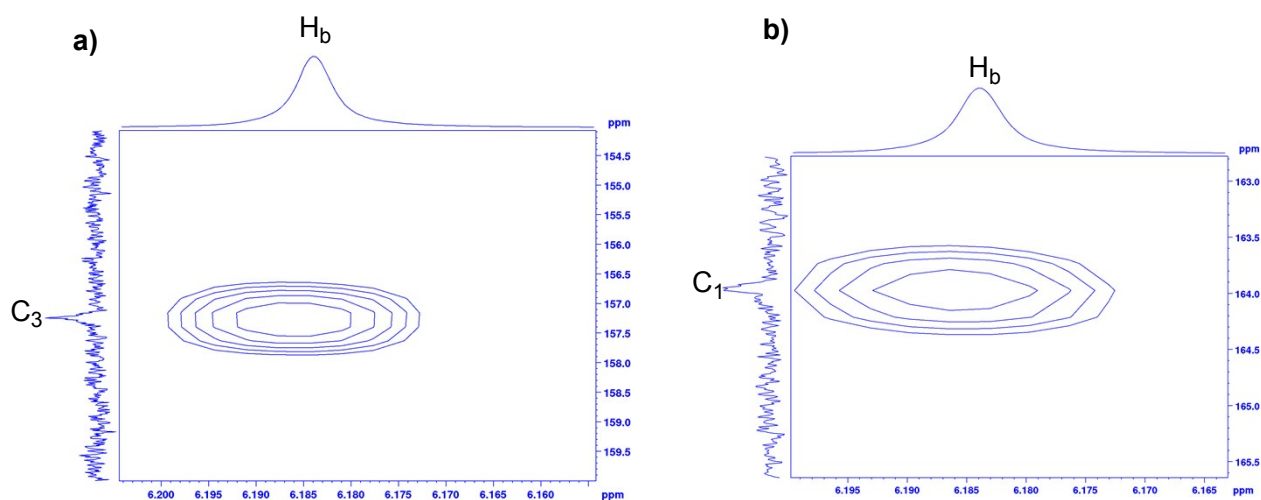

**Fig. S10.**  $^1\text{H}$ - $^{13}\text{C}$  HMBC NMR spectra with two bond correlation. **a)** Two bond correlation between  $\text{H}_b$  and  $\text{C}_3$ . **b)** Two Bond correlation between  $\text{H}_b$  and  $\text{C}_1$ .

From the above 2D HMBC assignments it can be concluded that the H<sub>c</sub>/H<sub>c'</sub>(7.2 ppm) is connected to C<sub>3</sub> (157.2 ppm) via 3 bond coupling whereas it is also connected to C<sub>13</sub>(128.2 ppm) via 3 bond coupling. Thus it can be concluded the the resonance at 7.2 ppm should come form H<sub>c</sub>/C'. C<sub>5</sub>( 148.7) shows a strong 3 bond correlation with the proton resonating at 7.1 ppm thus indicating that this corresponds to H<sub>d</sub>. H<sub>b</sub>(6.18 ppm) shows a two bond correlation with C<sub>3</sub>(157.2 ppm) and C<sub>1</sub>(163.8 ppm). Thus it is now confirmed that the carbon resonated at C<sub>3</sub> must be 157.2.

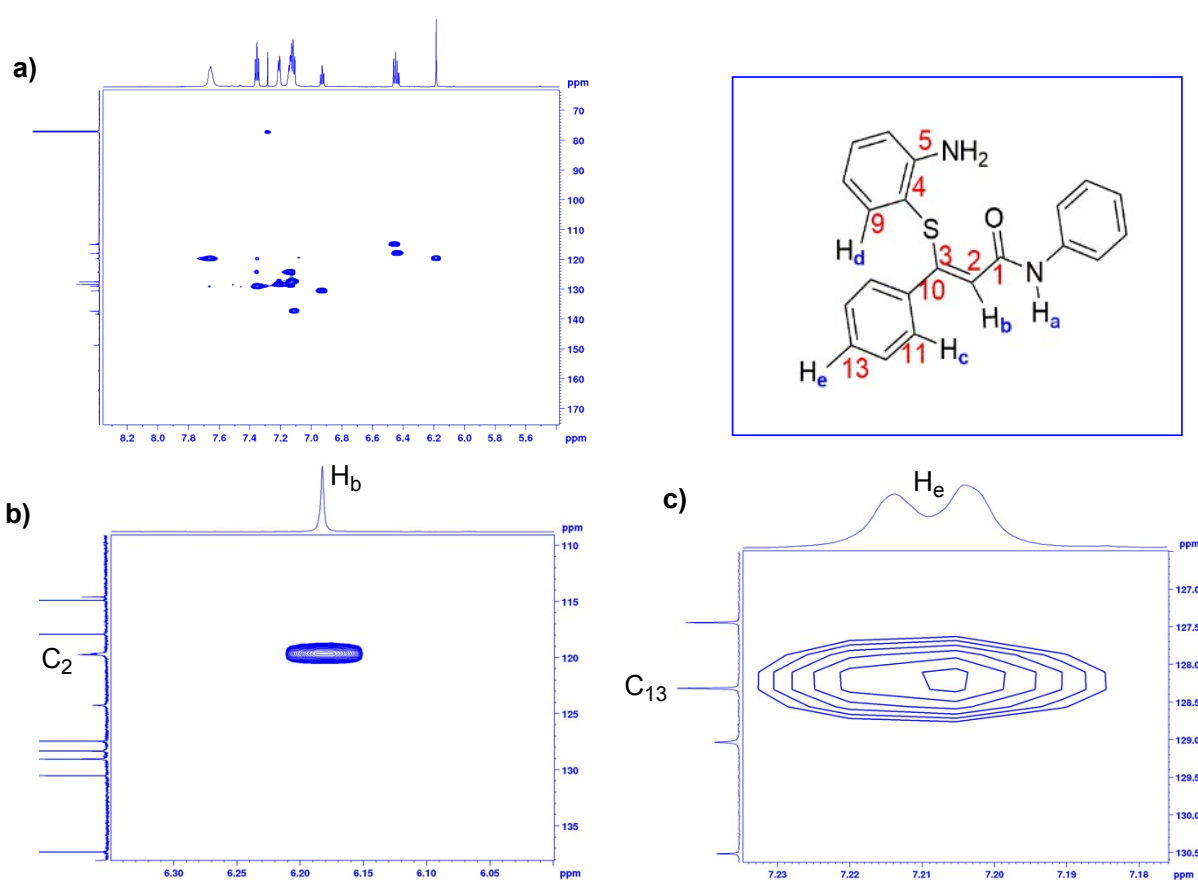

**Fig. S11.** HSQC Spectra: **a)** Expanded aromatic region. **b)** One bond correlation of H<sub>b</sub> with C<sub>2</sub>. **c)** One bond correlation of H<sub>e</sub> with C<sub>13</sub>.

From HSQC study it is observed that single bond connectivity of H<sub>b</sub> is with C<sub>2</sub>( 119.2 ppm). C<sub>13</sub> also shows a single bond correlation with H<sub>e</sub>(7.2 ppm) which further confirms that C<sub>13</sub> resonates at 128.2 ppm.

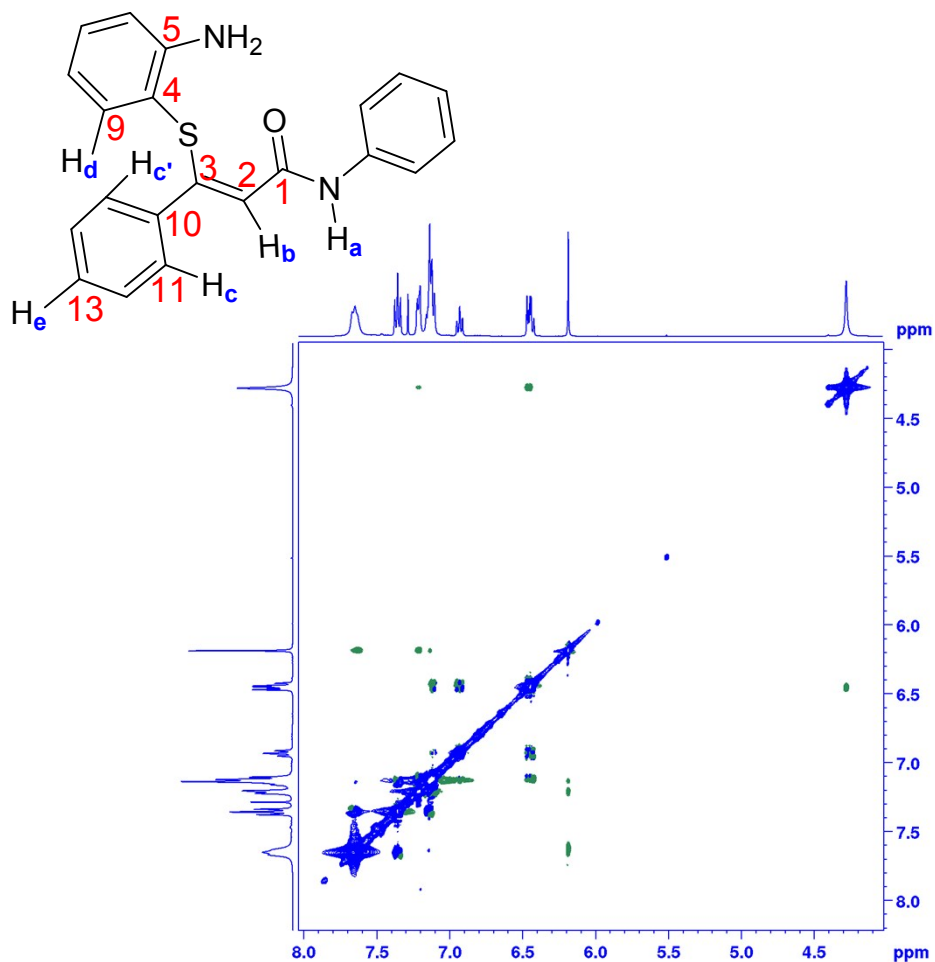

**Fig. S12.** ROESY spectra of compound **3ak**. Number of points in acquisition and indirect dimension was 2048 and 256 with spinlock pulse of duration 270ms. 8 transients with a prescan delay of 3 second was used to ensure complete relaxation. Spectral width along both indirect and direct dimension was adjusted to 4125 Hz.

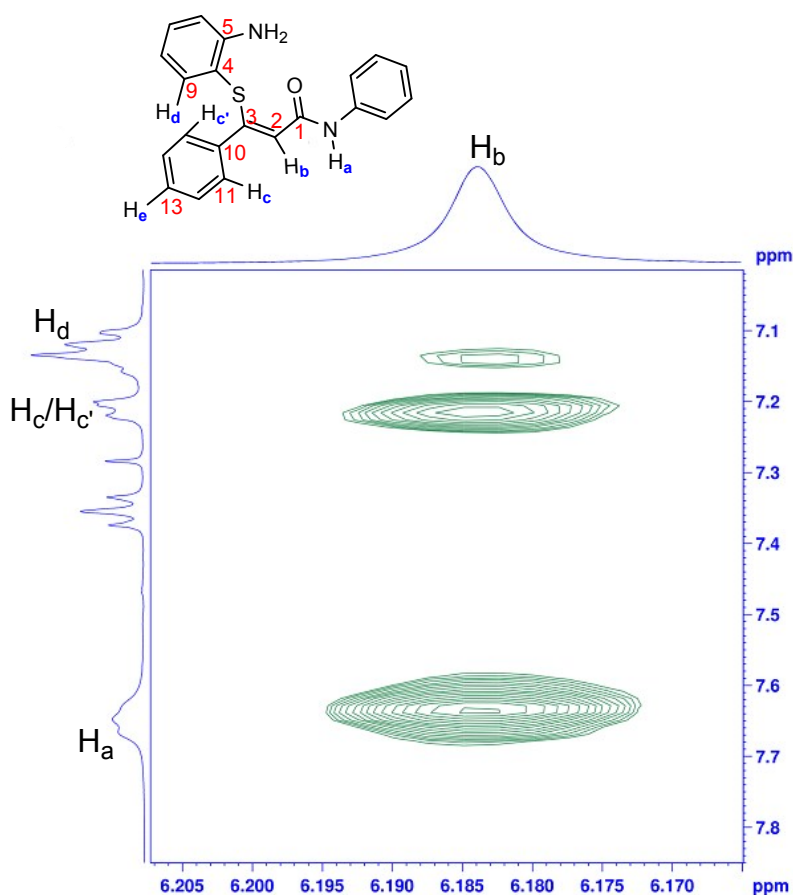

**Fig. S13.** Expanded region of the ROESY spectra.

<sup>1</sup>H-<sup>1</sup>H ROESY NMR study shows a strong correlation between H<sub>b</sub>(6.18 ppm) and H<sub>a</sub> (7.64 ppm). This confirms the Markovnikov selectivity of compound (**3ak**). On the other hand, another strong correlation of H<sub>b</sub>(6.18 ppm) with H<sub>c</sub>/H<sub>c'</sub>(7.20 ppm) is observed. It confirms the (Z)-selectivity of the compound (**3ak**). However there is a very weak interaction of H<sub>b</sub> with H<sub>d</sub>. The ratio of integrals between the two cross peaks are approximately 1:0.10.

In order to understand this interaction we have done structure optimization through DFT(B3LYP/6311G). The optimized structure is shown below.

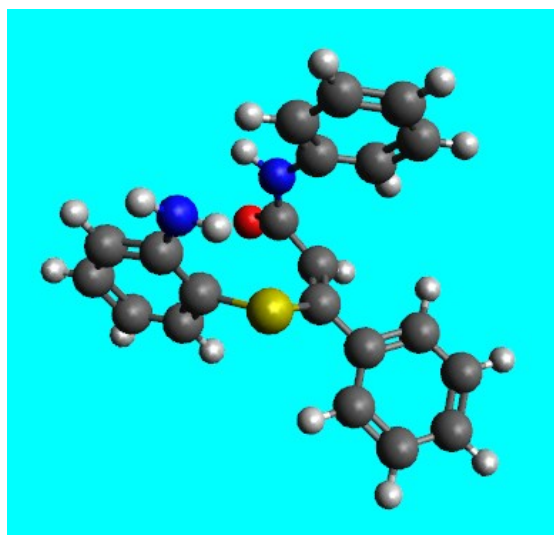

**Fig. S14.** Optimized geometry via B3LYP DFT method using 6311G basis set with quadratic convergence.

In the optimized structure it is clearly seen that the distance between H<sub>b</sub> and H<sub>d</sub> is very high (3.90 Å) compared to H<sub>b</sub> and H<sub>c</sub> (2.36 Å). As the intensity of roesy cross peaks are inversely proportional to sixth power of distance (1/r<sup>6</sup>), the intensity ratio in the present case between H<sub>b</sub>-H<sub>c</sub> and H<sub>b</sub>-H<sub>d</sub> is expected to be 1:0.06 which is close to the experimentally observed ratio of 1:0.10. This confirms exclusive formation of (Z)-selective Markovnikov product.

#### NMR CHARACTERIZATION DATA

**(Z)-N,3-diphenyl-2-(phenylthio)acrylamide (3aa):** R<sub>f</sub> = 0.6 (20% ethyl acetate in hexane);

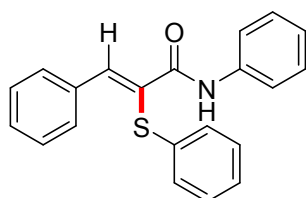

white solid; yield 97% (87 mg); mp 96-98 °C; <sup>1</sup>H NMR (700 MHz, CDCl<sub>3</sub>) δ 9.00 (s, 1H), 8.53 (s, 1H), 7.86-7.85 (m, 2H), 7.47 (d, *J* = 7.7 Hz, 2H), 7.40-7.39 (m, 3H), 7.31-7.30 (m, 3H), 7.29-7.27 (m,

3H), 7.18 (t, *J* = 7.2 Hz, 1H), 7.10 (t, *J* = 7.4 Hz, 1H); <sup>13</sup>C NMR (175 MHz, CDCl<sub>3</sub>) δ 163.7, 147.6, 137.8, 134.6, 134.3, 130.9, 130.3, 129.8, 129.1, 128.6, 127.9, 126.9, 124.8, 124.3, 120.2; IR (KBr)  $\bar{\nu}$  3347, 3057, 2924, 1674, 691; HRMS (ESI/Q-TOF) *m/z*: [M + Na]<sup>+</sup> calcd for C<sub>21</sub>H<sub>17</sub>NOSNa 354.0923; found 354.0927.

**(Z)-N,3-diphenyl-2-(p-tolylthio)acrylamide (3ab):**  $R_f = 0.7$  (20% ethyl acetate in hexane);

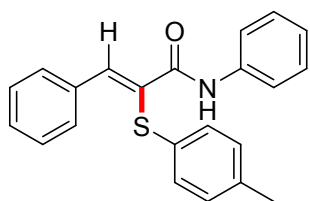

white solid; yield 98% (91 mg); mp 122-124 °C;  $^1\text{H}$  NMR (700 MHz,  $\text{CDCl}_3$ )  $\delta$  9.01 (s, 1H), 8.48 (s, 1H), 7.89-7.85 (m, 2H), 7.48 (d,  $J = 7.7$  Hz, 2H), 7.41-7.37 (m, 3H), 7.30 (t,  $J = 8.0$  Hz, 2H),

7.20 (d,  $J = 7.7$  Hz, 2H), 7.09 (t,  $J = 8.0$  Hz, 3H), 2.27 (s, 3H);  $^{13}\text{C}$  NMR (175 MHz,  $\text{CDCl}_3$ )  $\delta$  163.3, 147.1, 137.9, 137.0, 134.7, 130.9, 130.6, 130.6, 130.2, 129.1, 128.6, 127.4, 124.9, 124.7, 120.2, 21.1; IR (KBr)  $\bar{\nu}$  3344, 2923, 1667, 690; HRMS (ESI/Q-TOF)  $m/z$ :  $[\text{M} + \text{H}]^+$  calcd for  $\text{C}_{22}\text{H}_{20}\text{NOS}$  346.1260; found 346.1258.

**(Z)-2-((4-methoxyphenyl)thio)-N,3-diphenylacrylamide (3ac):**  $R_f = 0.5$  (20% ethyl acetate

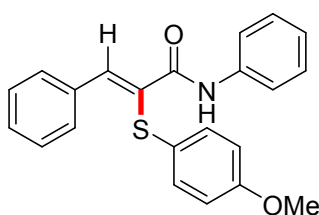

in hexane); white solid; yield 66% (65 mg); in 1 mL EtOH 82% (80 mg); mp 140-141 °C;  $^1\text{H}$  NMR (700 MHz,  $\text{CDCl}_3$ )  $\delta$  8.99 (s, 1H), 8.40 (s, 1H), 7.87 (d,  $J = 7.7$  Hz, 2H), 7.48 (d,  $J = 7.7$  Hz,

2H), 7.42-7.38 (m, 3H), 7.31 (t,  $J = 7.7$  Hz, 2H), 7.26-7.24 (m, 2H), 7.10 (t,  $J = 7.4$  Hz, 1H), 6.82 (d,  $J = 8.4$  Hz, 2H), 3.74 (s, 3H);  $^{13}\text{C}$  NMR (175 MHz,  $\text{CDCl}_3$ )  $\delta$  163.3, 159.2, 146.1, 137.8, 134.7, 130.9, 130.1, 129.7, 129.1, 128.6, 126.0, 124.7, 124.6, 120.1, 115.5, 55.5; IR (KBr)  $\bar{\nu}$  3334, 2924, 2348, 1666, 691; HRMS (ESI/Q-TOF)  $m/z$ :  $[\text{M} + \text{Na}]^+$  calcd for  $\text{C}_{22}\text{H}_{19}\text{NO}_2\text{SNa}$  384.1029; found 384.1041.

**(Z)-2-((4-fluorophenyl)thio)-N,3-diphenylacrylamide (3ad):**  $R_f = 0.6$  (20% ethyl acetate in

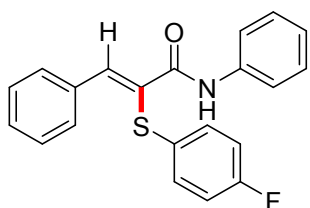

hexane); white solid; yield 81% (77 mg); mp 113-114 °C;  $^1\text{H}$  NMR (700 MHz,  $\text{CDCl}_3$ )  $\delta$  8.94 (s, 1H), 8.47 (s, 1H), 7.85-7.84 (m, 2H), 7.48 (d,  $J = 7.7$  Hz, 2H), 7.41-7.40 (m, 3H), 7.31 (t,  $J =$

8.0 Hz, 2H), 7.28-7.26 (m, 2H), 7.11 (t,  $J = 7.4$  Hz, 1H), 6.99 (t,  $J = 8.6$  Hz, 2H);  $^{13}\text{C}$  NMR



(175 MHz, CDCl<sub>3</sub>) δ 163.0, 162.0 (d, <sup>1</sup>J<sub>CF</sub> = 247.2 Hz), 147.3, 137.7, 134.4, 130.9, 130.4, 129.3 (d, <sup>3</sup>J<sub>CF</sub> = 8.1 Hz), 129.3 (d, <sup>4</sup>J<sub>CF</sub> = 3.2 Hz), 129.2, 128.6, 124.9(×2), 120.2, 117.0 (d, <sup>2</sup>J<sub>CF</sub> = 22.3 Hz); IR (KBr)  $\bar{\nu}$  3353, 2923, 1661, 1314, 690; HRMS (ESI/Q-TOF) m/z: [M + Na]<sup>+</sup> calcd for C<sub>21</sub>H<sub>16</sub>NFOSNa 372.0829; found 372.0846.

**(Z)-2-((4-chlorophenyl)thio)-N,3-diphenylacrylamide (3ae):** R<sub>f</sub> = 0.7 (20% ethyl acetate in

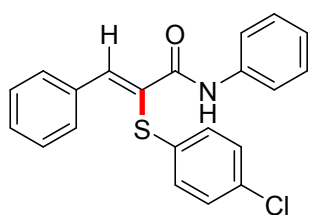

hexane); white solid; yield 86% (86 mg); mp 135-138 °C; <sup>1</sup>H NMR (700 MHz, CDCl<sub>3</sub>) δ 8.94 (s, 1H), 8.53 (s, 1H), 7.83-7.82 (m, 2H), 7.49 (d, *J* = 7.7 Hz, 2H), 7.41-7.40 (m, 3H), 7.32 (t, *J* = 7.7 Hz, 2H), 7.25 (d, *J* = 7.7 Hz, 2H), 7.22 (d, *J* = 8.4 Hz, 2H), 7.12 (t, *J* = 7.7 Hz, 1H); <sup>13</sup>C NMR (175 MHz, CDCl<sub>3</sub>) δ 162.9, 148.1, 137.6, 134.3, 132.9, 132.8, 130.9, 130.5, 130.0, 129.2, 128.7, 128.3, 124.9, 123.8, 120.2; IR (KBr)  $\bar{\nu}$  3348, 2924, 2853, 1663, 754, 690; HRMS (ESI/Q-TOF) m/z: [M + H]<sup>+</sup> calcd for C<sub>21</sub>H<sub>17</sub>ClNOS 366.0714 ; found 366.0684.

**(Z)-2-((4-bromophenyl)thio)-N,3-diphenylacrylamide (3af):** R<sub>f</sub> = 0.5 (20% ethyl acetate in

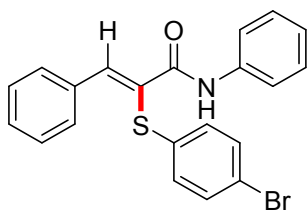

hexane); white solid; yield 91% (101mg); mp 142-144 °C; <sup>1</sup>H NMR (700 MHz, CDCl<sub>3</sub>) δ 8.94 (s, 1H), 8.53 (s, 1H), 7.82-7.81 (m, 2H), 7.49 (d, *J* = 8.4 Hz, 2H), 7.41-7.39 (m, 5H), 7.32 (t, *J* = 7.7 Hz, 2H), 7.16 (d, *J* = 8.4 Hz, 2H), 7.12 (t, *J* = 7.4 Hz, 1H); <sup>13</sup>C NMR (175 MHz, CDCl<sub>3</sub>) δ 162.9, 148.3, 137.6, 134.3, 133.6, 132.8, 130.9, 130.5, 129.9, 128.7, 128.5, 124.9, 123.6, 120.7, 120.2; IR (KBr)  $\bar{\nu}$  3353, 2924, 2359, 1661, 690, 667; HRMS (ESI/Q-TOF) m/z: [M + H]<sup>+</sup> calcd for C<sub>21</sub>H<sub>17</sub>BrNOS 410.0179; found 410.0209.

**(Z)-N,3-diphenyl-2-((4-(trifluoromethyl)phenyl)thio)acrylamide (3ag):** R<sub>f</sub> = 0.6 (20%

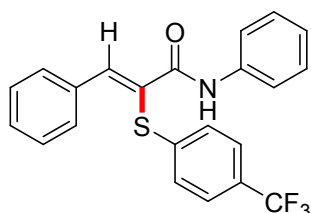

ethyl acetate in hexane); white solid; yield 91% (99 mg); mp

138-141 °C;  $^1\text{H}$  NMR (700 MHz,  $\text{CDCl}_3$ )  $\delta$  8.94 (s, 1H), 8.63 (s, 1H), 7.82- 7.80 (m, 2H), 7.53 (d,  $J = 8.4$  Hz, 2H), 7.49 (d,  $J = 7.7$  Hz, 2H), 7.41-7.40 (m, 3H), 7.39 (d,  $J = 8.4$  Hz, 2H), 7.32 (t,  $J = 7.7$  Hz, 2H), 7.12 (t,  $J = 7.4$  Hz, 1H);  $^{13}\text{C}$  NMR (175 MHz,  $\text{CDCl}_3$ )  $\delta$  162.8, 149.3, 139.5, 137.5, 134.2, 130.9, 130.7, 129.2, 128.8 (q,  $^2J_{\text{CF}} = 32$  Hz), 128.7, 126.6 (q,  $^4J_{\text{CF}} = 3.6$  Hz), 126.6, 125.0, 124.0 (q,  $^1J_{\text{CF}} = 272$  Hz), 122.5, 120.3; IR (KBr)  $\bar{\nu}$  3363, 2923, 1659, 1326, 688; HRMS (ESI/Q-TOF)  $m/z$ :  $[\text{M} + \text{H}]^+$  calcd for  $\text{C}_{22}\text{H}_{17}\text{F}_3\text{NOS}$  400.0977; found 400.0970.

**(Z)-2-((3-methoxyphenyl)thio)-N,3-diphenylacrylamide (3ah):**  $R_f = 0.7$  (20% ethyl acetate

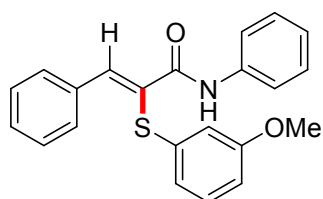

in hexane); white solid; yield 78% (76 mg); mp 101-103 °C;  $^1\text{H}$  NMR (700 MHz,  $\text{CDCl}_3$ )  $\delta$  9.00 (s, 1H), 8.53 (s, 1H), 7.86-7.85 (m, 2H), 7.49 (d,  $J = 7.7$  Hz, 2H), 7.40-7.39 (m, 3H), 7.31 (t,  $J = 7.7$  Hz, 2H), 7.20 (t,  $J = 8.2$  Hz, 1H), 7.10 (t,  $J = 7.4$  Hz, 1H), 6.90 (dd,  $J = 7.7, 0.7$  Hz, 1H), 6.84 (s, 1H), 6.72 (dd,  $J = 8.4, 1.8$  Hz, 1H), 3.74 (s, 3H);  $^{13}\text{C}$  NMR (175 MHz,  $\text{CDCl}_3$ )  $\delta$  163.1, 160.5, 147.8, 137.8, 135.5, 134.5, 130.9, 130.7, 130.3, 129.1, 128.6, 124.7, 124.14, 120.2, 119.3, 112.6, 112.6, 55.4; IR (KBr)  $\bar{\nu}$  3345, 2924, 2359, 1668, 689; HRMS (ESI/Q-TOF)  $m/z$ :  $[\text{M} + \text{Na}]^+$  calcd for  $\text{C}_{22}\text{H}_{19}\text{NO}_2\text{SNa}$  384.1029; found 384.1015.

**(Z)-2-((3-chlorophenyl)thio)-N,3-diphenylacrylamide (3ai):**  $R_f = 0.6$  (20% ethyl acetate in

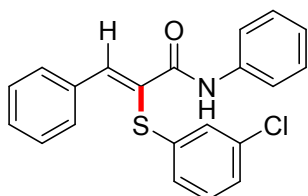

hexane); white solid; yield 90% (89 mg); mp 150-152 °C;  $^1\text{H}$  NMR (400 MHz,  $\text{CDCl}_3$ )  $\delta$  8.96 (s, 1H), 8.58 (s, 1H), 7.84-7.81 (m, 2H), 7.51 (d,  $J = 8.0$  Hz, 2H), 7.42-7.40 (m, 3H), 7.32 (t,  $J = 8.0$  Hz, 2H), 7.30 (s, 1H), 7.23-7.10 (m, 4H);  $^{13}\text{C}$  NMR (100 MHz,  $\text{CDCl}_3$ )  $\delta$  162.8, 148.7, 137.6, 136.4, 135.6, 134.3, 130.9, 130.8, 130.6, 129.2, 128.7, 127.1, 126.7, 124.9, 124.9, 123.2,

120.3; IR (KBr)  $\bar{\nu}$  3348, 2348, 1665, 774, 690; HRMS (ESI/Q-TOF)  $m/z$ :  $[M + H]^+$  calcd for  $C_{21}H_{17}ClNOS$  366.0714; found 366.0713.

**(Z)-2-((2-fluorophenyl)thio)-N,3-diphenylacrylamide (3aj):**  $R_f = 0.6$  (20% ethyl acetate in

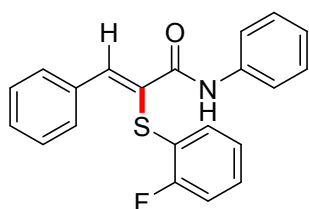

hexane); white solid; yield 79% (75 mg); mp 105-108 °C;  $^1H$  NMR (700 MHz,  $CDCl_3$ )  $\delta$  9.05 (s, 1H), 8.51 (s, 1H), 7.87-7.86 (m, 2H), 7.53 (d,  $J = 7.7$  Hz, 2H), 7.45-7.39 (m, 3H), 7.32 (t,  $J = 7.7$  Hz, 2H), 7.21-7.16 (m, 2H), 7.11 (t,  $J = 7.7$  Hz, 1H), 7.09 (t,  $J = 8.7$  Hz, 1H), 7.03 (t,  $J = 7.7$  Hz, 1H);  $^{13}C$  NMR (175 MHz,  $CDCl_3$ )  $\delta$  163.0, 160.2 (d,  $^1J_{CF} = 245.2$  Hz), 147.9, 137.7, 134.4, 130.9, 130.4, 129.9, 129.1, 129.0 (d,  $^3J_{CF} = 7.6$  Hz), 128.6, 125.5 (d,  $^4J_{CF} = 3.4$  Hz), 124.8, 123.7, 121.3 (d,  $^2J_{CF} = 17.0$  Hz), 120.2, 116.1 (d,  $^2J_{CF} = 21.3$  Hz); IR (KBr)  $\bar{\nu}$  3355, 3056, 2924, 1652, 1178, 689; HRMS (ESI/Q-TOF)  $m/z$ :  $[M + H]^+$  calcd for  $C_{21}H_{17}FNOS$  350.1009; found 350.1003.

**(Z)-3-((2-aminophenyl)thio)-N,3-diphenylacrylamide (3ak):**  $R_f = 0.4$  (20% ethyl acetate

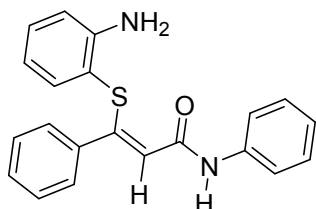

in hexane); brownish white solid; yield 86% (81 mg); mp 175-176 °C;  $^1H$  NMR (400 MHz,  $CDCl_3$ )  $\delta$  7.64 (s, 1H), 7.63 (d,  $J = 7.4$  Hz, 2H), 7.33 (t,  $J = 7.8$  Hz, 2H), 7.20-7.18 (m, 2H), 7.13-7.08 (m, 5H), 7.93-6.88 (m, 1H), 6.44-6.40 (m, 2H), 6.16 (s, 1H), 4.25 (s, 2H);  $^{13}C$  NMR (100 MHz,  $CDCl_3$ )  $\delta$  164.1, 157.4, 148.8, 138.4, 138.2, 137.4, 130.6, 129.1, 128.4, 127.5, 124.4, 119.8, 119.7, 118.0, 115.0, 114.7; IR (KBr)  $\bar{\nu}$  3432, 3359, 2923, 2359, 1607, 668; HRMS (ESI/Q-TOF)  $m/z$ :  $[M + Na]^+$  calcd for  $C_{21}H_{18}N_2OSNa$  369.1032 ; found 369.1020.

**(Z)-3-phenyl-2-(phenylthio)-N-(p-tolyl)acrylamide (3ba):**  $R_f = 0.4$  (20% ethyl acetate in

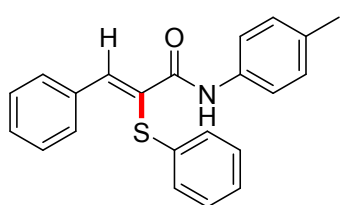

hexane); white solid; yield 96% (85 mg); mp 108-111 °C;  $^1H$  NMR (400 MHz,  $CDCl_3$ )  $\delta$  8.93 (s, 1H), 8.51 (s, 1H), 7.86-

7.84 (m, 2H), 7.42-7.38 (m, 3H), 7.34 (d,  $J = 8.2$  Hz, 2H), 7.31-7.26 (m, 4H), 7.19-7.16 (m, 1H), 7.10 (d,  $J = 8.2$  Hz, 2H), 2.29 (s, 3H);  $^{13}\text{C}$  NMR (100 MHz,  $\text{CDCl}_3$ )  $\delta$  163.0, 147.4, 135.2, 134.6, 134.4, 134.4, 130.9, 130.2, 129.8, 129.6, 128.6, 127.2, 126.8, 124.4, 120.3, 21.0; IR (KBr)  $\bar{\nu}$  3360, 2921, 2369, 1676, 689; HRMS (ESI/Q-TOF)  $m/z$ :  $[\text{M} + \text{H}]^+$  calcd for  $\text{C}_{22}\text{H}_{20}\text{NOS}$  346.1260; found 346.1277.

**(Z)-N-(2,4-dimethylphenyl)-3-phenyl-2-(phenylthio)acrylamide (3ca):**  $R_f = 0.6$  (20%

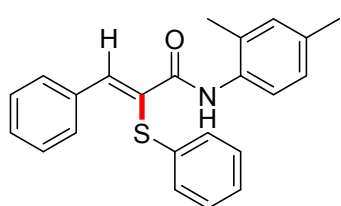

ethyl acetate in hexane); white solid; yield 91% (79 mg); mp 143-146 °C;  $^1\text{H}$  NMR (700 MHz,  $\text{CDCl}_3$ )  $\delta$  8.92 (s, 1H), 8.56 (s, 1H), 7.86-7.85 (m, 2H), 7.77 (d,  $J = 8.4$  Hz, 1H), 7.41-7.38 (m, 3H), 7.31-7.27 (m, 4H), 7.18 (t,  $J = 7.0$  Hz, 1H), 7.00 (d,  $J = 8.4$  Hz, 1H), 6.92 (s, 1H), 2.26 (s, 3H), 1.93 (s, 3H);  $^{13}\text{C}$  NMR (175 MHz,  $\text{CDCl}_3$ )  $\delta$  162.9, 147.9, 134.9, 134.7, 134.6, 133.3, 131.2, 130.8, 130.2, 129.8, 129.1, 128.6, 127.4, 126.9, 126.7, 124.3, 122.4, 21.0, 17.3; IR (KBr)  $\bar{\nu}$  3365, 2923, 2853, 1673, 690; HRMS (ESI/Q-TOF)  $m/z$ :  $[\text{M} + \text{Na}]^+$  calcd for  $\text{C}_{23}\text{H}_{21}\text{NOSNa}$  382.1236; found 382.1250.

**(Z)-N-mesityl-3-phenyl-2-(phenylthio)acrylamide (3da):**  $R_f = 0.8$  (20% ethyl acetate in

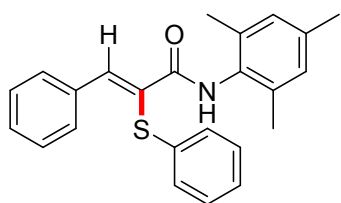

hexane); white solid; yield 88% (75 mg); mp 158-160 °C;  $^1\text{H}$  NMR (700 MHz,  $\text{CDCl}_3$ )  $\delta$  8.52 (s, 1H), 8.39 (s, 1H), 7.88-7.87 (m, 2H), 7.42-7.38 (m, 3H), 7.35 (d,  $J = 7.0$  Hz, 2H), 7.31 (t,  $J = 7.7$  Hz, 2H), 7.21 (t,  $J = 7.4$  Hz, 1H), 6.83 (s, 2H), 2.24 (s, 3H), 1.89 (s, 6H);  $^{13}\text{C}$  NMR (175 MHz,  $\text{CDCl}_3$ )  $\delta$  163.6, 147.4, 137.2, 135.3, 134.8, 134.7, 131.3, 130.8, 130.1, 129.8, 129.0, 128.5, 127.4, 126.8, 124.3, 21.0, 18.1; IR (KBr)  $\bar{\nu}$  3259, 2923, 2853, 1646, 689; HRMS (ESI/Q-TOF)  $m/z$ :  $[\text{M} + \text{H}]^+$  calcd for  $\text{C}_{24}\text{H}_{24}\text{NOS}$  374.1573; found 374.1576.

**(Z)-N-(4-ethylphenyl)-3-phenyl-2-(phenylthio)acrylamide (3ea):**  $R_f = 0.6$  (20% ethyl

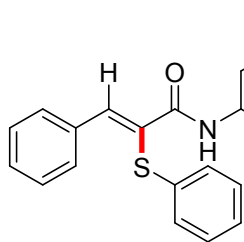

acetate in hexane); white solid; yield 97% (84 mg); mp 115-117 °C;  $^1\text{H}$  NMR (400 MHz,  $\text{CDCl}_3$ )  $\delta$  8.96 (s, 1H), 8.52 (s, 1H), 7.86-7.84 (m, 2H), 7.42-7.38 (m, 5H), 7.32-7.26 (m, 4H), 7.19-7.18 (m, 1H), 7.13 (d,  $J = 8.4$  Hz, 2H), 2.60 (q,  $J = 7.6$

Hz, 2H), 1.20 (t,  $J = 7.6$  Hz, 3H);  $^{13}\text{C}$  NMR (100 MHz,  $\text{CDCl}_3$ )  $\delta$  163.0, 147.4, 140.9, 135.4, 134.6, 134.4, 130.9, 130.2, 129.8, 128.6, 128.4, 127.2, 126.8, 124.4, 120.4, 28.5, 15.8; IR (KBr)  $\bar{\nu}$  3341, 2959, 1716, 667; HRMS (ESI/Q-TOF)  $m/z$ :  $[\text{M} + \text{H}]^+$  calcd for  $\text{C}_{23}\text{H}_{22}\text{NOS}$  360.1417; found 360.1426.

**(Z)-N-(4-isopropylphenyl)-3-phenyl-2-(phenylthio)acrylamide (3fa):**  $R_f = 0.7$  (20% ethyl

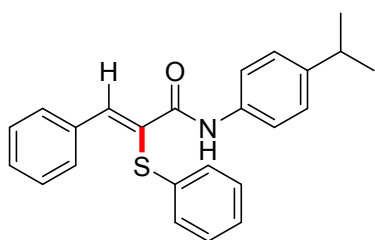

acetate in hexane); white solid; yield 89% (76 mg); mp 129-133 °C;  $^1\text{H}$  NMR (700 MHz,  $\text{CDCl}_3$ )  $\delta$  8.96 (s, 1H), 8.53 (s, 1H), 7.86-7.85 (m, 2H), 7.41-7.38 (m, 5H), 7.31 (d,  $J = 7.7$  Hz, 2H), 7.28 (t,  $J = 7.7$  Hz, 2H), 7.18 (d,  $J = 7.7$  Hz, 1H),

7.16 (d,  $J = 7.7$  Hz, 2H), 2.86 (sept,  $J = 7.0$  Hz, 1H), 1.22 (d,  $J = 7.0$  Hz, 6H);  $^{13}\text{C}$  NMR (175 MHz,  $\text{CDCl}_3$ )  $\delta$  163.0, 147.5, 145.5, 135.5, 134.6, 134.4, 130.9, 130.2, 129.8, 128.6, 127.2, 127.0, 126.8, 124.4, 120.4, 33.7, 24.1; IR (KBr)  $\bar{\nu}$  3359, 2957, 2868, 2358, 1652, 690; HRMS (ESI/Q-TOF)  $m/z$ :  $[\text{M} + \text{Na}]^+$  calcd for  $\text{C}_{24}\text{H}_{23}\text{NOSNa}$  396.1393; found 396.1409.

**(Z) N-(4-(tert-butyl)phenyl)-3-phenyl-2-(phenylthio)acrylamide (3ga):**  $R_f = 0.8$  (20%

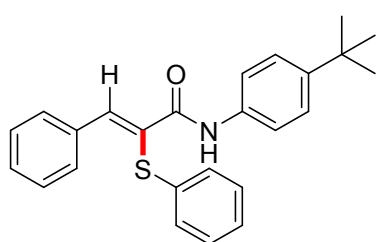

ethyl acetate in hexane); white solid; yield 95% (79 mg); mp 137-139 °C;  $^1\text{H}$  NMR (400 MHz,  $\text{CDCl}_3$ )  $\delta$  8.96 (s, 1H), 8.53 (s, 1H), 7.86-7.84 (m, 2H), 7.40-7.38 (m, 5H), 7.33-7.28 (m, 6H), 7.18 (t,  $J = 6.8$  Hz, 1H), 1.29 (s, 9H);  $^{13}\text{C}$

NMR (100 MHz, CDCl<sub>3</sub>)  $\delta$  163.1, 147.8, 147.5, 135.2, 134.6, 134.4, 130.9, 130.2, 129.8, 128.6, 127.2, 126.8, 125.9, 124.4, 120.0, 34.5, 31.5; IR (KBr)  $\bar{\nu}$  3338, 3069, 2962, 1661, 689; HRMS (ESI/Q-TOF) m/z: [M + Na]<sup>+</sup> calcd for C<sub>25</sub>H<sub>25</sub>NOSNa 410.1549; found 410.1562.

**(Z)-N-(4-methoxyphenyl)-3-phenyl-2-(phenylthio)acrylamide (3ha):** R<sub>f</sub> = 0.6 (20% ethyl

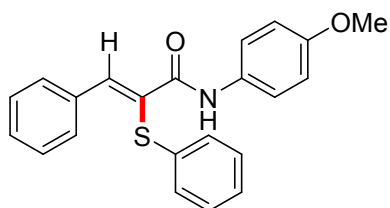

acetate in hexane); white solid; yield 79% (68 mg); mp 129-131 °C; <sup>1</sup>H NMR (400 MHz, CDCl<sub>3</sub>)  $\delta$  8.89 (s, 1H), 8.51 (s, 1H), 7.85-7.83 (m, 2H), 7.42-7.39 (m, 3H), 7.35 (d, *J* = 8.8 Hz, 2H), 7.31-7.26 (m, 4H), 7.20-7.17 (m, 1H), 6.83 (d, *J* = 8.8 Hz, 2H), 3.77 (s, 3H); <sup>13</sup>C NMR (100 MHz, CDCl<sub>3</sub>)  $\delta$  163.0, 156.8, 147.2, 134.6, 134.5, 130.9, 130.8, 130.2, 129.8, 128.6, 127.2, 126.8, 124.4, 122.0, 114.3, 55.6; IR (KBr)  $\bar{\nu}$  3348, 2923, 2359, 1672, 689; HRMS (ESI/Q-TOF) m/z: [M + Na]<sup>+</sup> calcd for C<sub>22</sub>H<sub>19</sub>NO<sub>2</sub>SNa 384.1029; found 384.1024.

**(Z)-N-([1,1'-biphenyl]-4-yl)-3-phenyl-2-(phenylthio)acrylamide (3ia):** R<sub>f</sub> = 0.5 (20% ethyl

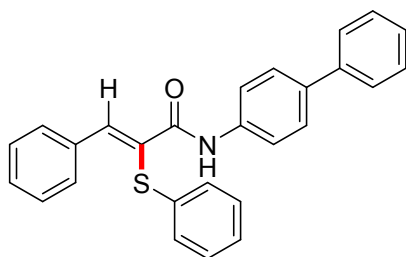

acetate in hexane); brownish white solid; yield 43% (36 mg); mp 163-167 °C; <sup>1</sup>H NMR (400 MHz, CDCl<sub>3</sub>)  $\delta$  9.07 (s, 1H), 8.54 (s, 1H), 7.88-7.86 (m, 2H), 7.56-7.52 (m, 6H), 7.43-7.40 (m, 5H), 7.34-7.28 (m, 5H), 7.19 (t, *J* = 6.8 Hz, 1H); <sup>13</sup>C NMR (100 MHz, CDCl<sub>3</sub>)  $\delta$  163.2, 147.7, 140.6, 137.7, 137.1, 134.6, 134.3, 130.9, 130.3, 129.9, 128.9, 128.6, 127.7, 127.3, 127.2, 127.0, 126.9, 124.3, 120.5; IR (KBr)  $\bar{\nu}$  3316, 2922, 1652, 687; HRMS (ESI/Q-TOF) m/z: [M + H]<sup>+</sup> calcd for C<sub>27</sub>H<sub>22</sub>NOS 408.1417; found 408.1433.

**(Z)-N-(2-fluorophenyl)-3-phenyl-2-(phenylthio)acrylamide (3ja):**  $R_f = 0.7$  (20% ethyl

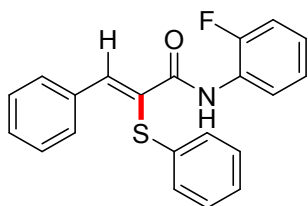

acetate in hexane); white solid; yield 98% (86 mg); mp 125-127 °C;  $^1\text{H NMR}$  (700 MHz,  $\text{CDCl}_3$ )  $\delta$  9.38 (s, 1H), 8.52 (s, 1H), 8.38 (t,  $J = 8.0$  Hz, 1H), 7.90-7.89 (m, 2H), 7.43-7.39 (m, 3H), 7.33 (d,  $J = 7.0$  Hz, 2H), 7.28 (t,  $J = 8.0$  Hz, 2H), 7.18 (t,  $J = 7.0$  Hz, 1H), 7.13-7.12 (m, 1H), 7.05-7.01 (m, 2H);  $^{13}\text{C NMR}$  (175 MHz,  $\text{CDCl}_3$ )  $\delta$  163.2, 152.9 (d,  $^1J_{\text{CF}} = 244.4$  Hz), 147.8, 134.4, 134.0, 131.0, 130.4, 129.7, 128.6, 127.6, 127.0, 126.5 (d,  $^3J_{\text{CF}} = 10.0$  Hz), 124.6 (d,  $^4J_{\text{CF}} = 1.6$  Hz), 124.63, 124.59, 121.5, 114.9 (d,  $^2J_{\text{CF}} = 19.0$  Hz); IR (KBr)  $\bar{\nu}$  3358, 2924, 1699, 1320, 690; HRMS (ESI/Q-TOF)  $m/z$ :  $[\text{M} + \text{Na}]^+$  calcd for  $\text{C}_{21}\text{H}_{16}\text{FNOSNa}$  372.0829; found 372.0834.

**(Z)-N-(2-chlorophenyl)-3-phenyl-2-(phenylthio)acrylamide (3ka):**  $R_f = 0.75$  (20% ethyl

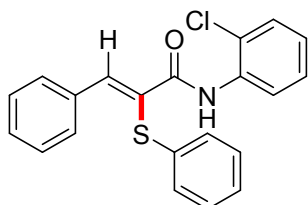

acetate in hexane); white solid; yield 98% (84 mg); mp 117-119 °C;  $^1\text{H NMR}$  (400 MHz,  $\text{CDCl}_3$ )  $\delta$  9.77 (s, 1H), 8.54 (s, 1H), 8.48 (d,  $J = 8.0$  Hz, 1H), 7.90-7.89 (m, 2H), 7.41-7.40 (m, 3H), 7.32-7.25 (m, 6H), 7.17 (t,  $J = 7.2$  Hz, 1H), 7.01 (t,  $J = 7.6$  Hz, 1H);  $^{13}\text{C NMR}$  (175 MHz,  $\text{CDCl}_3$ )  $\delta$  163.3, 148.3, 134.9, 134.5, 134.1, 131.0, 130.5, 129.7, 129.2, 128.6, 127.8, 127.4, 126.8, 124.8, 124.6, 123.6, 121.3; IR (KBr)  $\bar{\nu}$  3330, 3059, 2926, 1699, 738, 689; HRMS (ESI/Q-TOF)  $m/z$ :  $[\text{M} + \text{H}]^+$  calcd for  $\text{C}_{21}\text{H}_{17}\text{ClINOS}$  366.0714; found 366.0718.

**(Z)-N-(2-bromophenyl)-3-phenyl-2-(phenylthio)acrylamide (3la):**  $R_f = 0.85$  (20% ethyl

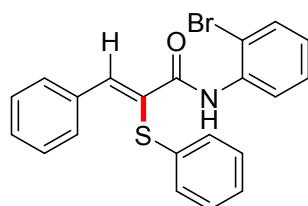

acetate in hexane); white solid; yield 88% (72 mg); mp 124-126 °C;  $^1\text{H NMR}$  (400 MHz,  $\text{CDCl}_3$ )  $\delta$  9.77 (s, 1H), 8.55 (s, 1H), 8.47 (d,  $J = 8.4$  Hz, 1H), 7.90-7.88 (m, 2H), 7.48 (d,  $J = 8.2$  Hz, 1H),

7.41-7.40 (m, 3H), 7.32-7.25 (m, 5H), 7.17 (t,  $J = 7.2$  Hz, 1H), 6.95 (t,  $J = 7.6$  Hz, 1H);  $^{13}\text{C}$  NMR (100 MHz,  $\text{CDCl}_3$ )  $\delta$  163.4, 148.4, 136.1, 134.5, 134.2, 132.5, 131.0, 130.5, 129.7, 128.6, 128.4, 127.3, 126.8, 125.3, 124.4, 121.6, 114.0; IR (KBr)  $\bar{\nu}$  3314, 1672, 737, 688; HRMS (ESI/Q-TOF)  $m/z$ :  $[\text{M} + \text{Na}]^+$  calcd for  $\text{C}_{21}\text{H}_{16}\text{BrNOSNa}$  432.0028; found 432.0041.

**(Z)-N-(2-iodophenyl)-3-phenyl-2-(phenylthio)acrylamide (3ma):**  $R_f = 0.8$  (20% ethyl

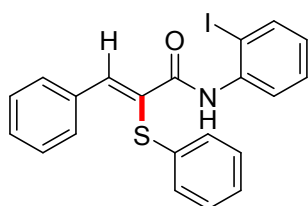

acetate in hexane); white solid; yield 76% (60 mg); mp 128-130 °C;

$^1\text{H}$  NMR (700 MHz,  $\text{CDCl}_3$ )  $\delta$  9.58 (s, 1H), 8.57 (s, 1H), 8.36 (dd,  $J = 8.2, 1.1$  Hz, 1H), 7.89-7.88 (m, 2H), 7.74 (dd,  $J = 7.7, 1.4$  Hz,

1H), 7.41-7.4 (m, 3H), 7.35-7.31 (m, 3H), 7.28-7.26 (m, 2H), 7.17 (t,  $J = 7.4$  Hz, 1H), 6.82-6.80 (m, 1H);  $^{13}\text{C}$  NMR (175 MHz,  $\text{CDCl}_3$ )  $\delta$  163.6, 148.6, 139.1, 138.7, 134.5, 134.4, 131.0, 130.5, 129.7, 129.2, 128.6, 127.2, 126.7, 126.1, 124.2, 121.6, 89.8; IR (KBr)  $\bar{\nu}$  3293, 3058, 1672, 688, 524; HRMS (ESI/Q-TOF)  $m/z$ :  $[\text{M} + \text{Na}]^+$  calcd for  $\text{C}_{21}\text{H}_{16}\text{INOSNa}$  479.9889; found 479.9904.

**(Z)-N-(4-cyanophenyl)-3-phenyl-2-(phenylthio)acrylamide (3na):**  $R_f = 0.5$  (20% ethyl

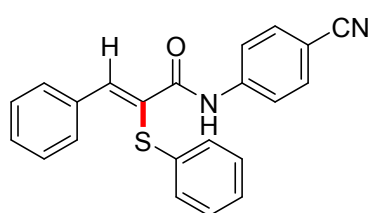

acetate in hexane); brownish white solid; yield 74% (64 mg);

mp > 180 °C;  $^1\text{H}$  NMR (400 MHz,  $\text{CDCl}_3$ )  $\delta$  9.19 (s, 1H),

8.52 (s, 1H), 7.88-7.86 (m, 2H), 7.63-7.57 (m, 4H), 7.42-7.41

(m, 3H), 7.32-7.29 (m, 4H), 7.22-7.20 (m, 1H);  $^{13}\text{C}$  NMR

(100 MHz,  $\text{CDCl}_3$ )  $\delta$  163.6, 148.7( $\times 2$ ), 141.7, 134.2, 133.8, 133.3, 131.0, 130.8, 130.0, 128.7, 127.2, 123.5, 119.9, 118.9, 107.6; IR (KBr)  $\bar{\nu}$  3325, 2359, 1661, 687; HRMS (ESI/Q-TOF)  $m/z$ :  $[\text{M} + \text{H}]^+$  calcd for  $\text{C}_{22}\text{H}_{17}\text{N}_2\text{OS}$  357.1056; found 357.1067.



**(Z)-N-(4-nitrophenyl)-3-phenyl-2-(phenylthio)acrylamide (3oa):**  $R_f = 0.3$  (20% ethyl

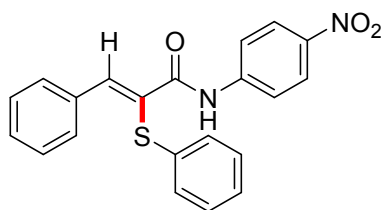

acetate in hexane); brownish white solid; yield 70% (59 mg); mp 156-157 °C;  $^1\text{H}$  NMR (400 MHz,  $\text{CDCl}_3$ )  $\delta$  9.30 (s, 1H), 8.53 (s, 1H), 8.18 (d,  $J = 8.8$  Hz, 2H), 7.88-7.86 (m, 2H), 7.66 (d,  $J = 8.8$  Hz, 2H), 7.43-7.41 (m, 3H), 7.31-7.30 (m, 4H), 7.23-7.18 (m, 1H);  $^{13}\text{C}$  NMR (100 MHz,  $\text{CDCl}_3$ )  $\delta$  163.7, 149.0, 143.9, 143.5, 134.1, 133.7, 131.1, 130.8, 130.0, 128.7, 127.23, 127.18, 125.1, 123.5, 119.5; IR (KBr)  $\bar{\nu}$  3356, 2924, 2359, 1700, 1558, 689; HRMS (ESI/Q-TOF)  $m/z$ :  $[\text{M} + \text{H}]^+$  calcd for  $\text{C}_{21}\text{H}_{17}\text{N}_2\text{O}_3\text{S}$  377.0954; found 377.0952.

**(Z)-N-(3-chlorophenyl)-3-phenyl-2-(phenylthio)acrylamide (3pa):**  $R_f = 0.8$  (20% ethyl

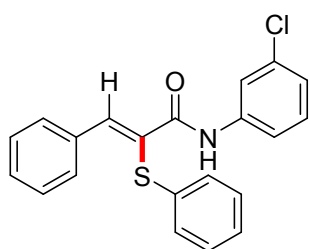

acetate in hexane); white solid; yield 98% (84 mg); mp 102-103 °C;  $^1\text{H}$  NMR (700 MHz,  $\text{CDCl}_3$ )  $\delta$  9.01 (s, 1H), 8.52 (s, 1H), 7.86-7.85 (m, 2H), 7.60 (s, 1H), 7.41-7.40 (m, 3H), 7.31-7.28 (m, 5H), 7.22-7.18 (m, 2H), 7.07 (d,  $J = 7.7$  Hz, 1H);  $^{13}\text{C}$  NMR (175 MHz,  $\text{CDCl}_3$ )  $\delta$  163.3, 148.1, 138.9, 134.8, 134.4, 134.1, 131.0, 130.5, 130.0, 129.9, 128.6, 127.1, 127.0, 124.8, 123.9, 120.2, 118.1; IR (KBr)  $\bar{\nu}$  3341, 3059, 1667, 738, 689; HRMS (ESI/Q-TOF)  $m/z$ :  $[\text{M} + \text{Na}]^+$  calcd for  $\text{C}_{21}\text{H}_{16}\text{ClNOSNa}$  388.0533; found 388.0545.

**(Z)-N-(4-chloro-2-methylphenyl)-3-phenyl-2-(phenylthio)acrylamide (3qa):**  $R_f = 0.85$

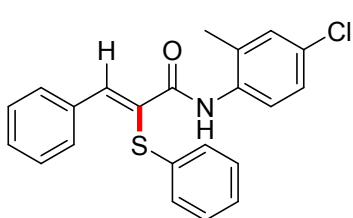

(20% ethyl acetate in hexane); white solid; yield 98% (82 mg); mp 137-139 °C;  $^1\text{H}$  NMR (700 MHz,  $\text{CDCl}_3$ )  $\delta$  8.97 (s, 1H), 8.57 (s, 1H), 7.92 (d,  $J = 9.1$  Hz, 1H), 7.87-7.85 (m, 2H), 7.42-7.40 (m, 3H), 7.30-7.29 (m, 4H), 7.21-7.18 (m, 1H), 7.17 (dd,  $J = 8.4, 2.1$  Hz, 1H), 7.09 (s, 1H), 1.94 (s, 3H);  $^{13}\text{C}$  NMR (175 MHz,  $\text{CDCl}_3$ )  $\delta$  163.0, 148.5, 134.6, 134.5, 134.4, 130.9, 130.6, 130.4, 130.2, 130.0, 129.8, 128.6, 126.84,

126.83, 126.81, 123.8, 123.3, 17.3; IR (KBr)  $\bar{\nu}$  3351, 3056, 1670, 765, 690; HRMS (ESI/Q-TOF)  $m/z$ :  $[M + Na]^+$  calcd for  $C_{22}H_{18}ClNOSNa$  402.0690; found 402.0674.

**((Z)-N-benzyl-3-phenyl-2-(phenylthio)acrylamide (3ra):**  $R_f = 0.45$  (20% ethyl acetate in

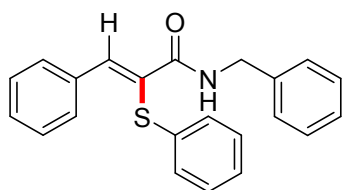

hexane); white solid; yield 88% (68 mg); mp 102-103 °C;  $^1H$

NMR (700 MHz,  $CDCl_3$ )  $\delta$  8.44 (s, 1H), 7.82 (d,  $J = 6.3$  Hz, 2H), 7.39-7.36 (m, 4H), 7.28-7.26 (m, 2H), 7.23-7.21 (m, 3H),

7.20-7.17 (m, 3H), 6.91 (d,  $J = 6.3$  Hz, 2H), 4.46 (d,  $J = 6.3$  Hz, 2H);  $^{13}C$  NMR (175 MHz,  $CDCl_3$ )  $\delta$  165.1, 146.7, 137.9, 134.8, 134.7, 130.8, 130.0, 129.7, 128.7, 128.5, 127.4, 127.4,

127.3, 126.6, 124.4, 44.4; IR (KBr)  $\bar{\nu}$  3314, 2924, 2853, 1651, 690; HRMS (ESI/Q-TOF)  $m/z$ :  $[M + Na]^+$  calcd for  $C_{22}H_{19}NOSNa$  368.1080; found 368.1080.

**(Z)-N-(naphthalen-1-yl)-3-phenyl-2-(phenylthio)acrylamide (3sa):**  $R_f = 0.4$  (10% ethyl

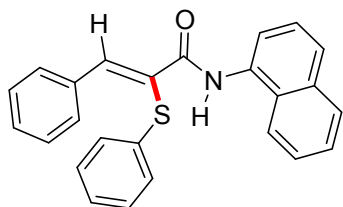

acetate in hexane); white solid; yield 78% (64 mg); mp 160-

164 °C;  $^1H$  NMR (400 MHz,  $CDCl_3$ )  $\delta$  9.48 (s, 1H), 8.63 (s, 1H), 7.98 (d,  $J = 7.7$  Hz, 1H), 7.91-7.89(m, 2H), 7.82 (d,  $J =$

8.2 Hz, 1H), 7.67 (d,  $J = 8.2$  Hz, 1H), 7.49-7.45 (m, 2H), 7.45-7.41 (m, 6H), 7.34 (t,  $J = 7.8$

Hz, 3H), 7.30-7.20 (m, 1H);  $^{13}C$  NMR (100 MHz,  $CDCl_3$ )  $\delta$  163.6, 148.3, 134.6, 134.57,

134.1, 132.5, 130.9, 130.4, 129.9, 128.8, 128.6, 127.3 127.2, 126.9, 126.4, 126.0, 125.9,

125.9, 124.3, 120.6, 120.5; IR (KBr)  $\bar{\nu}$  3366, 3052, 2360, 1671, 689; HRMS (ESI/Q-TOF)

$m/z$ :  $[M + Na]^+$  calcd for  $C_{25}H_{19}NOSNa$  404.1080; found 404.1093.

**(Z)-3-phenyl-2-(phenylthio)-N-(quinolin-3-yl)acrylamide (3ta):**  $R_f = 0.4$  (30% ethyl

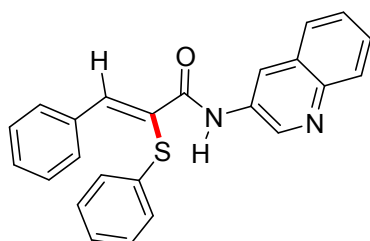

acetate in hexane); white solid; yield 62% (52 mg); mp 169-

173 °C;  $^1H$  NMR (400 MHz,  $CDCl_3$ )  $\delta$  9.23 (s, 1H), 8.73 (d,

$J = 2.4$  Hz, 1H), 8.60 (d,  $J = 2.5$  Hz, 1H), 8.56 (s, 1H), 8.02 (d,  $J = 8.4$  Hz, 1H), 7.90-7.88 (m, 2H), 7.80 (d,  $J = 8.2$  Hz, 1H), 7.64-7.60 (m, 1H), 7.54-7.50 (m, 1H), 7.43-7.41 (m, 3H), 7.36-7.28 (m, 4H), 7.21-7.17 (m, 1H);  $^{13}\text{C}$  NMR (100 MHz,  $\text{CDCl}_3$ )  $\delta$  163.9, 148.2, 145.9, 144.3, 134.3, 134.0, 131.3, 131.0, 130.6, 130.0, 129.2, 128.7, 128.6, 128.3, 127.9, 127.4, 127.3, 127.2, 124.2, 123.9; IR (KBr)  $\bar{\nu}$  3346, 2954, 2339, 1663, 688; HRMS (ESI/Q-TOF)  $m/z$ :  $[\text{M} + \text{H}]^+$  calcd for  $\text{C}_{24}\text{H}_{19}\text{N}_2\text{OS}$  383.1213; found 383.1235.

**(Z)-N-([1,1'-biphenyl]-2-yl)-3-phenyl-2-(phenylthio)acrylamide (3ua):**  $R_f = 0.75$  (10%

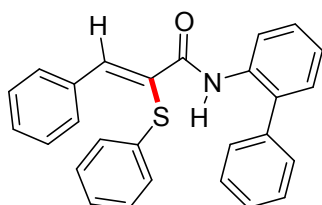

ethyl acetate in hexane); colorless liquid; yield 48% (39 mg);  $^1\text{H}$

NMR (400 MHz,  $\text{CDCl}_3$ )  $\delta$  9.45 (s, 1H), 8.66 (d,  $J = 8.2$  Hz, 1H),

8.55 (s, 1H), 7.83-7.81 (m, 2H), 7.43-7.40 (m, 4H), 7.37-7.35 (m,

3H), 7.26-7.24 (m, 2H), 7.22-7.10 (m, 5H), 6.92-6.90 (m, 2H);  $^{13}\text{C}$  NMR (100 MHz,  $\text{CDCl}_3$ )

$\delta$  163.1, 147.8, 138.0, 135.3, 134.5, 134.2, 132.3, 130.8, 130.2, 129.5, 129.4, 129.4, 129.1,

128.5, 128.5, 127.9, 126.7, 126.3, 124.4, 124.1, 120.0; IR (KBr)  $\bar{\nu}$  3331, 2359, 1668, 689;

HRMS (ESI/Q-TOF)  $m/z$ :  $[\text{M} + \text{Na}]^+$  calcd for  $\text{C}_{27}\text{H}_{21}\text{NOSNa}$  4430.1236; found 430.1239.

**(R,Z)-N,3-diphenyl-2-(phenylsulfinyl)acrylamide 4:**  $R_f = 0.55$  (20% ethyl acetate in

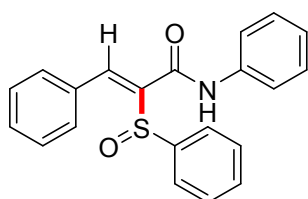

hexane); white solid; yield 90% (66 mg); mp 141-142  $^\circ\text{C}$ ;  $^1\text{H}$

NMR (700 MHz,  $\text{CDCl}_3$ )  $\delta$  10.33 (s, 1H), 8.40 (s, 1H), 7.68-7.66

(m, 2H), 7.60-7.59 (m, 2H), 7.50-7.44 (m, 8H), 7.29 (t,  $J = 7.7$

Hz, 2H), 7.09 (t,  $J = 7.7$  Hz, 1H);  $^{13}\text{C}$  NMR (175 MHz,  $\text{CDCl}_3$ )  $\delta$  161.4, 147.8, 141.4, 137.8,

134.9, 132.5, 131.3, 130.94, 130.90, 129.8, 129.1( $\times 2$ ), 124.7, 124.4, 120.8; IR (KBr)  $\bar{\nu}$  3352,

3058, 2348, 1677, 1316, 690; HRMS (ESI/Q-TOF)  $m/z$ :  $[\text{M} + \text{Na}]^+$  calcd for  $\text{C}_{21}\text{H}_{17}\text{NO}_2\text{SNa}$

370.0872; found 370.0862.

**(Z)-N-([1,1'-biphenyl]-2-yl)-3-phenyl-2-(phenylthio)acrylamide 5:**  $R_f = 0.85$  (20% ethyl

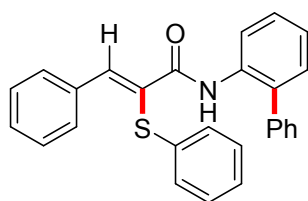

acetate in hexane); liquid; yield 98% (58 mg);  $^1\text{H}$  NMR (700 MHz,

$\text{CDCl}_3$ )  $\delta$  9.41 (s, 1H), 8.62 (d,  $J = 7.7$  Hz, 1H), 8.52 (s, 1H), 7.81-

7.80 (m, 2H), 7.43-7.35 (m, 7H), 7.24 (dd,  $J = 7.7, 1.4$  Hz, 2H),

7.20-7.20-7.18 (m, 1H), 7.18-7.15 (m, 2H), 7.14 (dd,  $J = 7.7, 0.7$  Hz, 1H), 7.11 (t,  $J = 7.4$  Hz,

1H), 6.89 (d,  $J = 7.7$  Hz, 2H);  $^{13}\text{C}$  NMR (175 MHz,  $\text{CDCl}_3$ )  $\delta$  163.1, 147.9, 138.0, 135.3,

134.5, 134.2, 132.3, 130.9, 130.2, 129.5, 129.4, 129.2( $\times 2$ ), 128.6, 128.5, 128.0, 126.7, 126.4,

124.4, 124.2, 120.1; IR (KBr)  $\bar{\nu}$  3334, 3057, 1642, 1495, 691; HRMS (ESI/Q-TOF)  $m/z$ : [M

+ H] $^+$  calcd for  $\text{C}_{27}\text{H}_{22}\text{NOS}$  408.1417; found 408.1423.

**[1,1'-biphenyl]-4-yl (Z)-3-((4-bromophenyl)thio)-3-phenylacrylate 7:**  $R_f = 0.4$  (10% ethyl

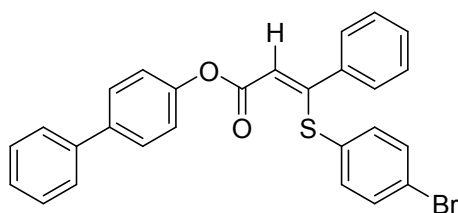

acetate in hexane); white solid; yield 42% (41 mg); mp

108-112  $^\circ\text{C}$ ;  $^1\text{H}$  NMR (400 MHz,  $\text{CDCl}_3$ )  $\delta$  7.56-7.51

(m, 4H), 7.43-7.27 (m, 5H), 7.22-7.12 (m, 6H), 6.98-

6.88 (m, 3H), 6.26 (s, 1H);  $^{13}\text{C}$  NMR (100 MHz,  $\text{CDCl}_3$ )  $\delta$  164.1, 161.9, 150.3, 140.6, 139.0,

137.9, 137.0, 135.5, 133.4, 131.8, 129.2, 128.9, 128.9, 128.3, 127.4, 127.3, 122.6, 122.1,

115.5; IR (KBr)  $\bar{\nu}$  3055, 2923, 2360, 1712, 690.

**(E)-3-([1,1'-biphenyl]-4-yl)-2-((4-bromophenyl)thio)-3-phenylacrylic acid 8<sup>6</sup>:**  $R_f = 0.5$

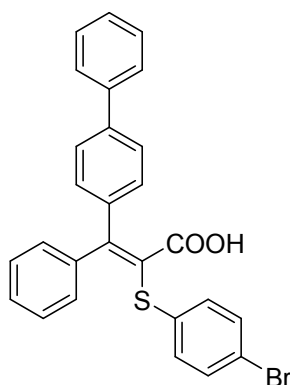

(40% ethyl acetate in hexane); yellow solid; yield 56% (54 mg);  $^1\text{H}$

NMR (400 MHz, DMSO)  $\delta$  12.99 (s, 1H), 7.68-7.65 (m, 4H), 7.55

(d,  $J = 8.4$  Hz, 2H), 7.46 (t,  $J = 7.6$  Hz, 2H), 7.42-7.37 (m, 3H),

7.36-7.33 (m, 3H), 7.31-7.28 (m, 4H);  $^{13}\text{C}$  NMR (100 MHz,

DMSO)  $\delta$  167.4, 149.6, 140.4, 140.1, 139.8, 139.3, 133.7, 132.0,

131.3, 129.1, 129.0, 128.8, 128.5, 128.3, 127.8, 126.6, 126.5, 125.9, 120.1; IR (KBr)  $\bar{\nu}$  3475, 2924, 1680, 698.

**N,3-diphenylpropiolamide 1a:**<sup>7</sup>  $R_f = 0.7$  (20% ethyl acetate in hexane); brownish white

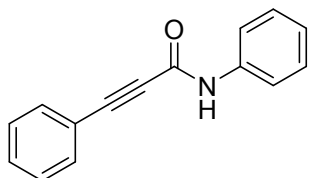

solid; yield 90% (650 mg); mp 126-128 °C (lit.<sup>7</sup>124-125 °C); <sup>1</sup>H NMR (400 MHz, CDCl<sub>3</sub>)  $\delta$  7.84 (s, 1H), 7.59-7.55 (m, 4H), 7.43 (t,  $J = 7.4$  Hz, 1H), 7.38-7.32 (m, 4H), 7.14 (t,  $J = 7.4$  Hz, 1H).

**3-phenyl-N-(p-tolyl)propiolamide 1b:**<sup>8</sup>  $R_f = 0.8$  (20% ethyl acetate in hexane); yellow solid;

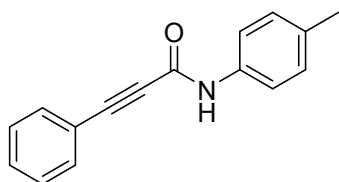

yield 91% (598 mg); mp 144-145 °C (lit.<sup>8</sup>143-145); <sup>1</sup>H NMR (400 MHz, CDCl<sub>3</sub>)  $\delta$  7.64 (s, 1H), 7.58-7.56 (m, 2H), 7.46-7.42 (m, 3H), 7.37 (t,  $J = 7.2$  Hz, 2H), 7.15 (d,  $J = 8.0$  Hz,

2H), 2.33 (s, 3H).

**N-(2,4-dimethylphenyl)-3-phenylpropiolamide 1c:**<sup>9</sup>  $R_f = 0.85$  (20% ethyl acetate in

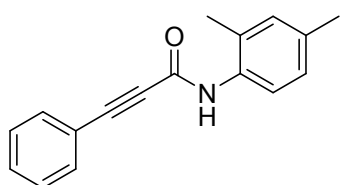

hexane); brown solid; yield 74% (450 mg); mp 136-138 °C; <sup>1</sup>H NMR (400 MHz, CDCl<sub>3</sub>)  $\delta$  7.67 (d,  $J = 7.2$  Hz, 1H), 7.59 (d,  $J = 8.0$  Hz, 2H), 7.46-7.43 (m, 1H), 7.38 (t,  $J = 7.2$  Hz, 2H),

7.31-7.26 (m, 1H), 7.09-7.02 (m, 2H), 2.31 (s, 3H), 2.29 (s, 3H).

**N-mesityl-3-phenylpropiolamide 1d:**  $R_f = 0.85$  (20% ethyl acetate in hexane); yellow solid;

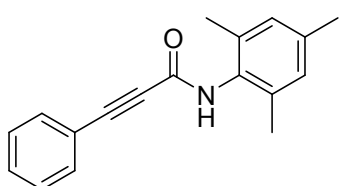

yield 63% (355 mg); mp 140-142 °C; <sup>1</sup>H NMR (400 MHz, DMSO)  $\delta$  10.02 (s, 1H), 7.58 (d,  $J = 7.2$  Hz, 2H), 7.48-7.40 (m, 3H), 6.83 (s, 2H), 2.16 (s, 3H), 2.06 (s, 6H); <sup>13</sup>C NMR (100

MHz, DMSO)  $\delta$  150.8, 136.2, 134.9, 132.3, 131.2, 130.4, 129.1, 128.4, 119.8, 84.1, 83.7,

20.5, 18.1; IR (KBr)  $\bar{\nu}$  3212, 2981, 2920, 2217, 1634; HRMS (ESI/Q-TOF)  $m/z$ :  $[M + Na]^+$  calcd for  $C_{18}H_{17}NONa$  286.1202; found 286.1216.

**N-(4-ethylphenyl)-3-phenylpropiolamide 1e:**  $R_f = 0.5$  (20% ethyl acetate in hexane);

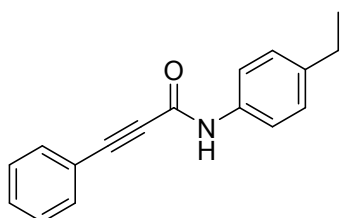

yellow solid; yield 93% (575 mg); mp 126-128 °C;  $^1H$  NMR (400 MHz,  $CDCl_3$ )  $\delta$  7.64 (s, 1H), 7.57 (d,  $J = 6.8$  Hz, 2H), 7.48 (d,  $J = 7.6$  Hz, 2H), 7.43 (d,  $J = 7.2$  Hz, 1H), 7.39-7.35 (m, 2H), 7.17 (d,  $J = 7.6$  Hz, 2H), 2.63 (q,  $J = 7.6$  Hz, 2H), 1.22 (t,

$J = 7.6$  Hz, 3H);  $^{13}C$  NMR (100 MHz,  $CDCl_3$ )  $\delta$  141.1, 135.2, 132.7, 130.3, 128.6, 128.4, 120.35, 120.30, 120.1, 85.7, 83.7, 28.4, 15.7; IR (KBr)  $\bar{\nu}$  3262, 2964, 2209, 1636; HRMS (ESI/Q-TOF)  $m/z$ :  $[M + H]^+$  calcd for  $C_{17}H_{16}NO$  250.1226; found 250.1235.

**N-(4-isopropylphenyl)-3-phenylpropiolamide 1f:**  $R_f = 0.6$  (20% ethyl acetate in hexane);

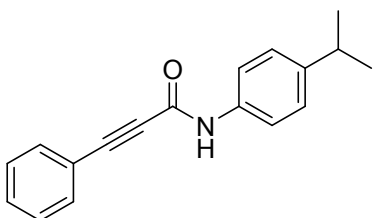

brown solid; yield 82% (480 mg); mp 133-136 °C;  $^1H$  NMR (400 MHz,  $CDCl_3$ )  $\delta$  7.58 (d,  $J = 7.6$  Hz, 2H), 7.52 (s, 1H), 7.47 (d,  $J = 8.4$  Hz, 2H), 7.44 (d,  $J = 7.2$  Hz, 1H), 7.38 (t,  $J = 7.6$  Hz, 2H), 7.21 (d,  $J = 8.4$  Hz, 2H), 2.90 (sept,  $J = 6.8$  Hz,

1H), 1.24 (d,  $J = 6.8$  Hz, 6H);  $^{13}C$  NMR (100 MHz,  $CDCl_3$ )  $\delta$  151.0, 145.9, 135.1, 132.7, 130.4, 128.7, 127.2, 120.25, 120.17, 85.7, 83.6, 33.8, 24.1; IR (KBr)  $\bar{\nu}$  3259, 2956, 2209, 1639; HRMS (ESI/Q-TOF)  $m/z$ :  $[M + H]^+$  calcd for  $C_{18}H_{18}NO$  264.1383; found 264.1394.

**N-(4-(tert-butyl)phenyl)-3-phenylpropiolamide 1g:**  $R_f = 0.8$  (20% ethyl acetate in hexane);

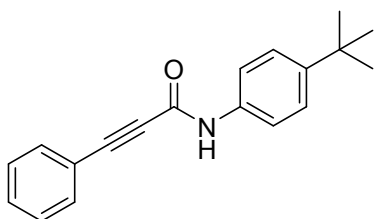

yellow solid; yield 87% (489 mg); mp 148-150 °C;  $^1H$  NMR (400 MHz,  $CDCl_3$ )  $\delta$  7.58 (d,  $J = 8.0$  Hz, 2H), 7.52 (s, 1H); 7.51-7.47 (m, 2H), 7.43 (d,  $J = 7.2$  Hz, 1H), 7.40-7.36 (m,

4H), 1.31 (s, 9H);  $^{13}\text{C}$  NMR (100 MHz,  $\text{CDCl}_3$ )  $\delta$  151.1, 148.1, 134.8, 132.7, 130.4, 128.7, 126.1, 120.2, 119.9, 85.7, 83.7, 34.6, 31.4; IR (KBr)  $\bar{\nu}$  3258, 3055, 2962, 2211, 1632; HRMS (ESI/Q-TOF)  $m/z$ :  $[\text{M} + \text{Na}]^+$  calcd for  $\text{C}_{19}\text{H}_{19}\text{NONa}$  300.1359; found 300.1344.

**N-(4-methoxyphenyl)-3-phenylpropiolamide 1h:**<sup>10</sup>  $R_f = 0.4$  (20% ethyl acetate in hexane);

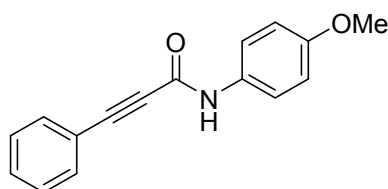

brownish solid; yield 93% (570 mg); mp 128-130 °C;  $^1\text{H}$  NMR (400 MHz,  $\text{CDCl}_3$ )  $\delta$  7.58-7.56 (m, 2H), 7.48 (d,  $J = 8.8$  Hz, 2H), 7.43 (d,  $J = 7.2$  Hz, 1H), 7.39-7.36 (m, 2H),

7.32-7.30 (m, 1H), 6.88 (d,  $J = 8.8$  Hz, 2H), 3.80 (s, 3H).

**N-([1,1'-biphenyl]-4-yl)-3-phenylpropiolamide 1i:**  $R_f = 0.7$  (20% ethyl acetate in hexane);

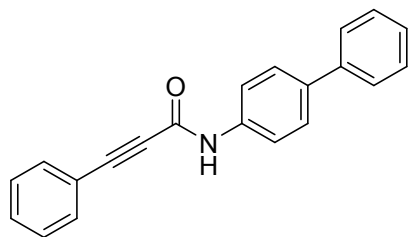

yellow solid; yield 75% (399 mg); mp 184-186 °C;  $^1\text{H}$  NMR (400 MHz,  $\text{CDCl}_3$ )  $\delta$  7.66-7.64 (m, 3H), 7.60-7.57 (m, 6H), 7.47-7.32 (m, 6H);  $^{13}\text{C}$  NMR (100 MHz,  $\text{CDCl}_3$ )  $\delta$  151.1, 140.5, 138.0, 136.7, 132.8, 130.5, 129.0, 128.8,

127.9, 127.4, 127.0, 120.4, 120.1, 86.0, 83.6; IR (KBr)  $\bar{\nu}$  3258, 2923, 2359, 1639; HRMS (ESI/Q-TOF)  $m/z$ :  $[\text{M} + \text{H}]^+$  calcd for  $\text{C}_{21}\text{H}_{16}\text{NO}$  298.1226; found 298.1227.

**N-(2-fluorophenyl)-3-phenylpropiolamide 1j:**  $R_f = 0.8$  (20% ethyl acetate in hexane);

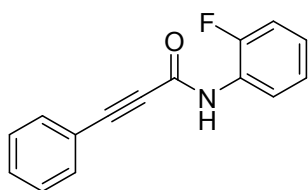

yellow solid; yield 85% (550 mg); mp 110-113 °C;  $^1\text{H}$  NMR (400 MHz,  $\text{CDCl}_3$ )  $\delta$  8.35 (t,  $J = 8.0$  Hz, 1H), 7.77 (s, 1H), 7.60 (d,  $J = 7.6$  Hz, 2H), 7.49-7.44 (m, 1H), 7.40 (t,  $J = 8.0$  Hz, 2H), 7.17-7.08

(m, 3H);  $^{13}\text{C}$  NMR (100 MHz,  $\text{CDCl}_3$ )  $\delta$  153.4, 151.00, 150.9, 132.8, 130.6, 128.7, 125.1 (d,  $^3J_{\text{CF}} = 7.6$  Hz), 124.8 (d,  $^4J_{\text{CF}} = 3.5$  Hz), 122.1, 119.9, 115.0 (d,  $^2J_{\text{CF}} = 19.1$  Hz), 86.3, 83.3;

IR (KBr)  $\bar{\nu}$  3232, 2212, 1649, 1322; HRMS (ESI/Q-TOF)  $m/z$ :  $[M + Na]^+$  calcd for  $C_{15}H_{10}FNONa$  262.0639; found 262.0629.

**N-(2-chlorophenyl)-3-phenylpropiolamide 1k:**<sup>11</sup>  $R_f = 0.8$  (20% ethyl acetate in hexane);

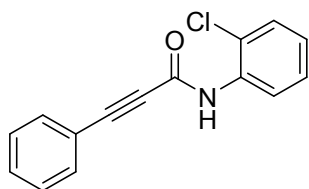

off white solid; yield 84% (620 mg); mp 104-105 °C; <sup>1</sup>H NMR (400 MHz, CDCl<sub>3</sub>)  $\delta$  8.40 (d,  $J = 8.4$  Hz, 1H), 8.00 (s, 1H), 7.62 (d,  $J = 7.2$  Hz, 2H), 7.48-7.45 (m, 1H), 7.42-7.38 (m, 3H), 7.31 (t,  $J = 8.0$  Hz, 1H), 7.09 (t,  $J = 7.6$  Hz, 1H).

**N-(2-bromophenyl)-3-phenylpropiolamide 1l:**<sup>11</sup>  $R_f = 0.6$  (20% ethyl acetate in hexane);

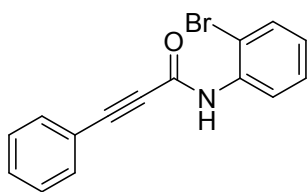

yellowish white solid; yield 76% (401 mg); mp 101-103 °C; <sup>1</sup>H NMR (400 MHz, CDCl<sub>3</sub>)  $\delta$  8.38 (d,  $J = 8.0$  Hz, 1H), 7.99 (s, 1H), 7.63-7.56 (m, 3H), 7.48-7.45 (m, 1H), 7.42-7.38 (m, 2H), 7.35 (t,  $J = 7.6$  Hz, 1H), 7.03 (t,  $J = 7.4$  Hz, 1H).

**N-(2-iodophenyl)-3-phenylpropiolamide 1m:**<sup>11</sup>  $R_f = 0.8$  (20% ethyl acetate in hexane);

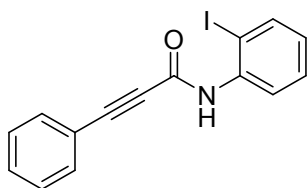

brown solid; yield 66% (315 mg); mp 100-103 °C; <sup>1</sup>H NMR (400 MHz, CDCl<sub>3</sub>)  $\delta$  8.27 (s, 1H), 7.82 (d,  $J = 7.6$  Hz, 2H), 7.62 (d,  $J = 7.2$  Hz, 2H), 7.42-7.36 (m, 4H), 6.89 (t,  $J = 7.2$  Hz, 1H).

**N-(4-cyanophenyl)-3-phenylpropiolamide 1n:**  $R_f = 0.3$  (20% ethyl acetate in hexane);

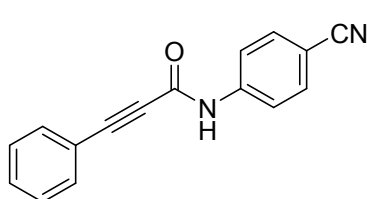

brown solid; yield 64% (401 mg); mp 156-158 °C; <sup>1</sup>H NMR (400 MHz, CDCl<sub>3</sub>)  $\delta$  7.77 (s, 1H), 7.71 (d,  $J = 8.8$  Hz, 2H), 7.64 (d,  $J = 8.8$  Hz, 2H), 7.59 (d,  $J = 7.6$  Hz, 2H), 7.48 (t,  $J = 7.6$  Hz, 1H), 7.40 (t,  $J = 7.6$  Hz, 2H); <sup>13</sup>C NMR (175 MHz, CDCl<sub>3</sub>)  $\delta$  151.1, 141.4, 133.5,



132.9, 130.9, 128.9, 119.8, 119.5, 118.7, 108.0, 87.3, 83.0; IR (KBr)  $\bar{\nu}$  3288, 2923, 2210, 1650, 1592; HRMS (ESI/Q-TOF)  $m/z$ :  $[M + H]^+$  calcd for  $C_{16}H_{11}N_2O$  247.0866; found 247.0859.

**N-(4-nitrophenyl)-3-phenylpropiolamide 1o**:  $R_f = 0.45$  (20% ethyl acetate in hexane);

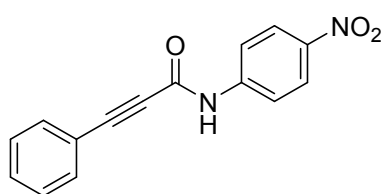

yellowish white solid; yield 67% (389 mg); mp 166-168 °C;  $^1H$  NMR (400 MHz,  $CDCl_3$ )  $\delta$  8.24 (d,  $J = 8.8$  Hz, 2H), 7.91 (s, 1H), 7.76 (d,  $J = 8.8$  Hz, 2H), 7.59 (d,  $J = 7.6$  Hz, 2H),

7.50-7.45 (m, 1H), 7.42-7.36 (m, 2H);  $^{13}C$  NMR (100 MHz,  $CDCl_3$ )  $\delta$  151.4, 144.0, 143.2, 133.2, 132.8, 131.0, 128.8, 125.3, 119.5, 87.7, 82.9; IR (KBr)  $\bar{\nu}$  3266, 2207, 1642, 1552, 1331; HRMS (ESI/Q-TOF)  $m/z$ :  $[M + H]^+$  calcd for  $C_{15}H_{10}N_2O_3$  267.0764; found 267.0767.

**N-(3-chlorophenyl)-3-phenylpropiolamide 1p**:<sup>12</sup>  $R_f = 0.6$  (20% ethyl acetate in hexane);

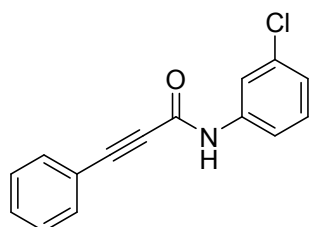

brown solid; yield 95% (686 mg); mp 110-112 °C;  $^1H$  NMR (400 MHz,  $CDCl_3$ )  $\delta$  7.69 (s, 1H), 7.59-7.56 (m, 2H), 7.47-7.36 (m, 4H), 7.29-7.26 (m, 2H), 7.13 (d,  $J = 8.0$  Hz, 1H).

**N-(4-chloro-2-methylphenyl)-3-phenylpropiolamide 1q**:  $R_f = 0.55$  (20% ethyl acetate in

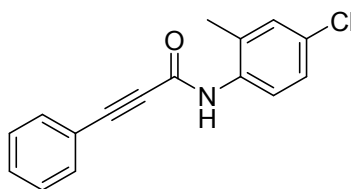

hexane); off white solid; yield 86% (585 mg); mp 146-148 °C;  $^1H$  NMR (400 MHz,  $CDCl_3$ )  $\delta$  7.84 (d,  $J = 8.8$  Hz, 1H), 7.60 (d,  $J = 7.2$  Hz, 2H), 7.48-7.44 (m, 1H), 7.40 (t,  $J = 7.4$  Hz,

2H), 7.30 (s, 1H), 7.21 (s, 2H), 2.32 (s, 3H);  $^{13}C$  NMR (100 MHz,  $CDCl_3$ )  $\delta$  151.3, 133.7, 132.8, 130.95, 130.92, 130.6, 130.5, 128.8, 127.1, 124.5, 119.9, 86.2, 83.3, 17.9; IR (KBr)  $\bar{\nu}$  3195, 2359, 1628, 1518, 756; HRMS (ESI/Q-TOF)  $m/z$ :  $[M + H]^+$  calcd for  $C_{16}H_{13}ClNO$  270.0680; found 270.0686.

**N-benzyl-3-phenylpropiolamide 1r:**<sup>13</sup>  $R_f = 0.6$  (20% ethyl acetate in hexane); yellowish

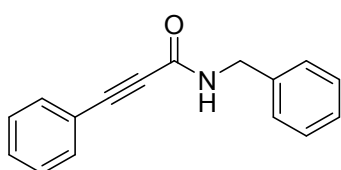

white solid; yield 90% (586 mg); mp 116-118 °C (lit<sup>13</sup>.108-110 °C); <sup>1</sup>H NMR (400 MHz, CDCl<sub>3</sub>)  $\delta$  7.53-7.51 (m, 2H), 7.43-7.40 (m, 2H), 7.37-7.31 (m, 7H), 4.55 (d,  $J = 6.0$  Hz, 2H).

**N-(naphthalen-1-yl)-3-phenylpropiolamide (1s):**<sup>14</sup>  $R_f = 0.45$  (10% ethyl acetate in hexane);

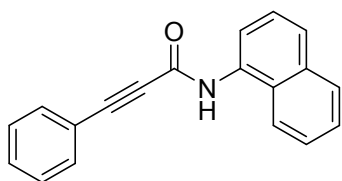

yellow solid; yield 61% (350 mg); mp 177-181 °C; <sup>1</sup>H NMR (400 MHz, CDCl<sub>3</sub>)  $\delta$  8.02 (d,  $J = 7.2$  Hz, 1H), 7.95 (d,  $J = 7.8$  Hz, 2H), 7.90 (d,  $J = 7.8$  Hz, 1H), 7.75 (d,  $J = 8.2$  Hz, 1H), 7.64 (d,  $J = 7.4$  Hz, 2H), 7.59-7.51 (m, 3H), 7.50-7.47 (m, 1H), 7.43-7.39 (m, 2H).

**3-phenyl-N-(quinolin-3-yl)propiolamide (1t):**  $R_f = 0.35$  (30% ethyl acetate in hexane);

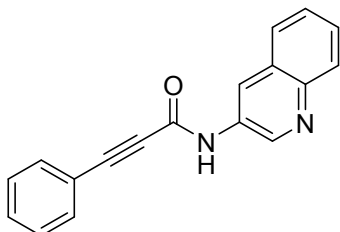

white solid; yield 35% (200 mg); mp 154-156 °C; <sup>1</sup>H NMR (400 MHz, CDCl<sub>3</sub>)  $\delta$  8.87 (s, 1H), 8.85 (s, 1H), 8.05 (d,  $J = 8.4$  Hz, 1H), 7.81 (d,  $J = 8.2$  Hz, 1H), 7.64 (t,  $J = 7.6$  Hz, 1H), 7.55 (d,  $J = 7.4$  Hz, 2H), 7.51-7.48 (m, 2H), 7.42-7.39 (m, 1H), 7.33-7.30 (m, 2H); IR (KBr)  $\bar{\nu}$  3345, 2929, 2360, 1663; HRMS (ESI/Q-TOF)  $m/z$ :  $[M + H]^+$  calcd for C<sub>18</sub>H<sub>13</sub>N<sub>2</sub>O 273.1022; found 273.1037.

**N-([1,1'-biphenyl]-2-yl)-3-phenylpropiolamide (1u):**<sup>11</sup>  $R_f = 0.6$  (20% ethyl acetate in

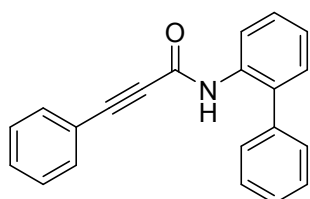

hexane); brownish white solid; yield 62% (330 mg); mp 171-174 °C; <sup>1</sup>H NMR (400 MHz, CDCl<sub>3</sub>)  $\delta$  8.33 (d,  $J = 8.2$  Hz, 1H), 7.54-7.46 (m, 5H), 7.44-7.38 (m, 5H), 7.36-7.32 (m, 2H), 7.29 (d,  $J = 7.2$  Hz, 1H), 7.24-7.20 (m, 1H).

## References

1. SAINT+, Bruker AXS Inc., Madison, Wisconsin, USA, 1999 (Program for Reduction of Data collected on Bruker CCD Area Detector Diffractometer V. 6.02.)
2. SADABS, Bruker AXS, Madison, Wisconsin, USA, 2004
3. G. Sheldrick, *Acta Crystallogr. Sect. A*, 2008, **64**, 112.
4. SAINT+, Bruker AXS Inc., Madison, Wisconsin, USA, 1999 (Program for Reduction of Data collected on Bruker CCD Area Detector Diffractometer V. 6.02.)
5. SADABS, Bruker AXS, Madison, Wisconsin, USA, 2004
6. H. Sahoo, S. Singh and M. Baidya, *Org. Lett.*, 2018, **20**, 3678.
7. I. Schäfer and T. Opatz, *Synthesis*, 2011, 1691.
8. M. Kissane, M. Murphy, E. O'Brien, J. Chopra, L. Murphy, S. G. Collins, S. E. Lawrence and A. R. Maguire, *Org. Biomol. Chem.*, 2011, **9**, 2452.
9. D. Qian and J. Zhang, *Chem. Commun.*, 2012, **48**, 7082.
10. M. Barreau and G. Ponsinet, *Synthesis*, 1987, 262.
11. C.-S. Wang, T. Roisnel, P. H. Dixneuf and J.-F. Soulé, *Adv. Synth. Catal.*, 2019, **361**, 445.
12. H.-L. Hua, Y.-T. He, Y.-F. Qiu, Y.-X. Li, B. Song, P. Gao, X.-R. Song, D.-H. Guo, X.-Y. Liu and Y.-M. Liang, *Chem. Eur. J.*, 2015, **21**, 1468.
13. M. Sayes and A. B. Charette, *Green Chem.*, 2017, **19**, 5060.
14. H.-L. Hua, Y.-T. He, Y.-F. Qiu, Y.-X. Li, B. Song, P. Gao, X.-R. Song, D.-H. Guo, X.-Y. Liu and Y.-M. Liang, *Chem. Eur. J.*, 2015, **21**, 1468.

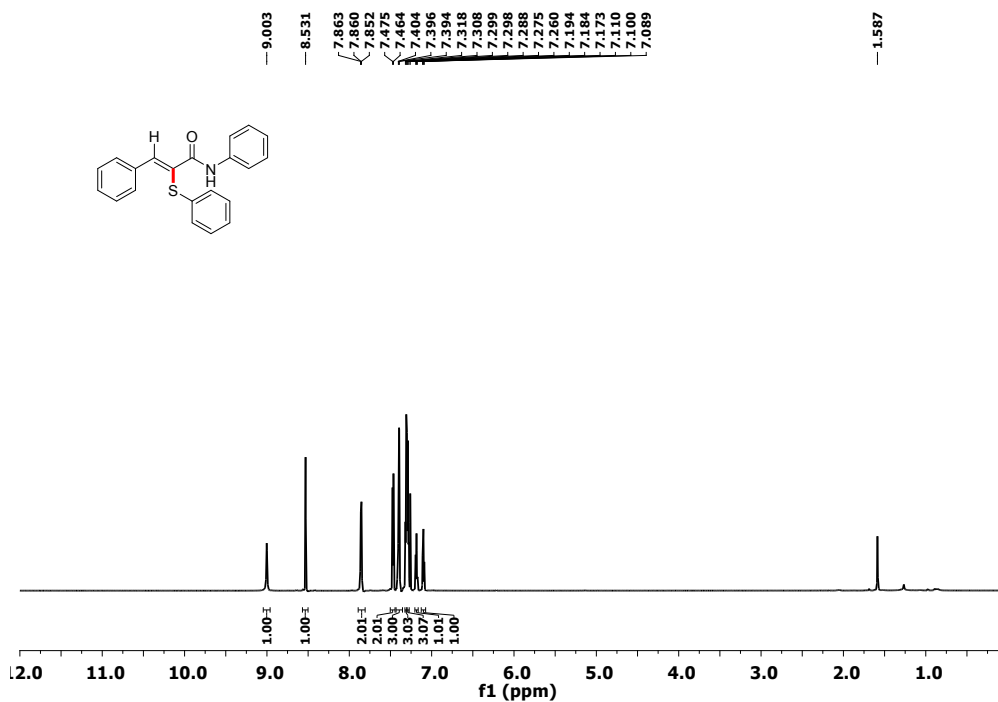

Fig. S15. <sup>1</sup>H NMR spectrum of (Z)-N,3-diphenyl-2-(phenylthio)acrylamide (3aa)

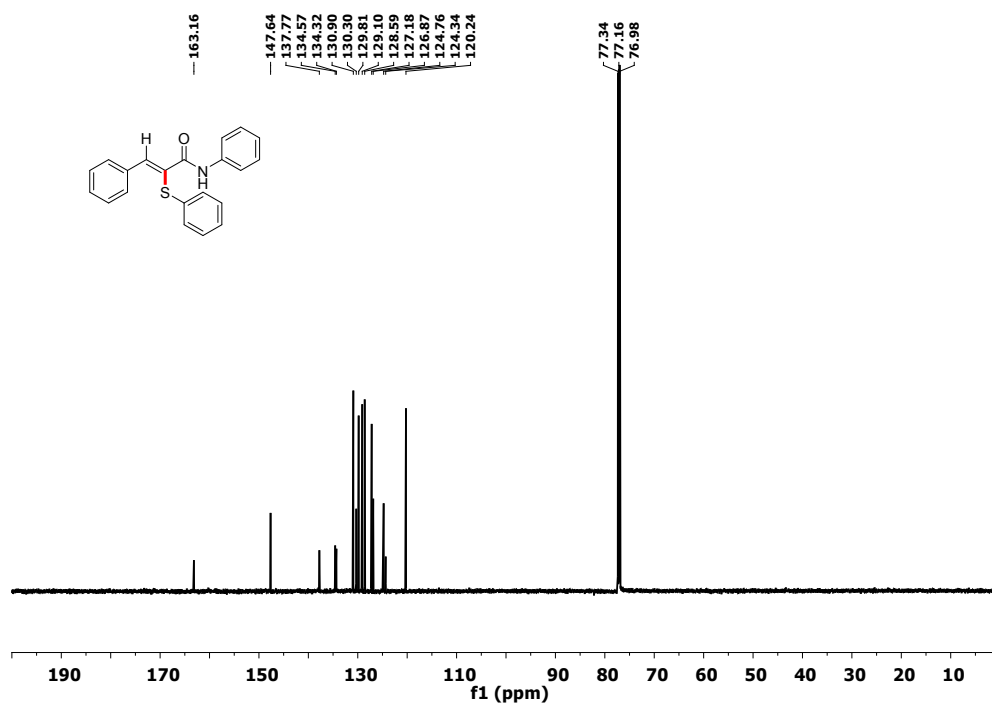

Fig. S16. <sup>13</sup>C NMR spectrum of (Z)-N,3-diphenyl-2-(phenylthio)acrylamide (3aa)

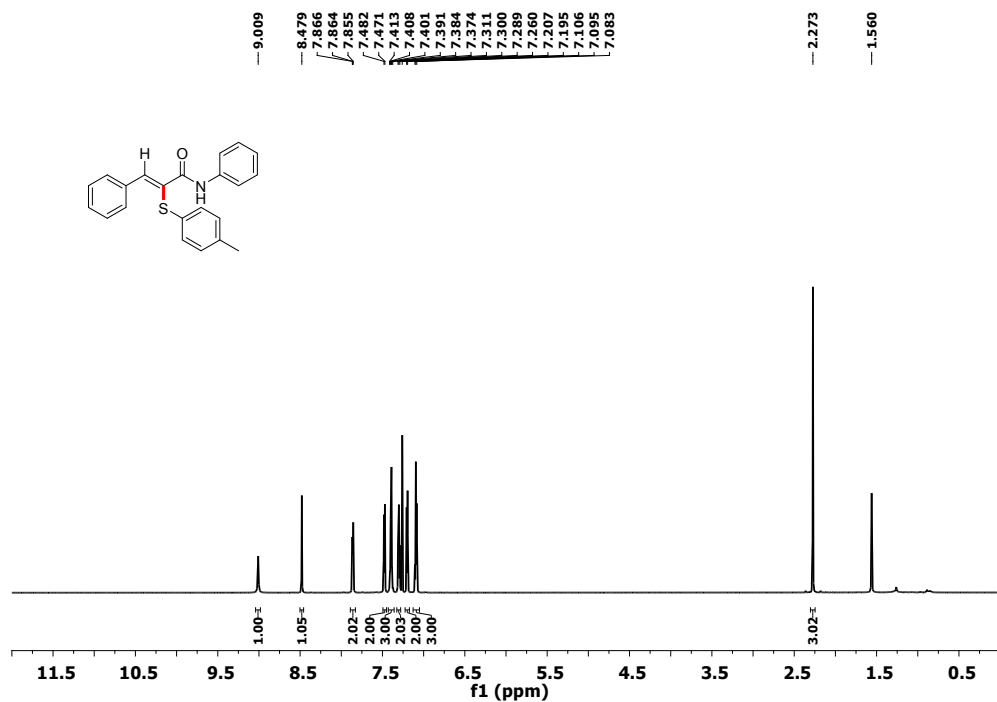

Fig. S17. <sup>1</sup>H NMR spectrum of (Z)-N,3-diphenyl-2-(p-tolylthio)acrylamide (**3ab**)

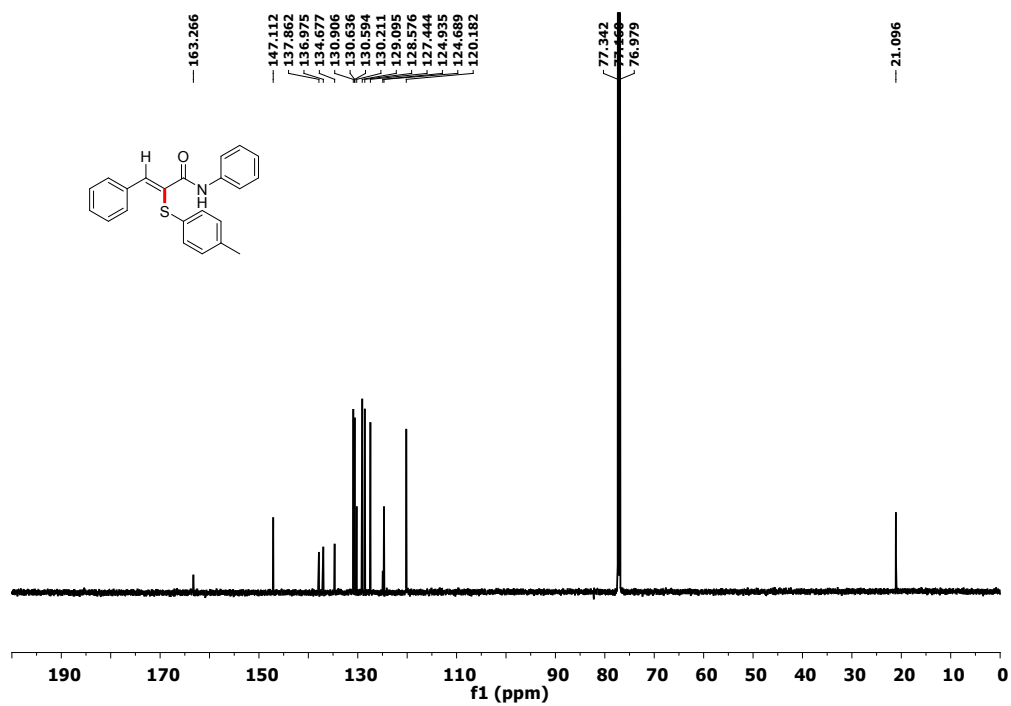

Fig. S18. <sup>13</sup>C NMR spectrum of (Z)-N,3-diphenyl-2-(p-tolylthio)acrylamide (**3ab**)

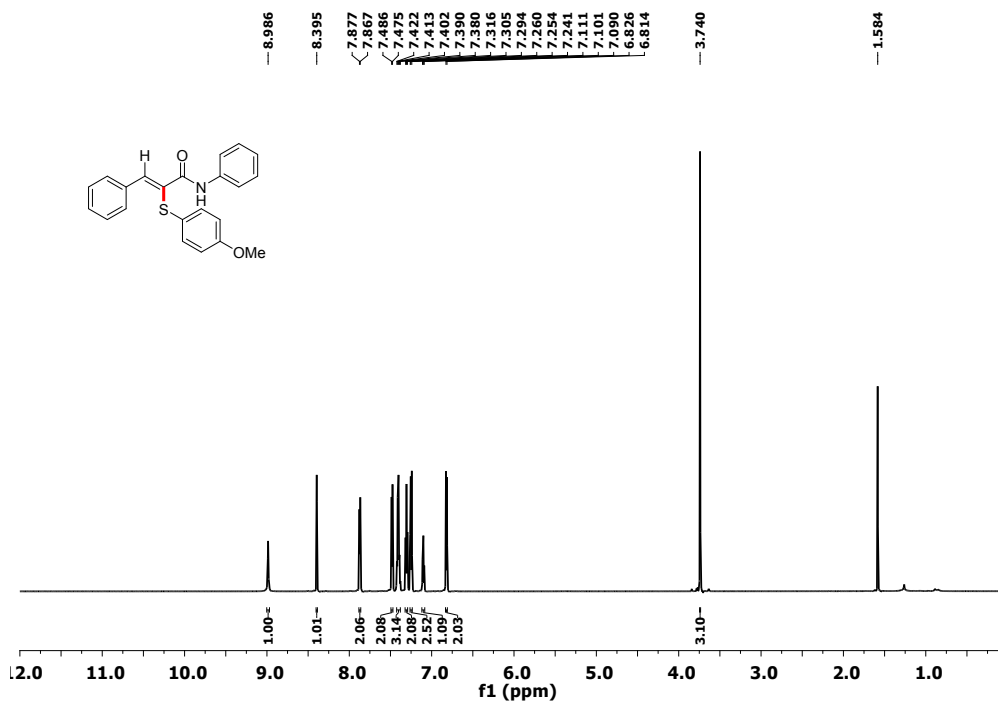

Fig. S19. <sup>1</sup>H NMR spectrum of (Z)-2-((4-methoxyphenyl)thio)-N,3-diphenylacrylamide (**3ac**)

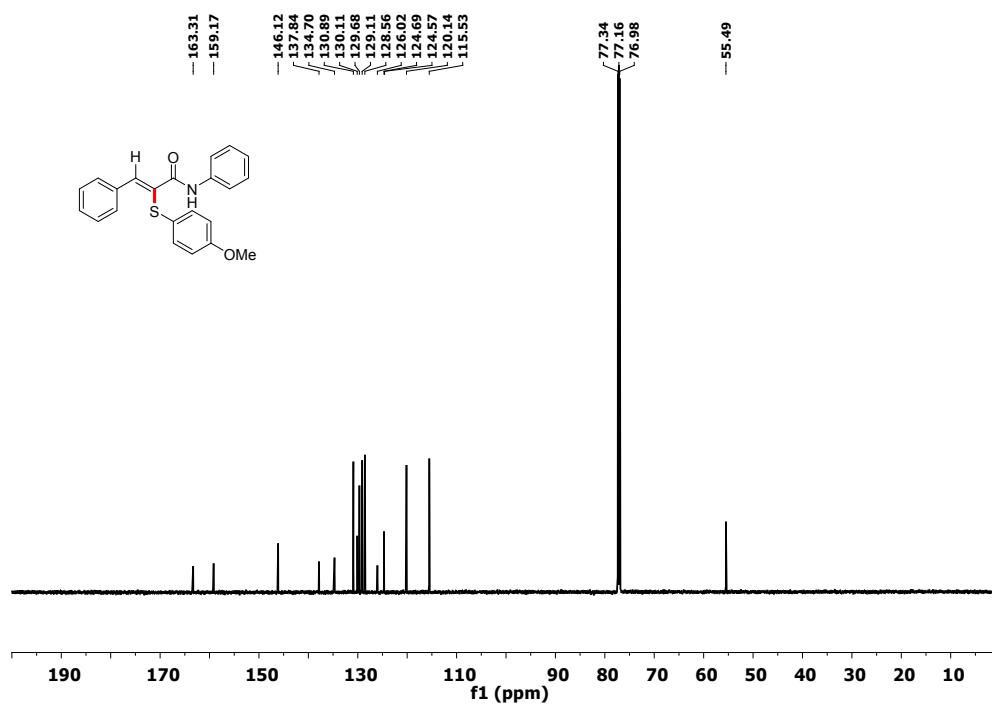

Fig. S20. <sup>13</sup>C NMR spectrum of (Z)-2-((4-methoxyphenyl)thio)-N,3-diphenylacrylamide (**3ac**)

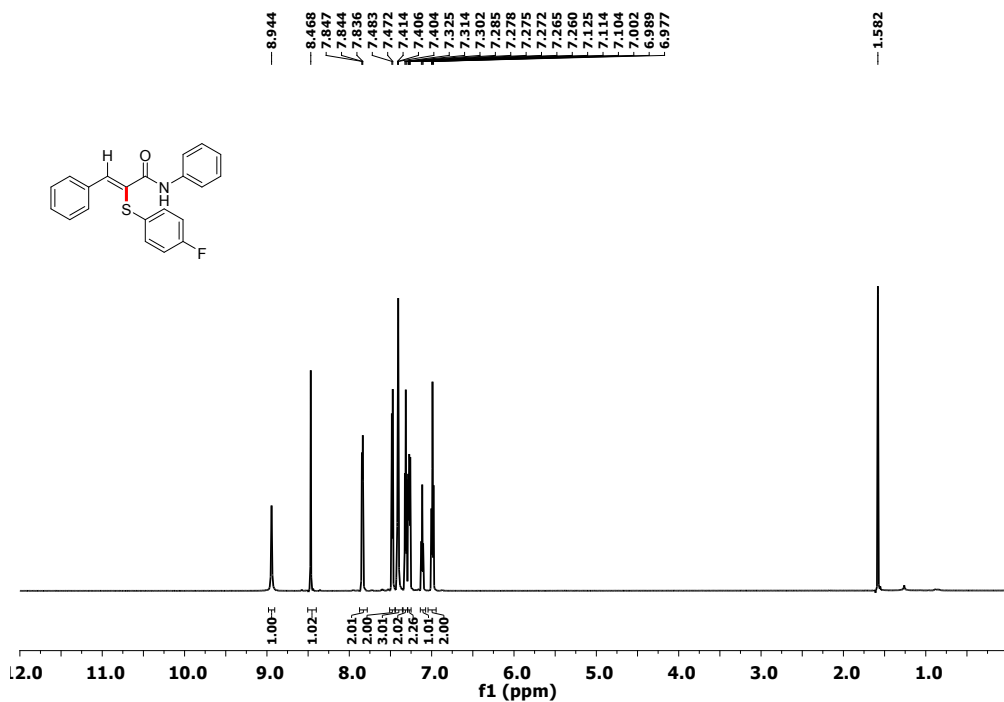

Fig. S21. <sup>1</sup>H NMR spectrum of (Z)-2-((4-fluorophenyl)thio)-N,3-diphenylacrylamide (**3ad**)

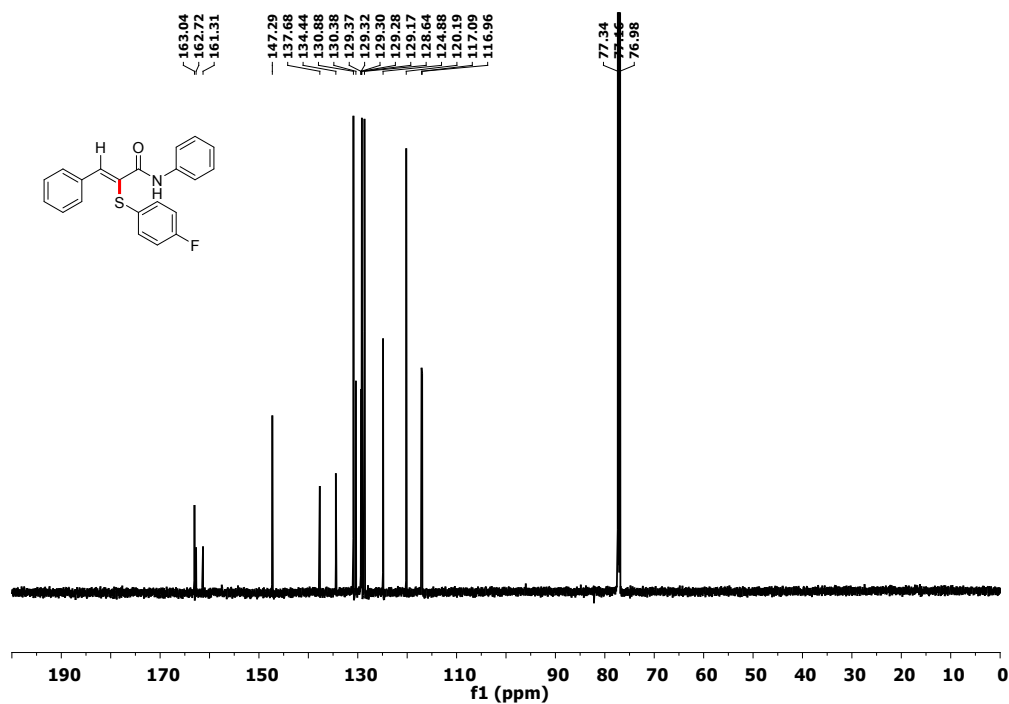

Fig. S22. <sup>13</sup>C NMR spectrum of (Z)-2-((4-fluorophenyl)thio)-N,3-diphenylacrylamide (**3ad**)

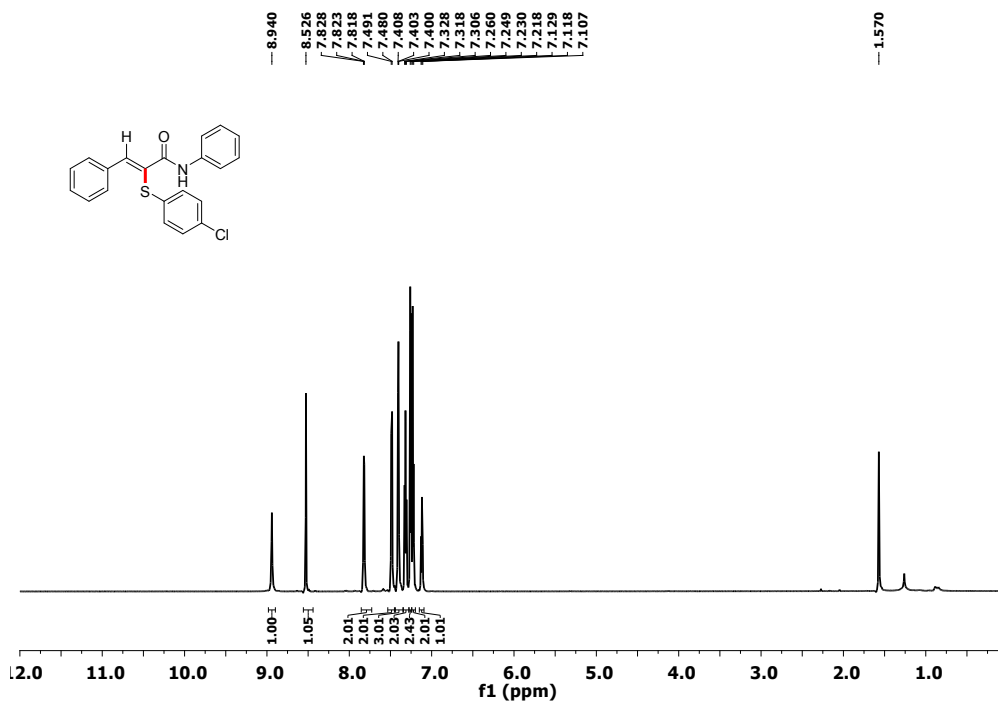

**Fig. S23.** <sup>1</sup>H NMR spectrum of (Z)-2-((4-chlorophenyl)thio)-N,3-diphenylacrylamide (**3ae**)

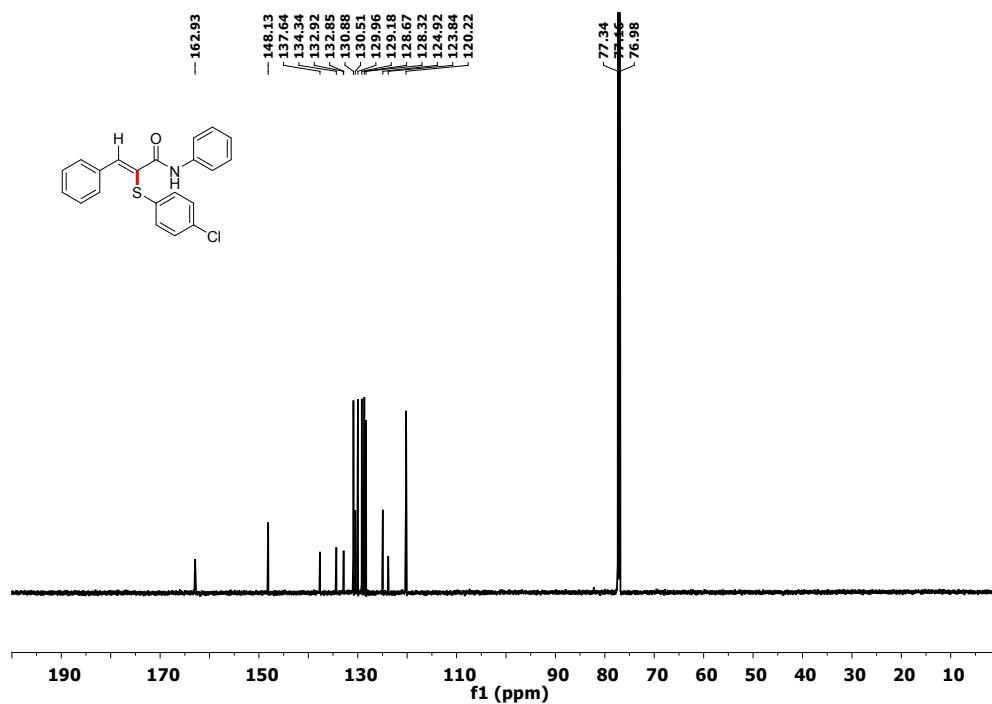

**Fig. S24.** <sup>13</sup>C NMR spectrum of (Z)-2-((4-chlorophenyl)thio)-N,3-diphenylacrylamide (**3ae**)



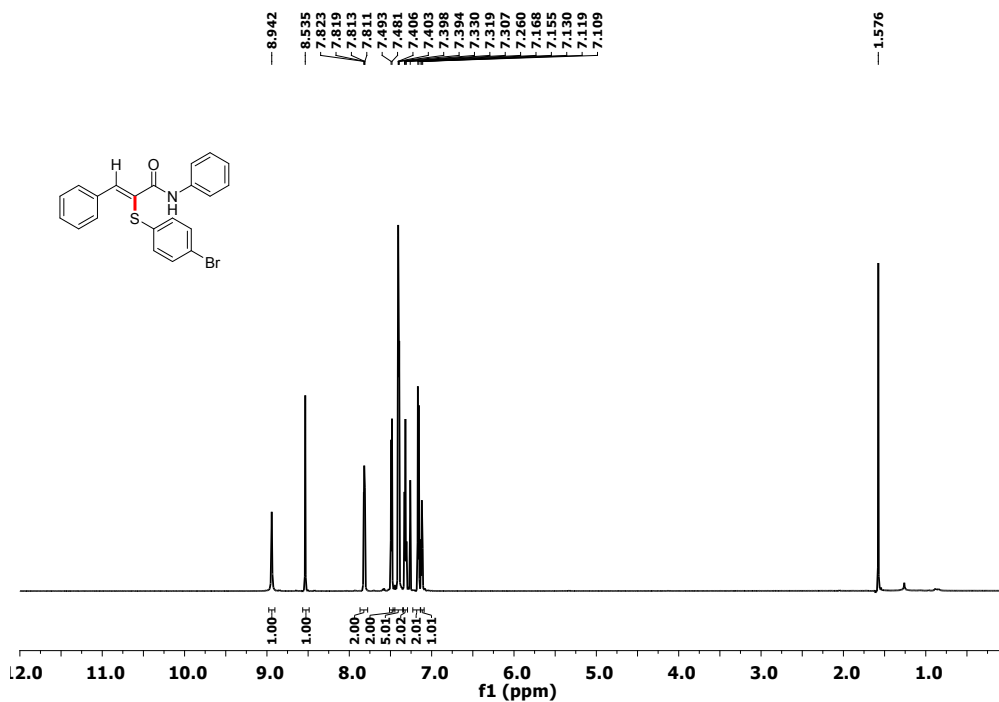

Fig. S25. <sup>1</sup>H NMR spectrum of (Z)-2-((4-bromophenyl)thio)-N,3-diphenylacrylamide (**3af**)

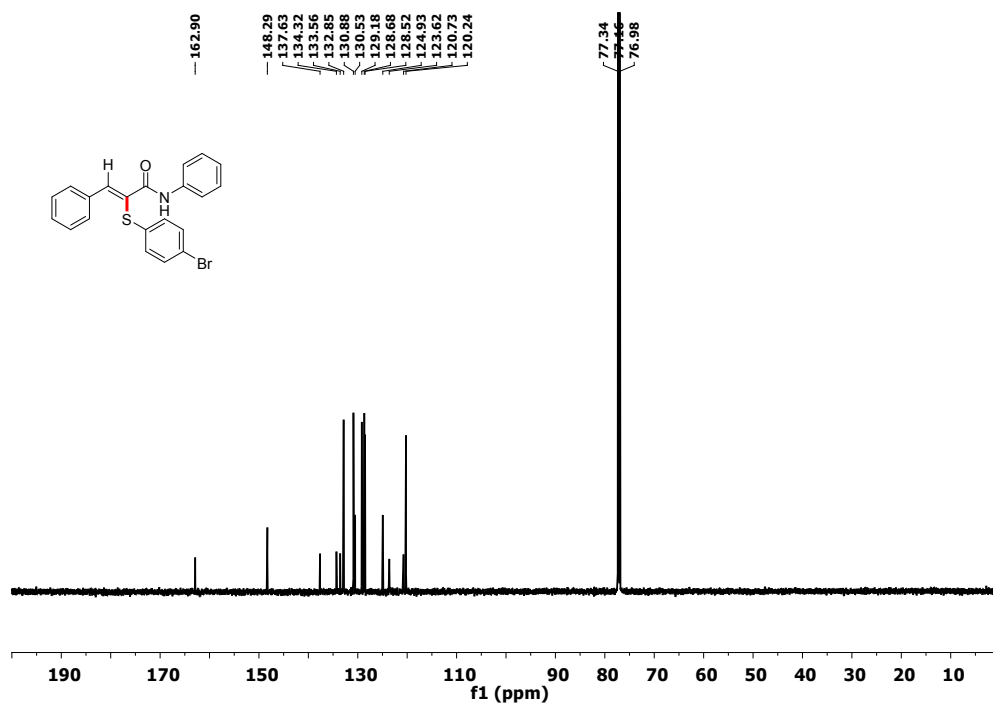

Fig. S26. <sup>13</sup>C NMR spectrum of (Z)-2-((4-bromophenyl)thio)-N,3-diphenylacrylamide (**3af**)

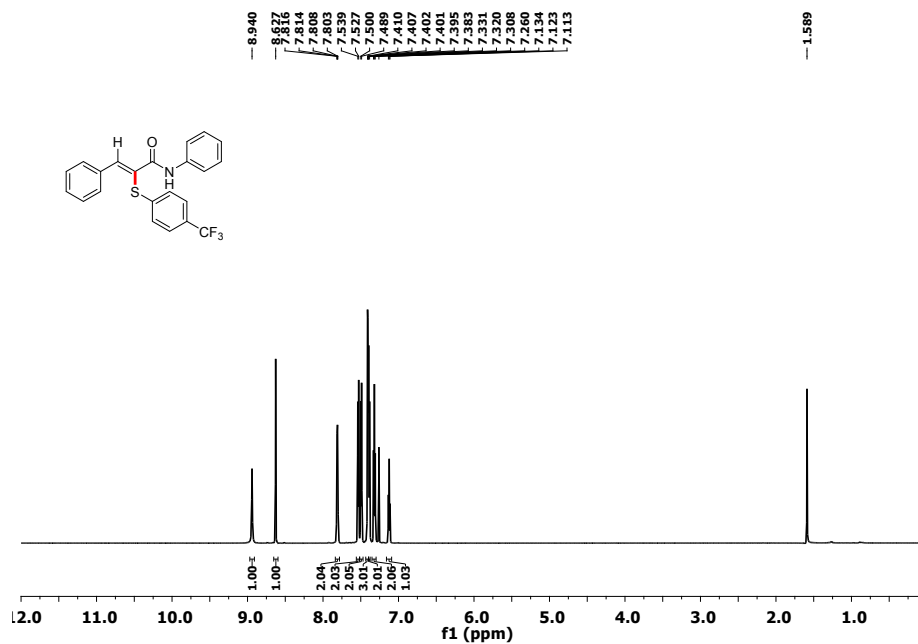

Fig.S27. <sup>1</sup>H NMR spectrum of (Z)-N,3-diphenyl-2-((4(trifluoromethyl)phenyl)thio)acrylamide (3ag)

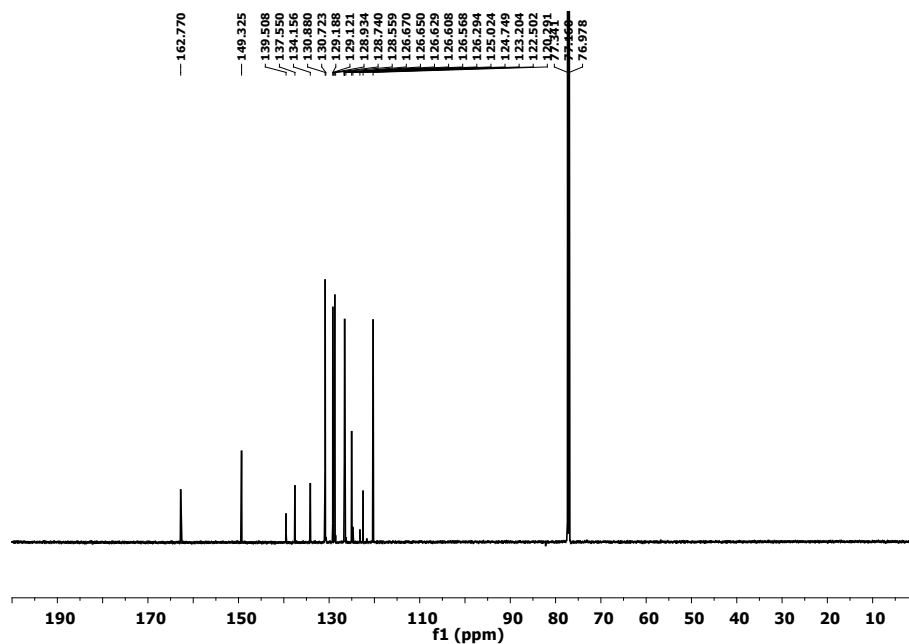

Fig. S28. <sup>13</sup>C NMR spectrum of (Z)-N,3-diphenyl-2-((4-(trifluoromethyl)phenyl)thio)acrylamide (3ag)

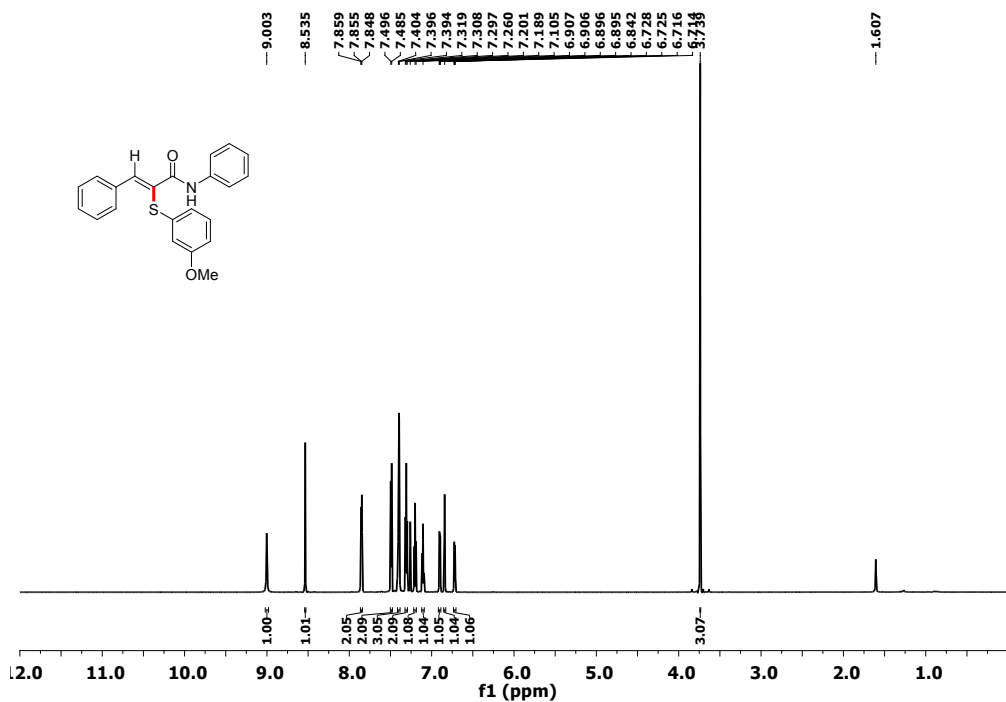

**Fig. S29.** <sup>1</sup>H NMR spectrum of (Z)-2-((3-methoxyphenyl)thio)-N,3-diphenylacrylamide (3ah)

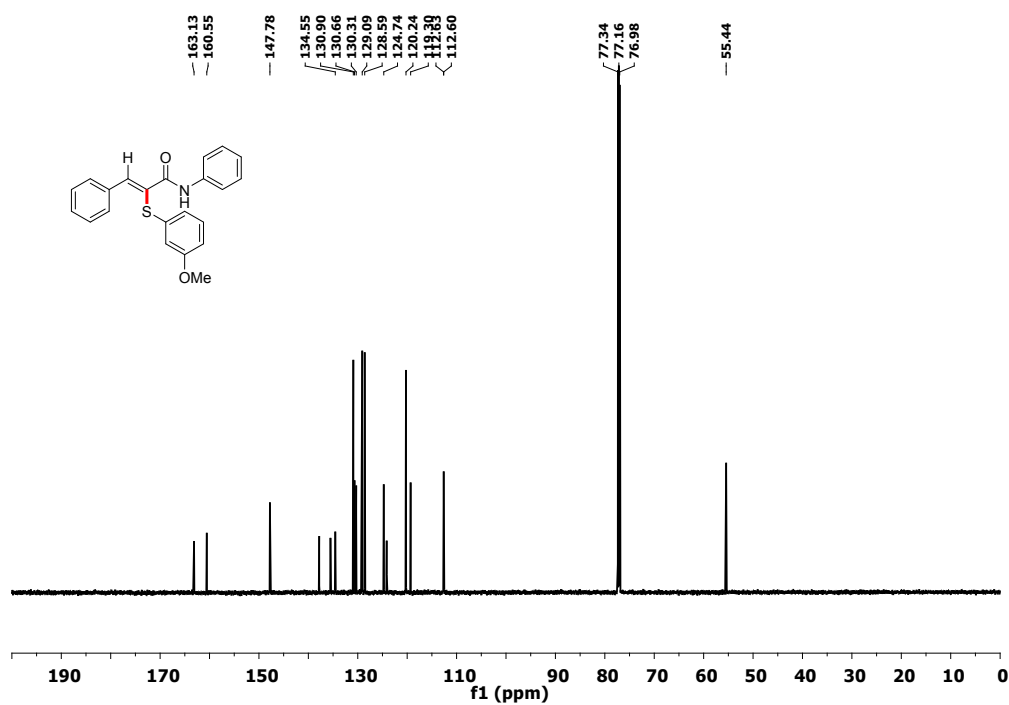

**Fig. S30.** <sup>13</sup>C NMR spectrum of (Z)-2-((3-methoxyphenyl)thio)-N,3-diphenylacrylamide (3ah)

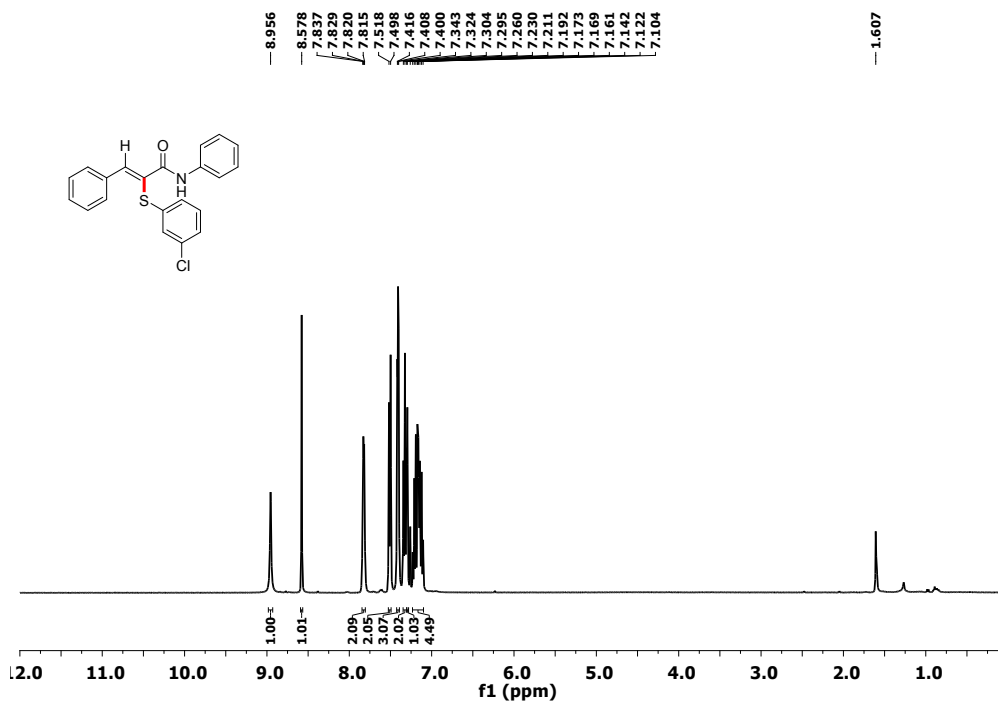

Fig. S31. <sup>1</sup>H NMR spectrum of (Z)-2-((3-chlorophenyl)thio)-N,3-diphenylacrylamide (3ai)

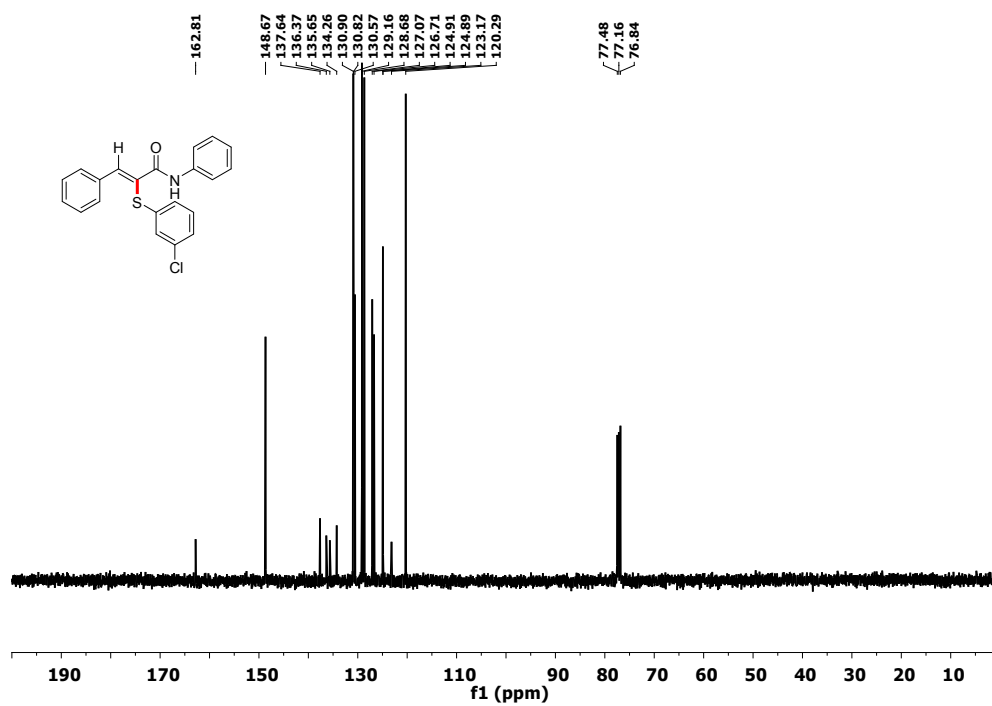

Fig. S32. <sup>13</sup>C NMR spectrum of (Z)-2-((3-chlorophenyl)thio)-N,3-diphenylacrylamide (3ai)

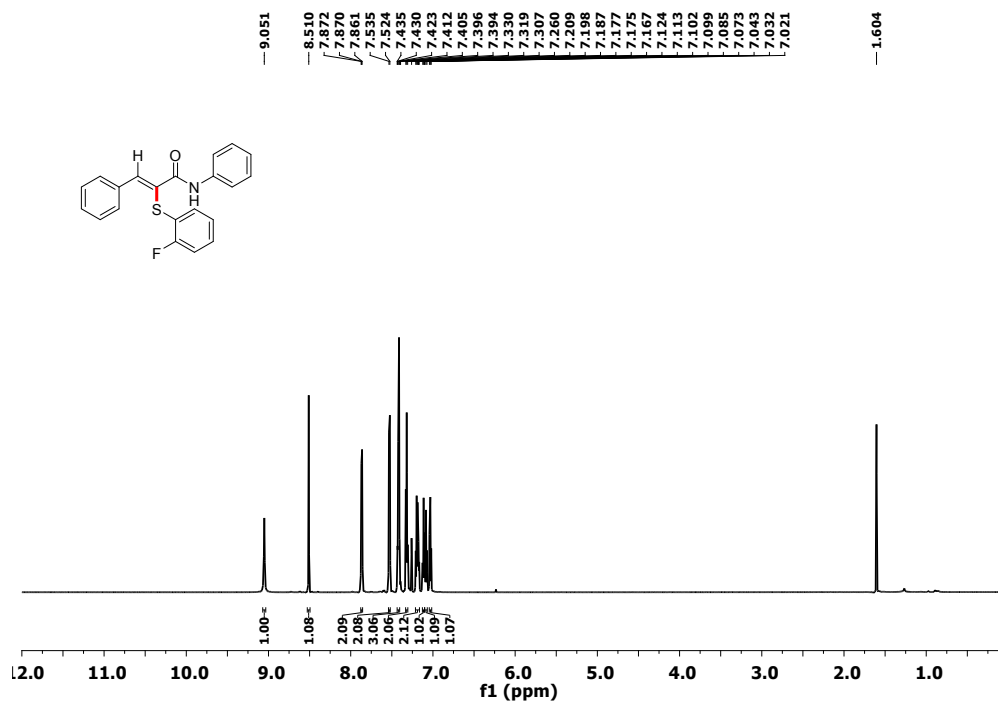

Fig. S33. <sup>1</sup>H NMR spectrum of (Z)-2-((2-fluorophenyl)thio)-N,3-diphenylacrylamide (3aj)

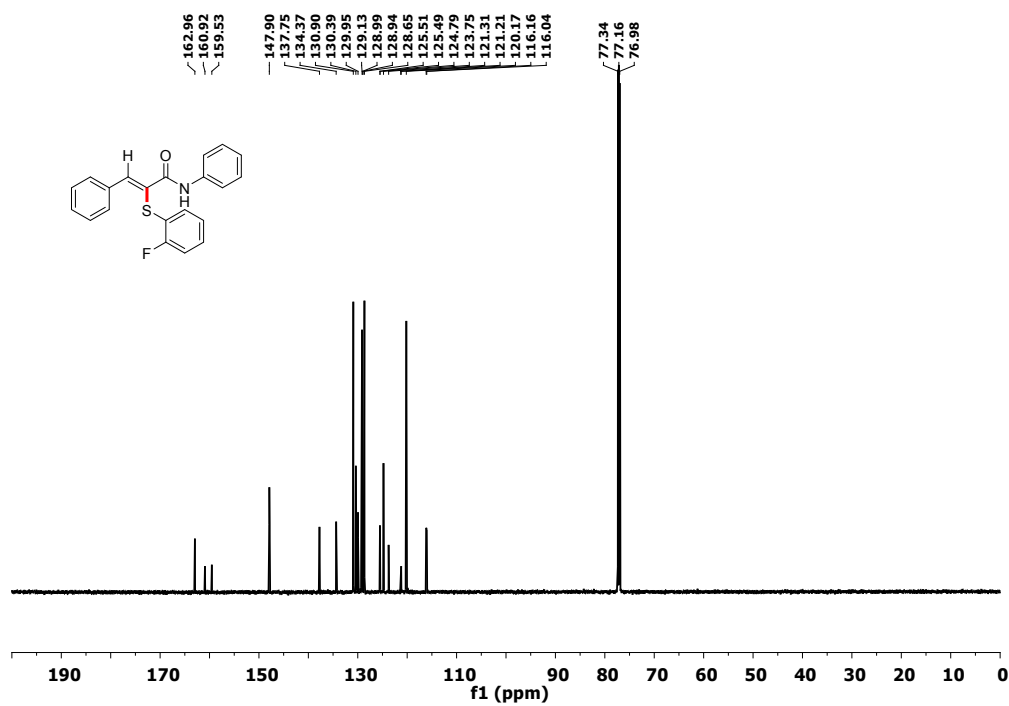

Fig. S34. <sup>13</sup>C NMR spectrum of (Z)-2-((2-fluorophenyl)thio)-N,3-diphenylacrylamide (3aj)

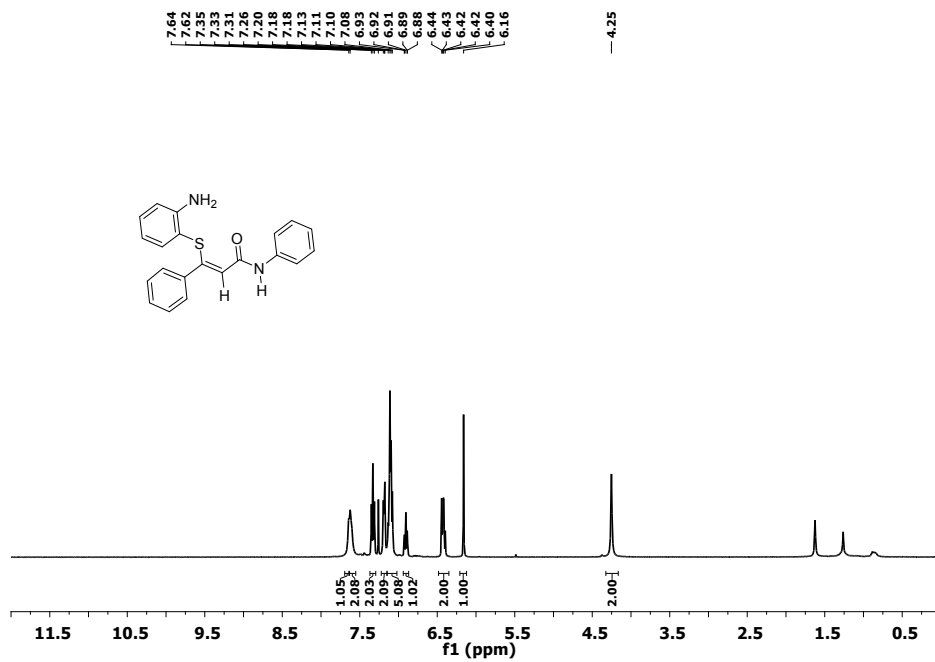

Fig. S35. <sup>1</sup>H NMR spectrum of (Z)-3-((2-aminophenyl)thio)-N,3-diphenylacrylamide (**3ak**)

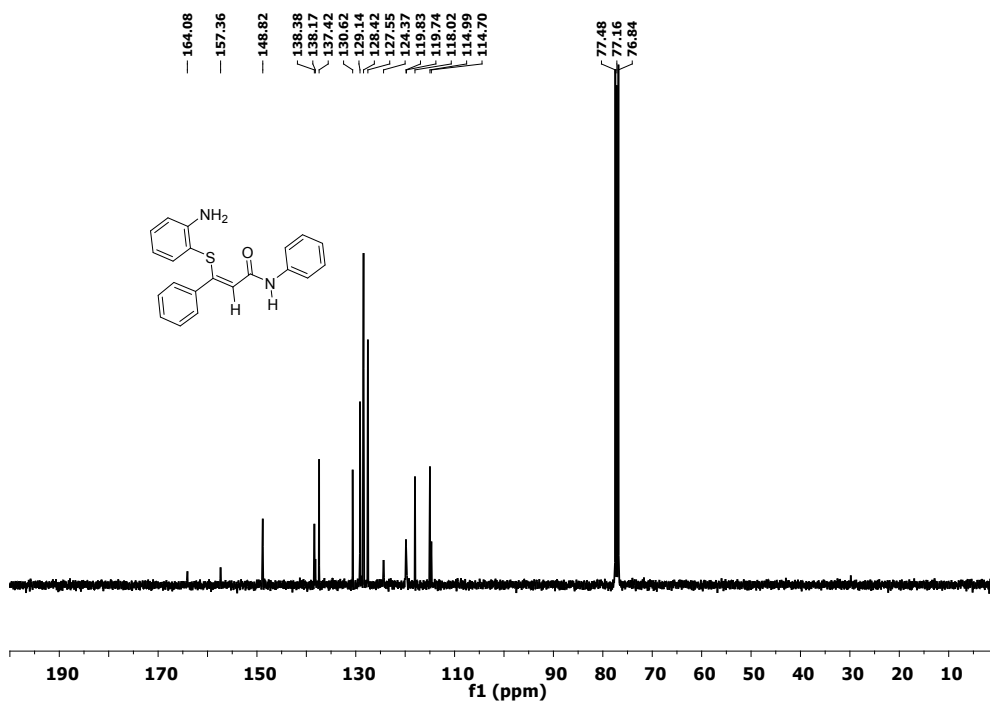

Fig. S36. <sup>13</sup>C NMR spectrum of (Z)-2-((2-aminophenyl)thio)-N,3-diphenylacrylamide (**3ak**)

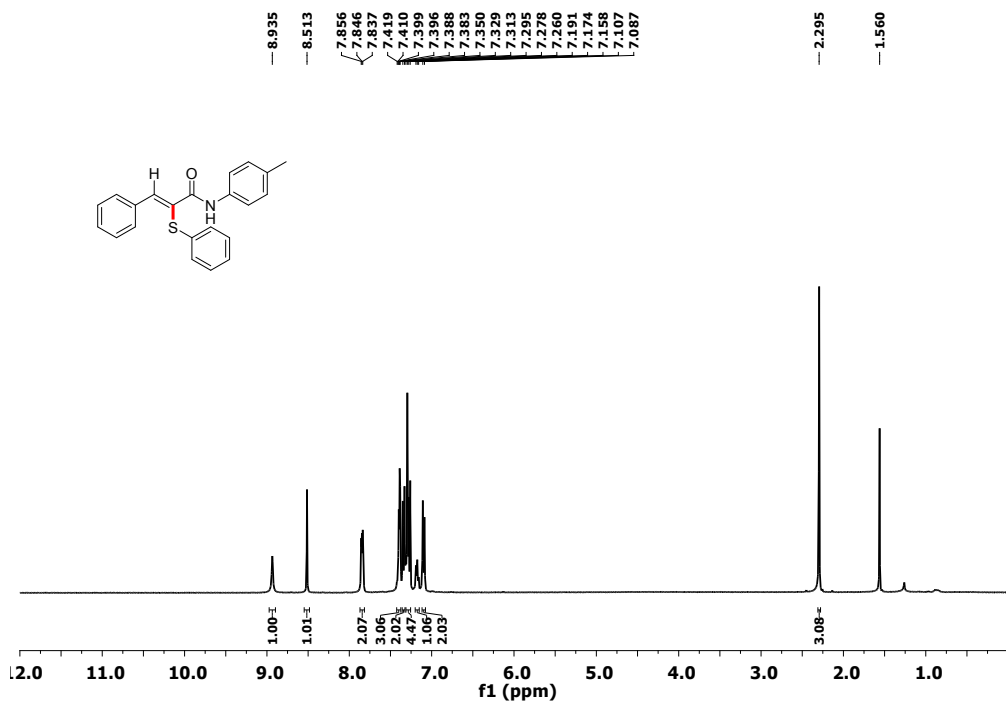

Fig. S37. <sup>1</sup>H NMR spectrum of (Z)-3-phenyl-2-(phenylthio)-N-(p-tolyl)acrylamide (**3ba**)

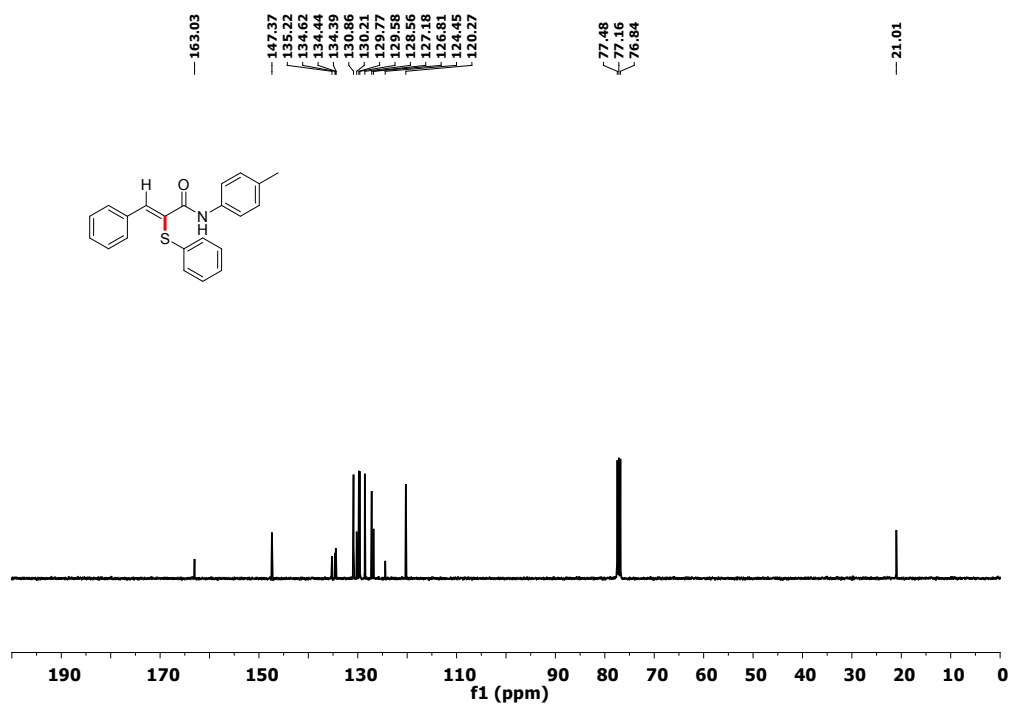

Fig. S38. <sup>13</sup>C NMR spectrum of (Z)-3-phenyl-2-(phenylthio)-N-(p-tolyl)acrylamide (**3ba**)

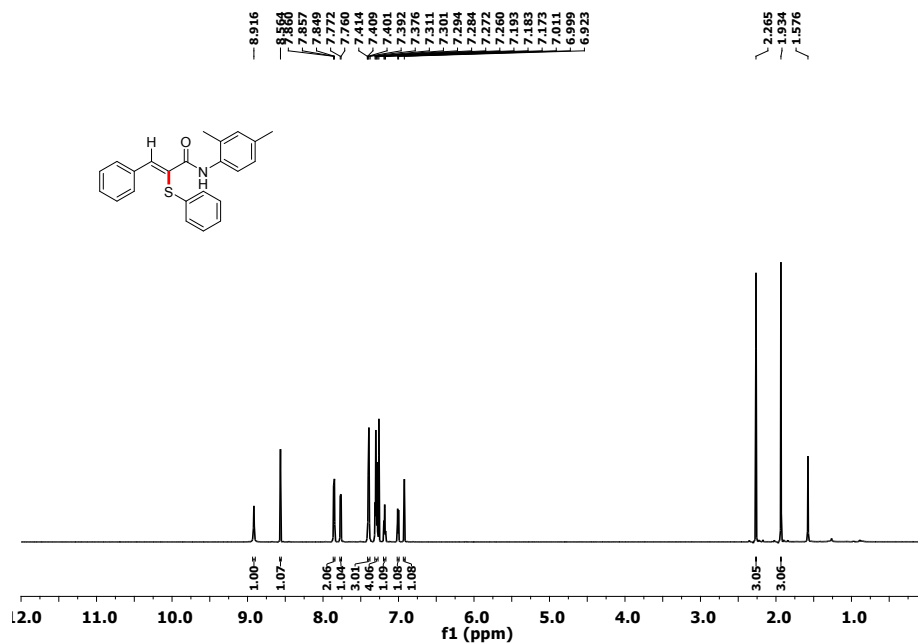

**Fig. S39.** <sup>1</sup>H NMR spectrum of (Z)-N-(2,4-dimethylphenyl)-3-phenyl-2-(phenylthio)acrylamide (**3ca**)

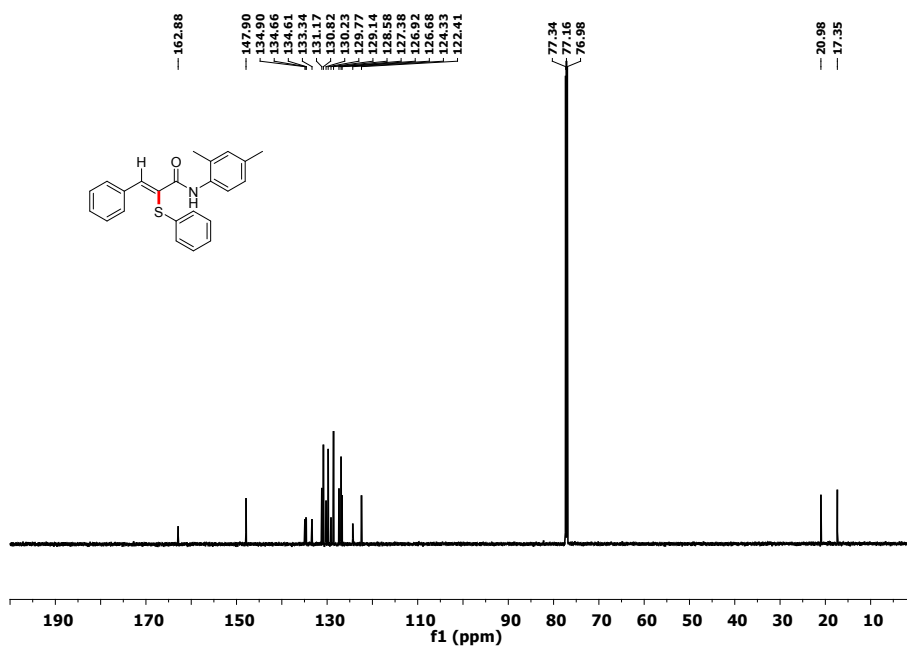

**Fig. S40.** <sup>13</sup>C NMR spectrum of (Z)-N-(2,4-dimethylphenyl)-3-phenyl-2-(phenylthio)acrylamide (**3ca**)



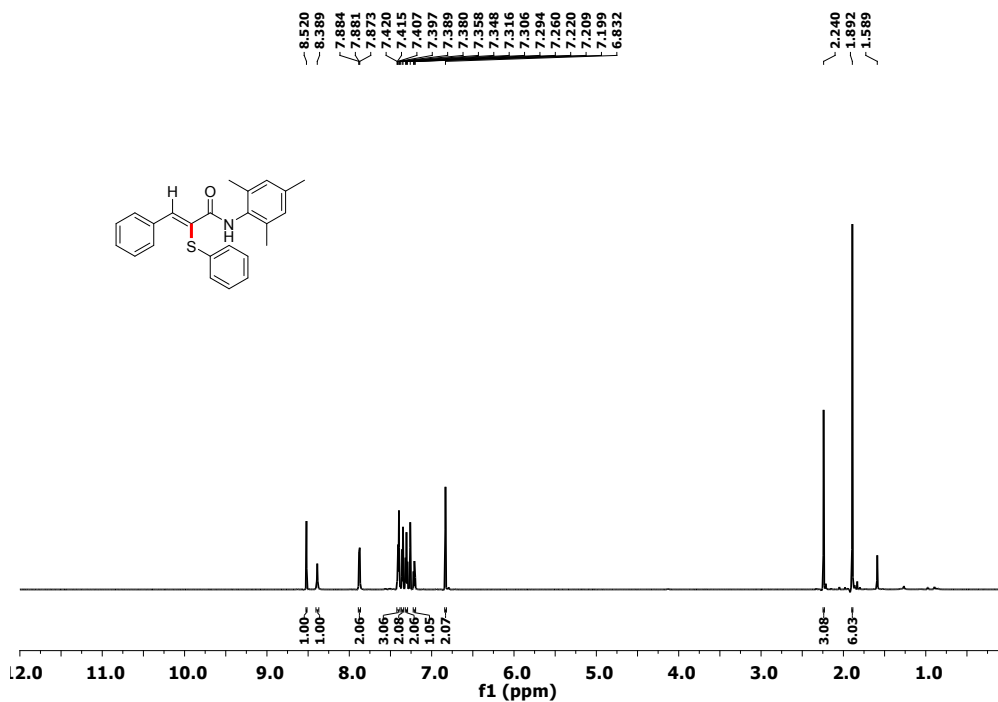

Fig. S41. <sup>1</sup>H NMR spectrum of (Z)-N-mesityl-3-phenyl-2-(phenylthio)acrylamide (3da)

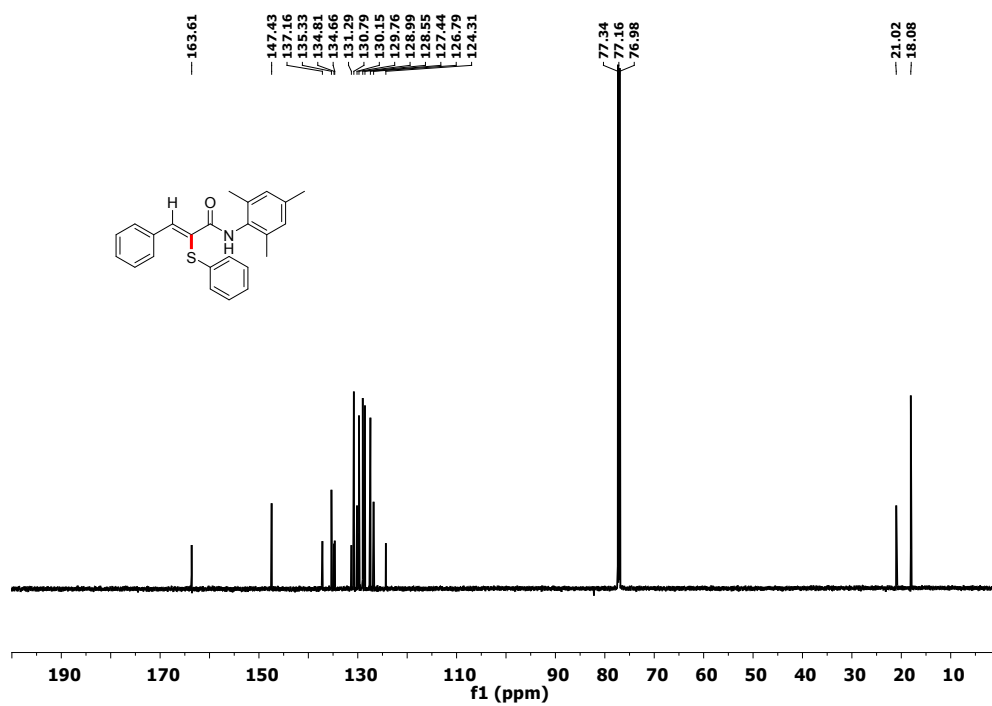

Fig. S42. <sup>13</sup>C NMR spectrum of (Z)-N-mesityl-3-phenyl-2-(phenylthio)acrylamide (3da)

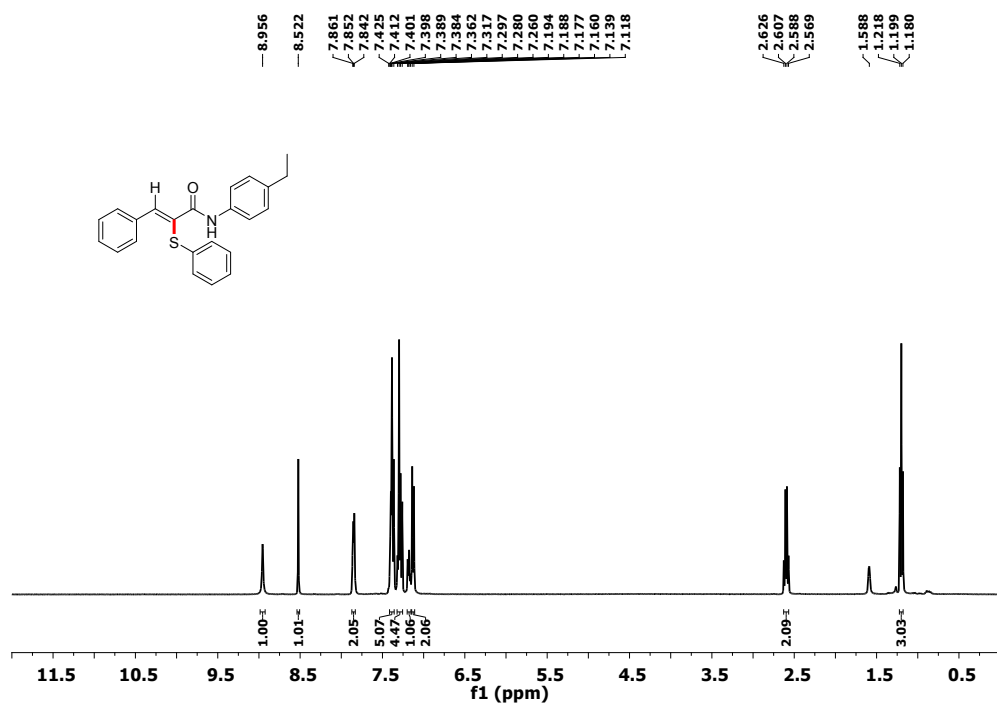

Fig. S43. <sup>1</sup>H NMR spectrum of (Z)-N-(4-ethylphenyl)-3-phenyl-2-(phenylthio)acrylamide (3ea)

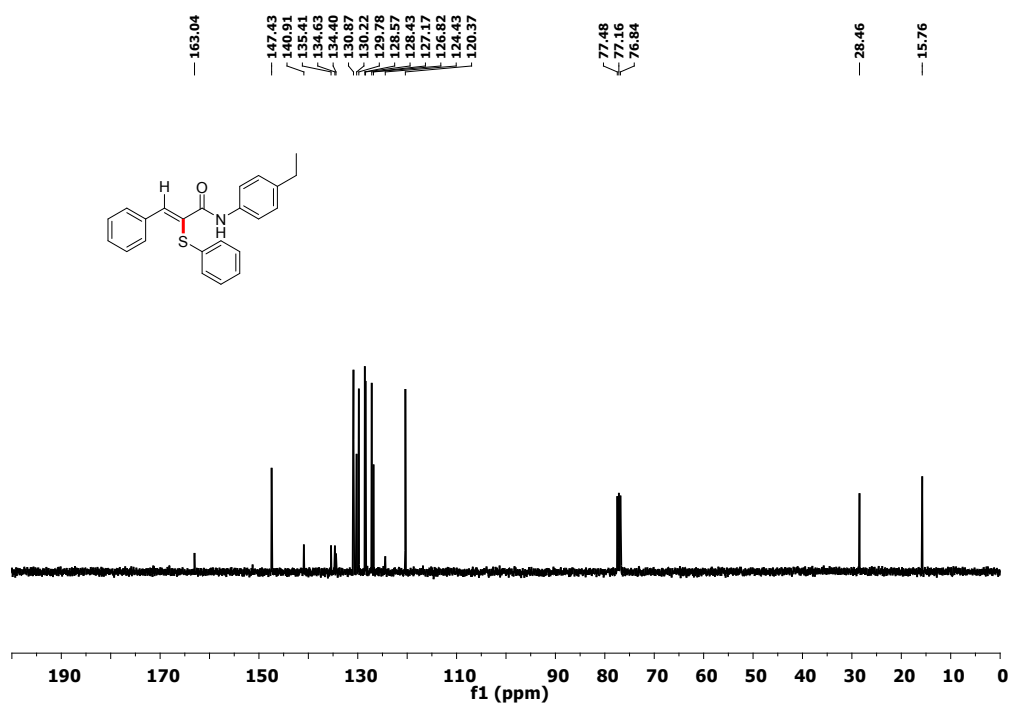

Fig. S44. <sup>13</sup>C NMR spectrum of (Z)-N-(4-ethylphenyl)-3-phenyl-2-(phenylthio)acrylamide (3ea)

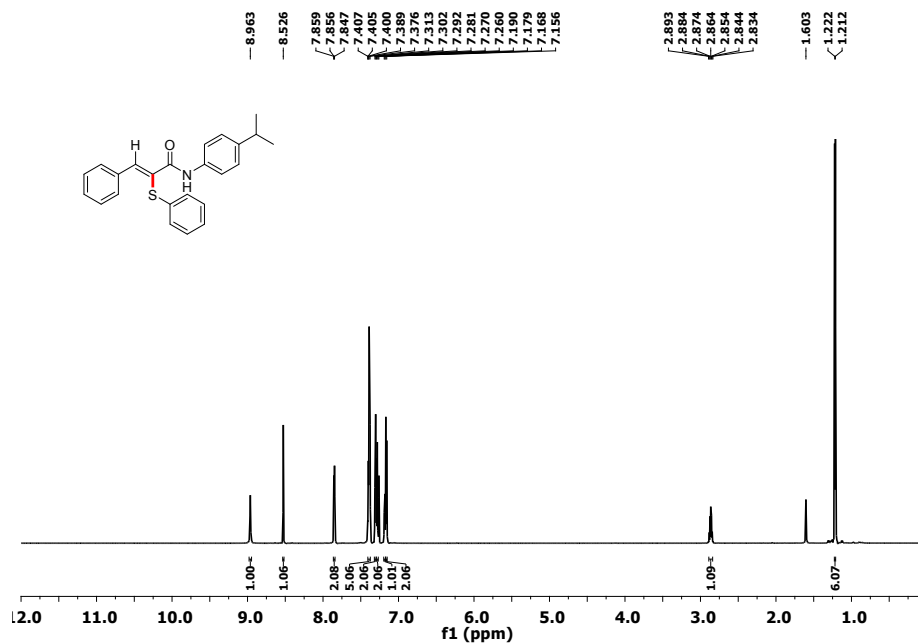

**Fig. S45.** <sup>1</sup>H NMR spectrum of (Z)-N-(4-isopropylphenyl)-3-phenyl-2-(phenylthio)acrylamide (**3fa**)

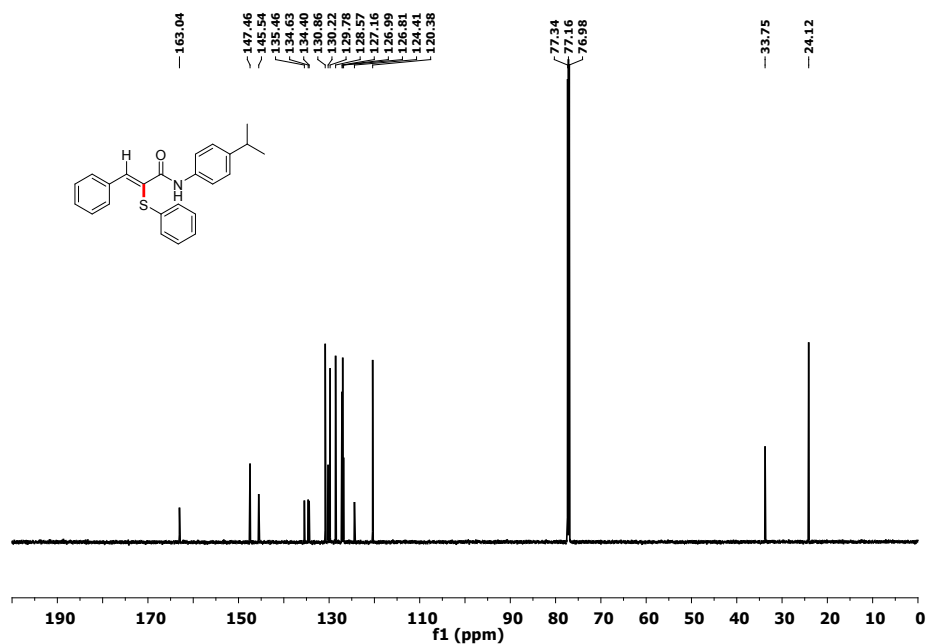

**Fig. S46.** <sup>13</sup>C NMR spectrum of (Z)-N-(4-isopropylphenyl)-3-phenyl-2-(phenylthio)acrylamide (**3fa**)

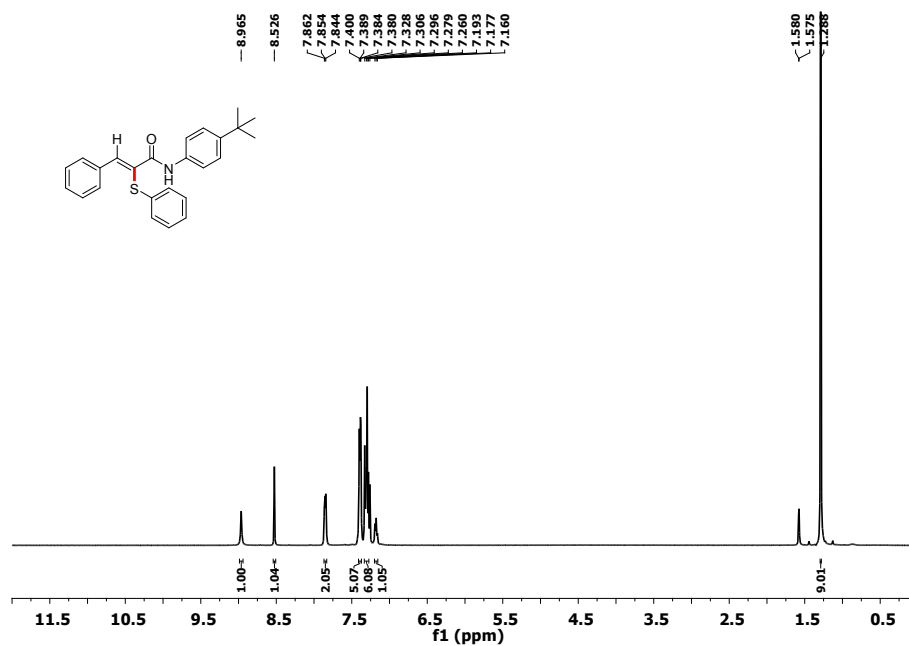

Fig. S47. <sup>1</sup>H NMR spectrum of (Z)-N-(4-(tert-butyl)phenyl)-3-phenyl-2-(phenylthio)acrylamide (**3ga**)

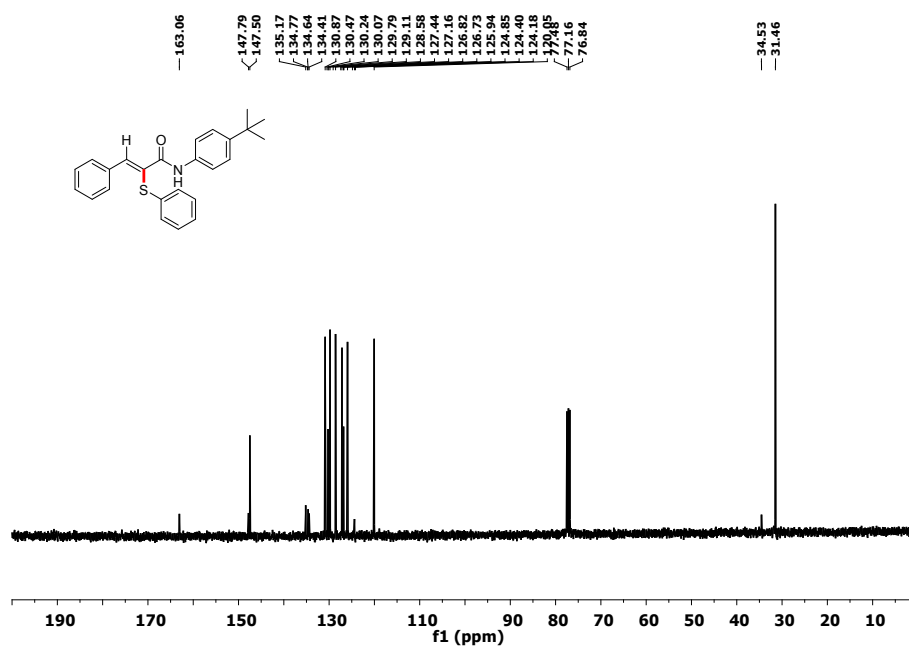

Fig. S48. <sup>13</sup>C NMR spectrum of (Z)-N-(4-(tert-butyl)phenyl)-3-phenyl-2-(phenylthio)acrylamide (**3ga**)

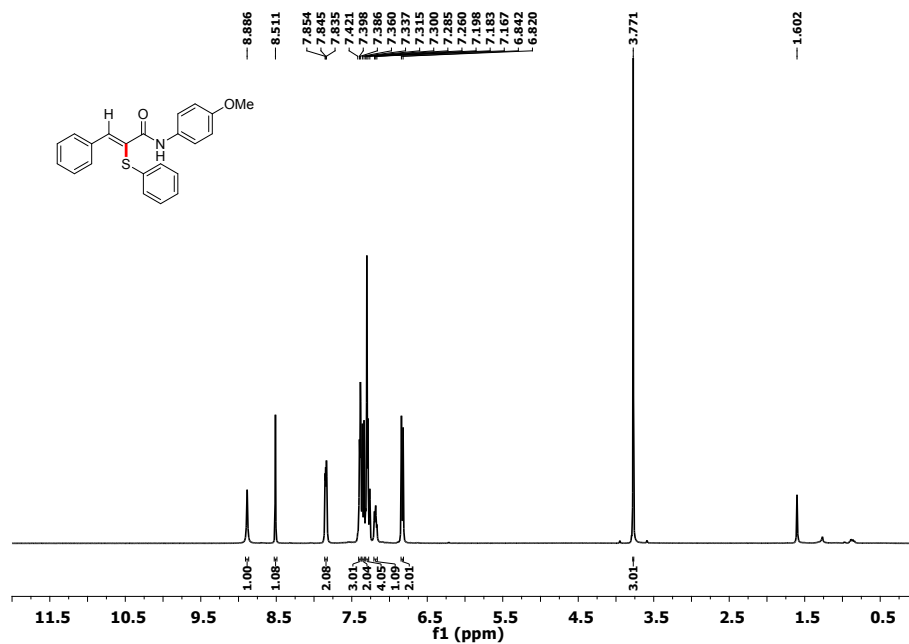

**Fig. S49.** <sup>1</sup>H NMR spectrum of (Z)-N-(4-methoxyphenyl)-3-phenyl-2-(phenylthio)acrylamide (3ha)

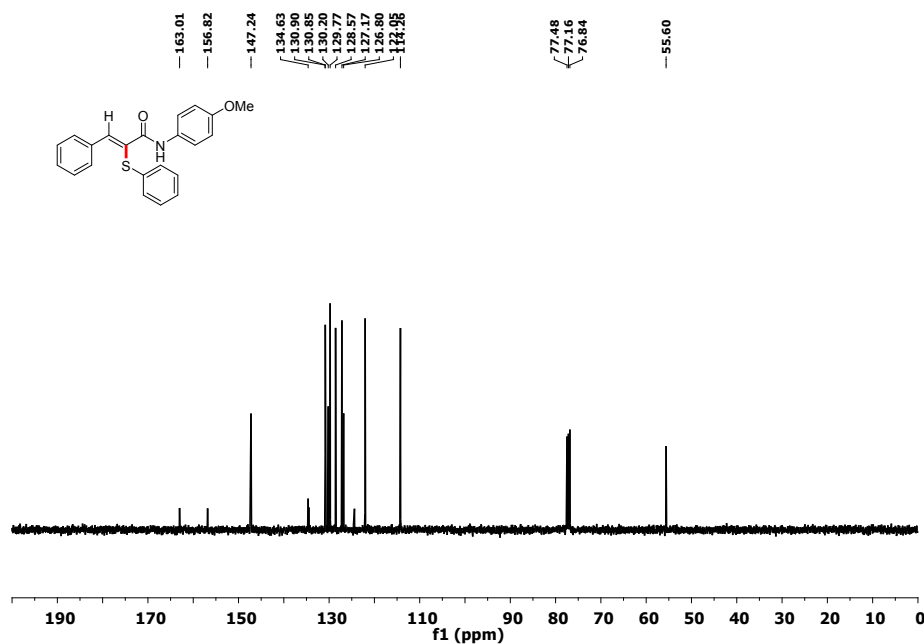

**Fig. S50.** <sup>13</sup>C NMR spectrum of (Z)-N-(4-methoxyphenyl)-3-phenyl-2-(phenylthio)acrylamide (3ha)

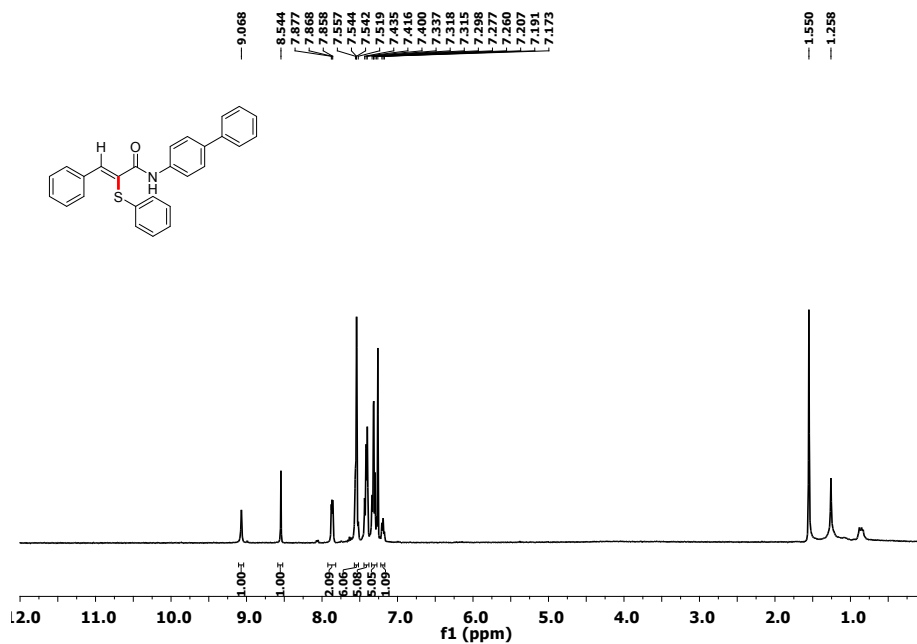

**Fig. S51.** <sup>1</sup>H NMR spectrum of (Z)-N-([1,1'-biphenyl]-4-yl)-3-phenyl-2-(phenylthio)acrylamide (**3ia**)

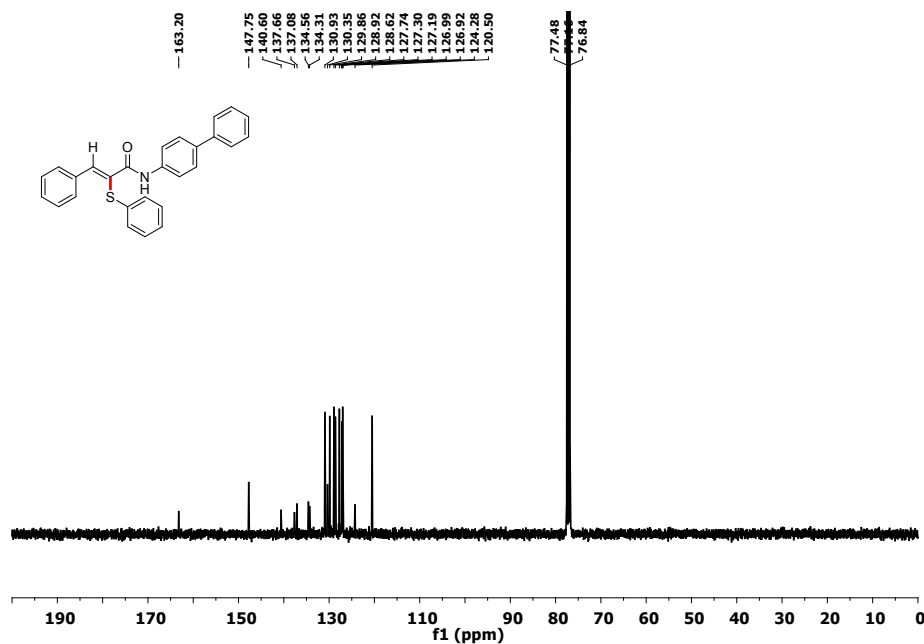

**Fig. S52.** <sup>13</sup>C NMR spectrum of (Z)-N-([1,1'-biphenyl]-4-yl)-3-phenyl-2-(phenylthio)acrylamide (**3ia**)

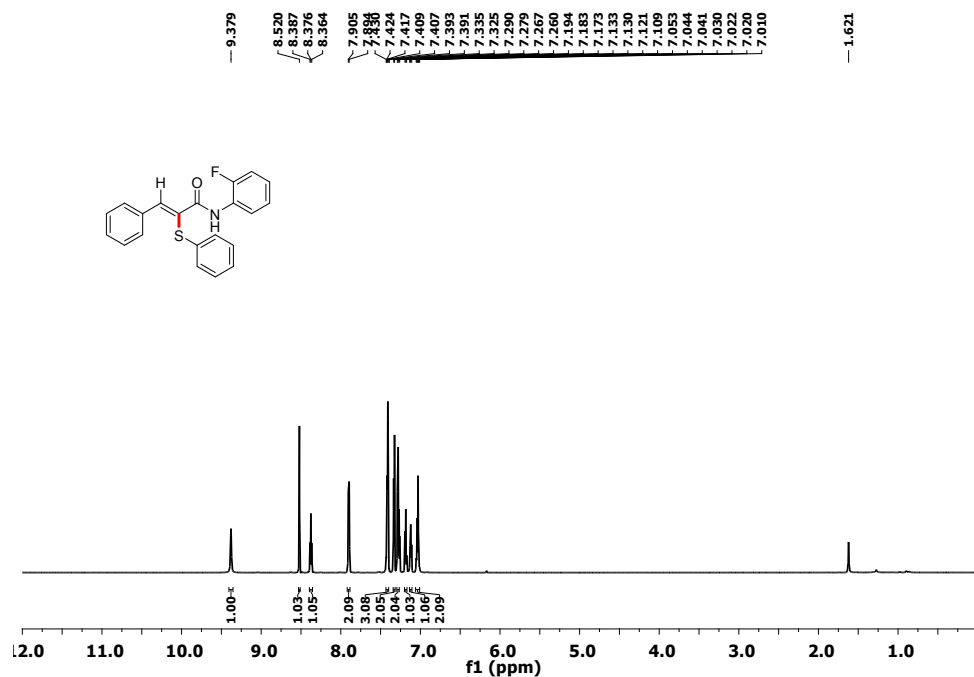

**Fig. S53.** <sup>1</sup>H NMR spectrum of (Z)-N-(2-fluorophenyl)-3-phenyl-2-(phenylthio)acrylamide (3ja)

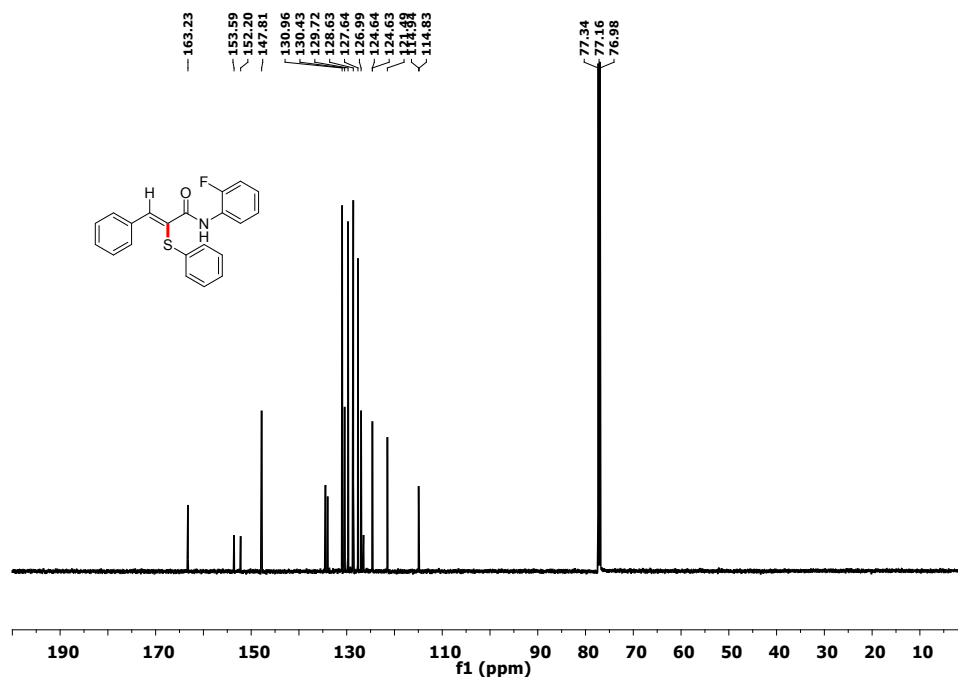

**Fig. S54.** <sup>13</sup>C NMR spectrum of (Z)-N-(2-fluorophenyl)-3-phenyl-2-(phenylthio)acrylamide (3ja)

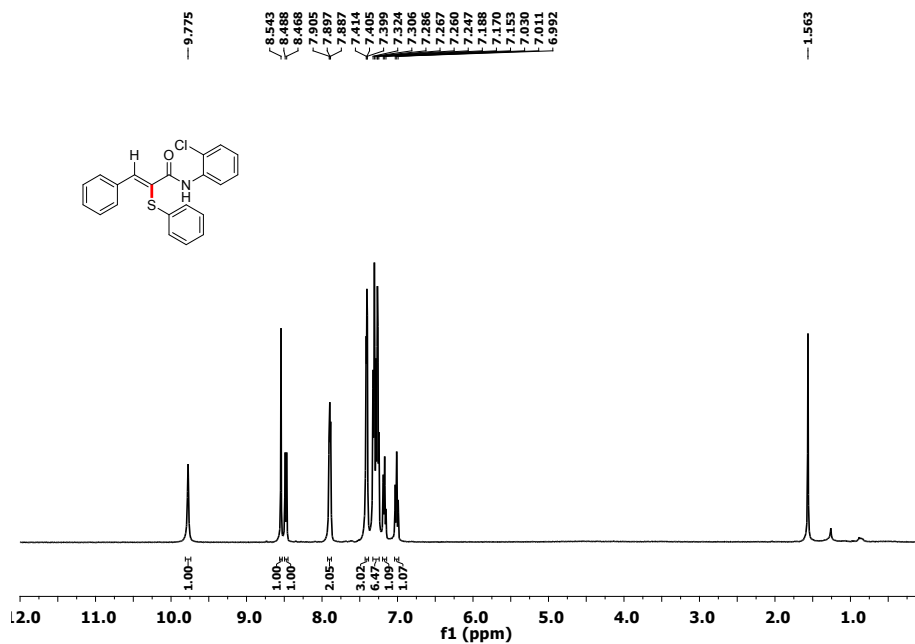

Fig. S55. <sup>1</sup>H NMR spectrum of (Z)-N-(2-chlorophenyl)-3-phenyl-2-(phenylthio)acrylamide (3ka)

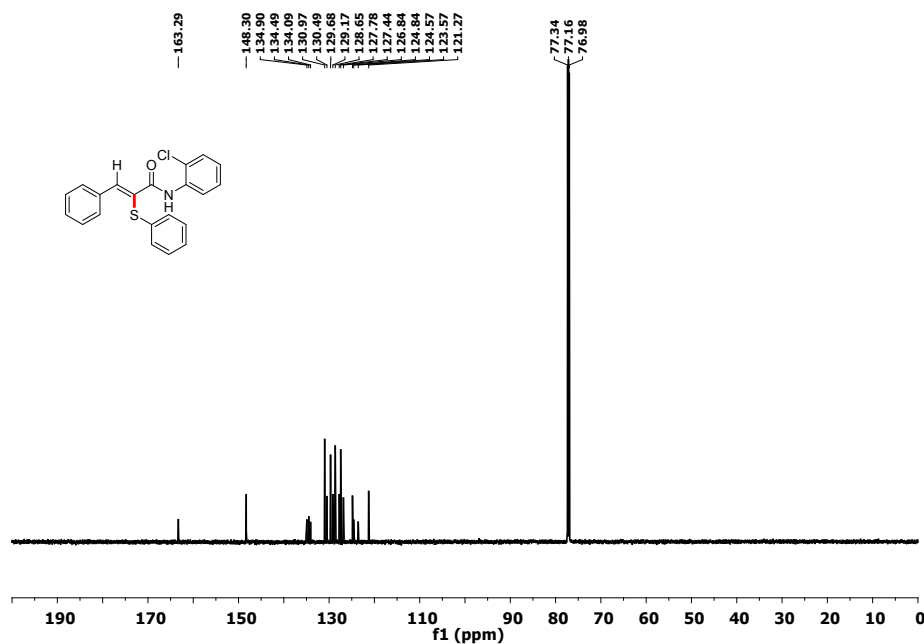

Fig. S56. <sup>13</sup>C NMR spectrum of (Z)-N-(2-chlorophenyl)-3-phenyl-2-(phenylthio)acrylamide (3ka)



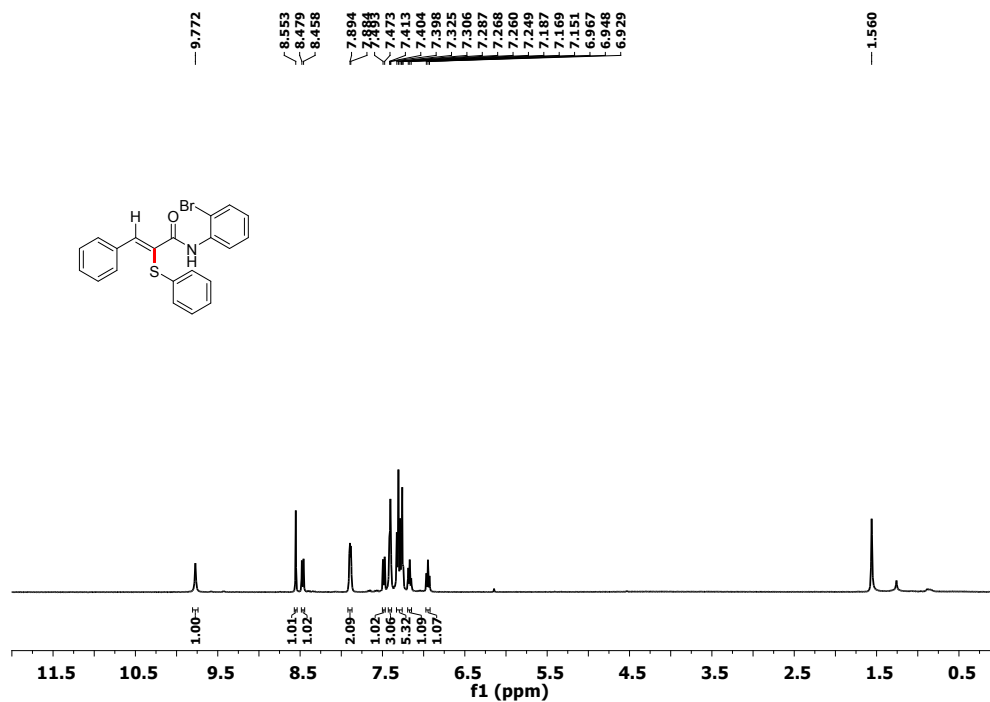

**Fig. S57.** <sup>1</sup>H NMR spectrum of (Z)-N-(2-bromophenyl)-3-phenyl-2-(phenylthio)acrylamide (3la)

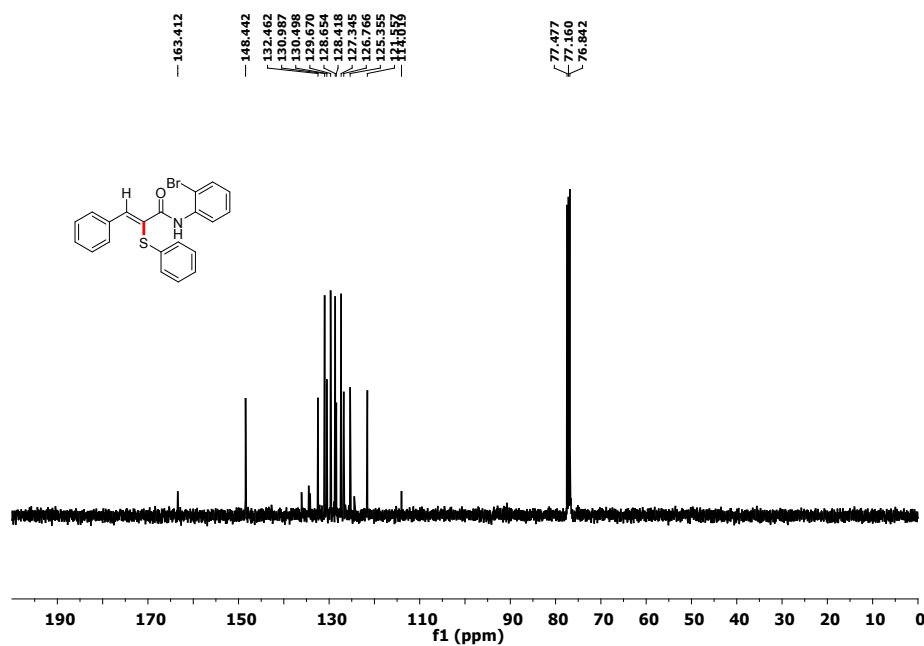

**Fig. S58.** <sup>13</sup>C NMR spectrum of (Z)-N-(2-bromophenyl)-3-phenyl-2-(phenylthio)acrylamide (3la)

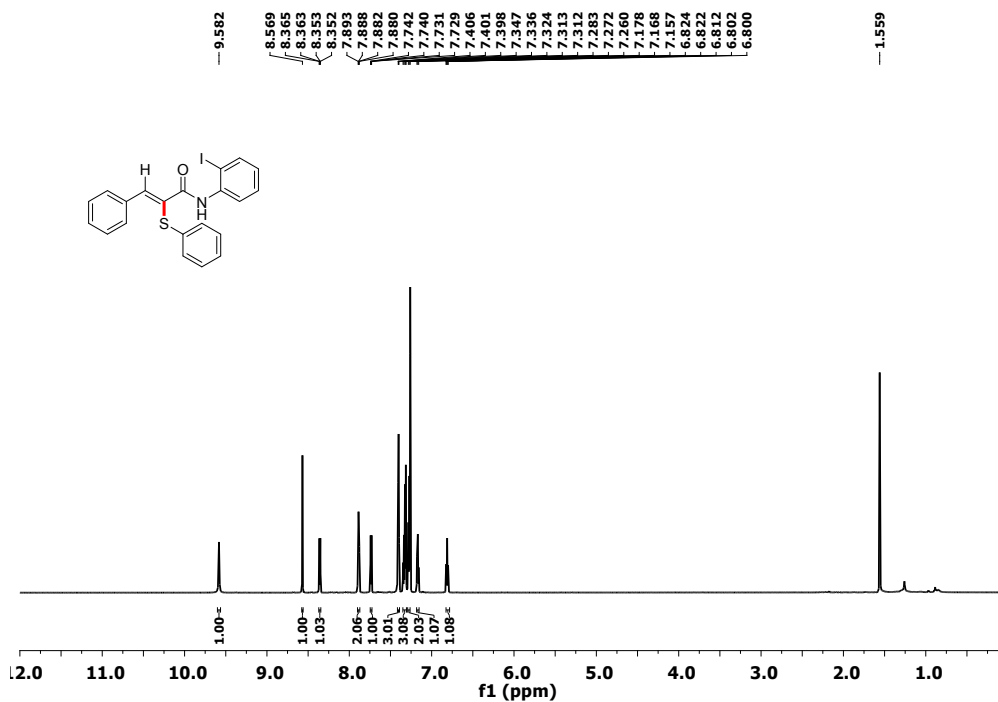

Fig. S59. <sup>1</sup>H NMR spectrum of (Z)-N-(2-iodophenyl)-3-phenyl-2-(phenylthio)acrylamide (3ma)

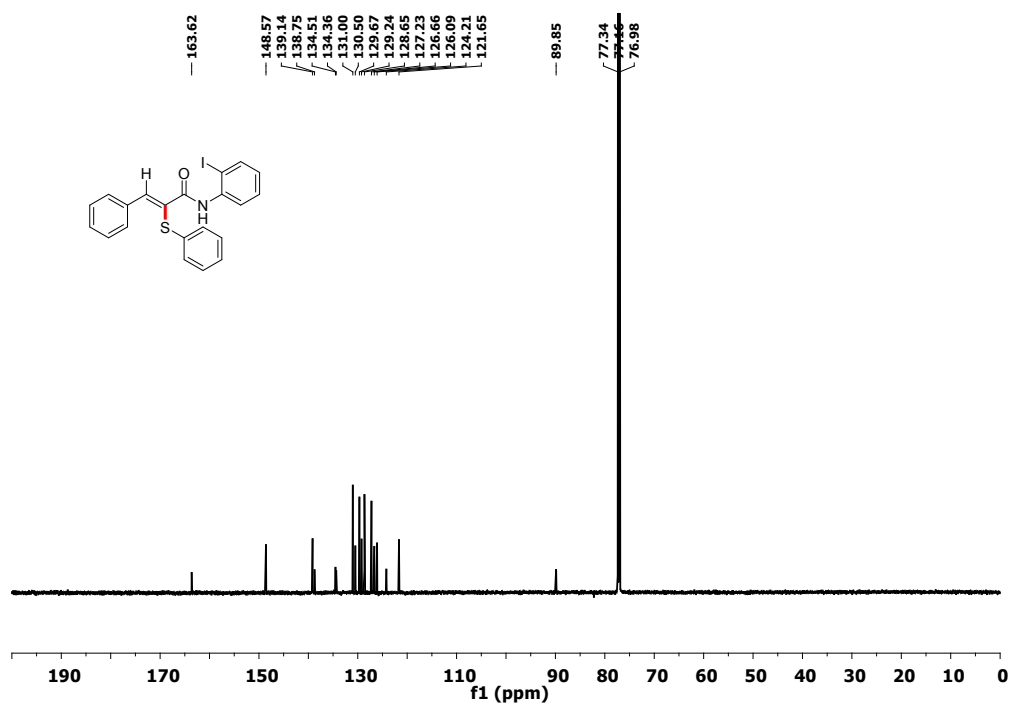

Fig. S60. <sup>13</sup>C NMR spectrum of (Z)-N-(2-iodophenyl)-3-phenyl-2-(phenylthio)acrylamide (3ma)

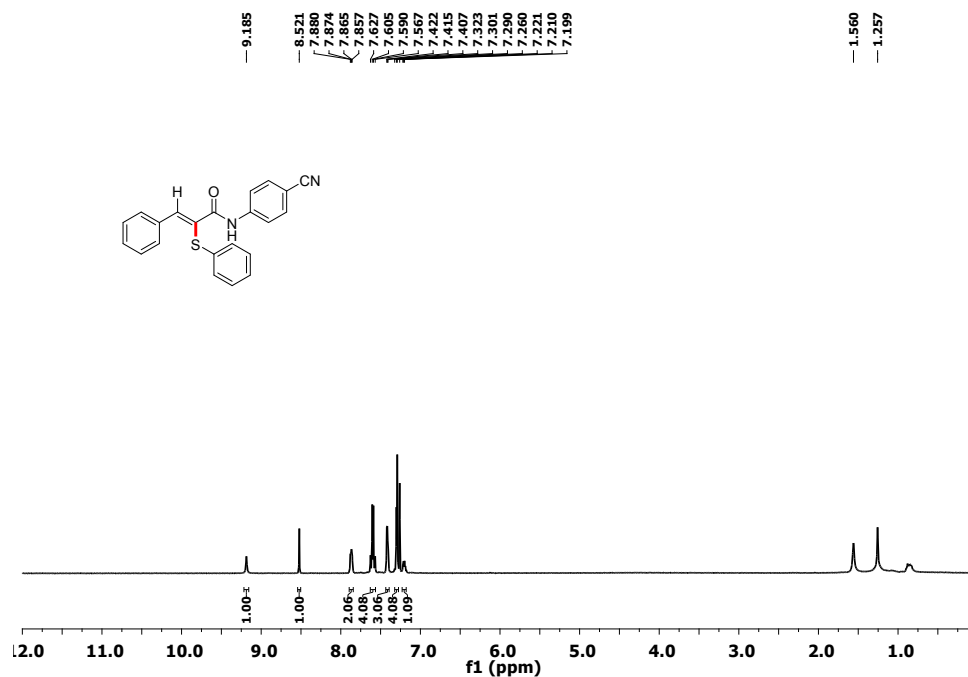

**Fig. S61.** <sup>1</sup>H NMR spectrum of (Z)-N-(4-cyanophenyl)-3-phenyl-2-(phenylthio)acrylamide (3na)

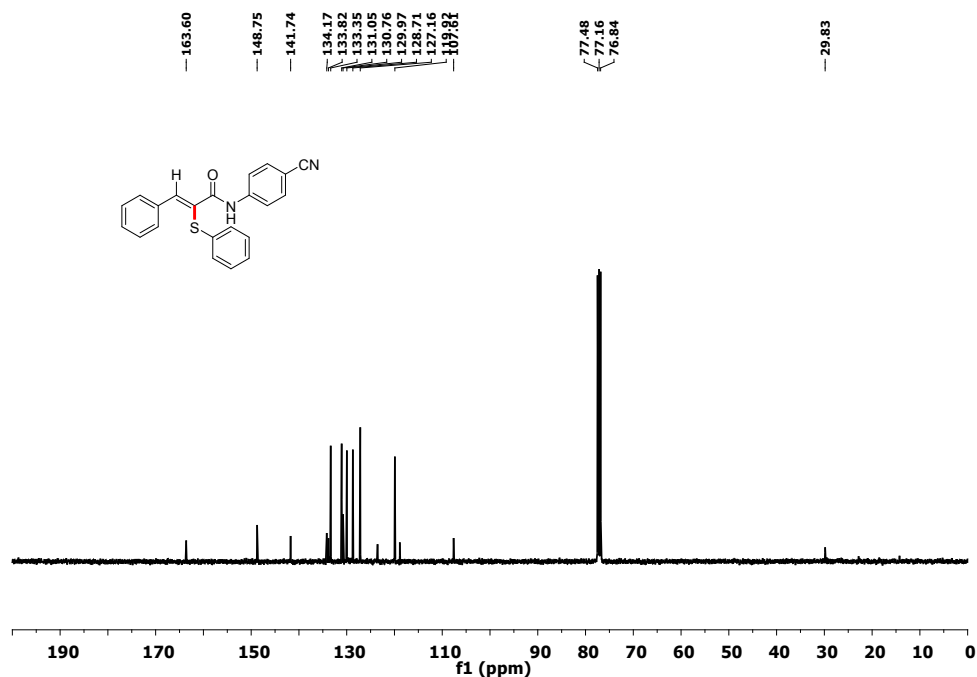

**Fig. S62.** <sup>13</sup>C NMR spectrum of (Z)-N-(4-cyanophenyl)-3-phenyl-2-(phenylthio)acrylamide (3na)

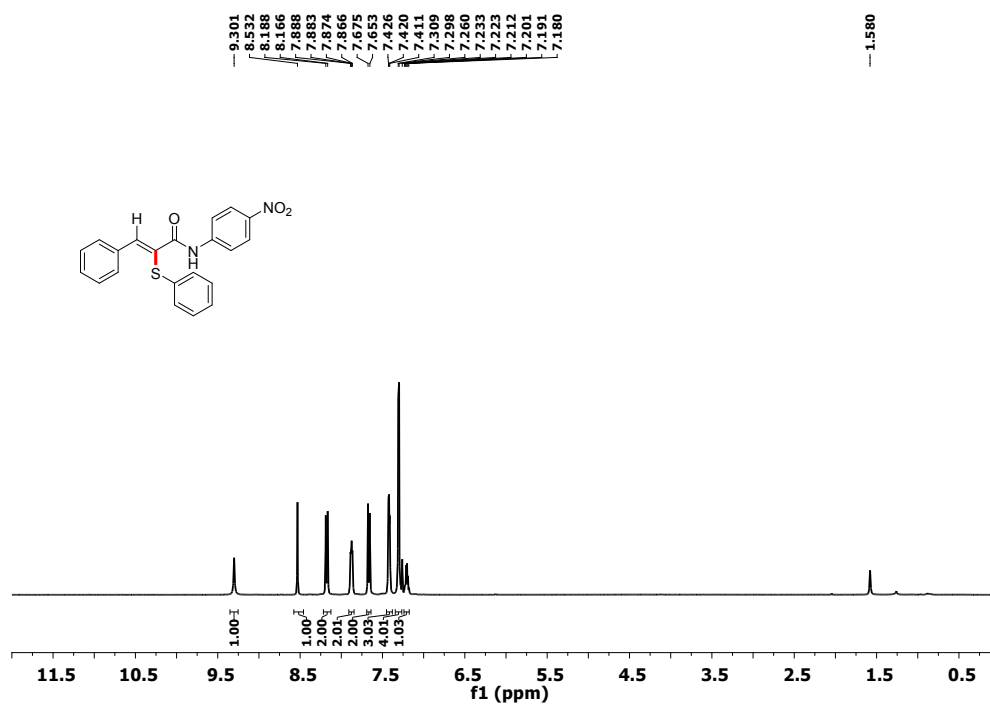

**Fig. S63.** <sup>1</sup>H NMR spectrum of (Z)-N-(4-nitrophenyl)-3-phenyl-2-(phenylthio)acrylamide (30a)

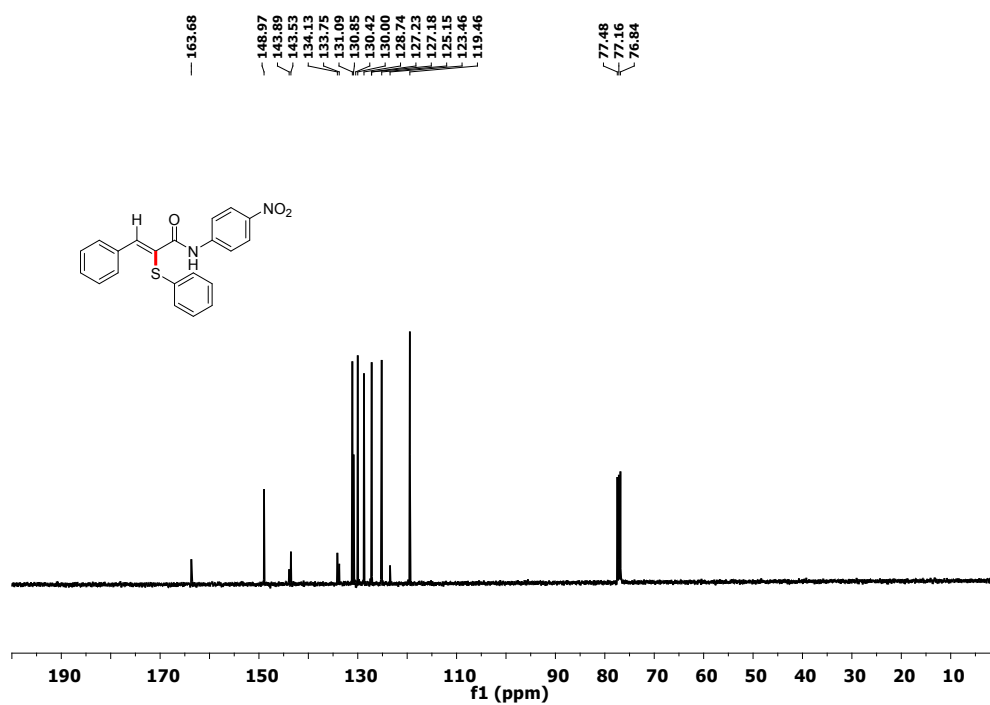

**Fig. S64.** <sup>13</sup>C NMR spectrum of (Z)-N-(4-nitrophenyl)-3-phenyl-2-(phenylthio)acrylamide (30a)

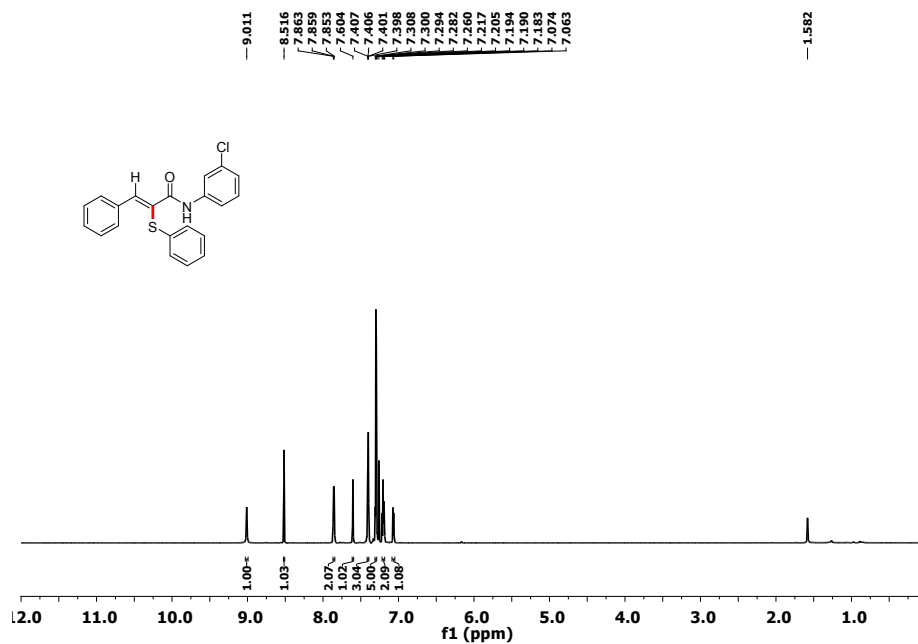

**Fig. S65.** <sup>1</sup>H NMR spectrum of (Z)-N-(3-chlorophenyl)-3-phenyl-2-(phenylthio)acrylamide (3pa)

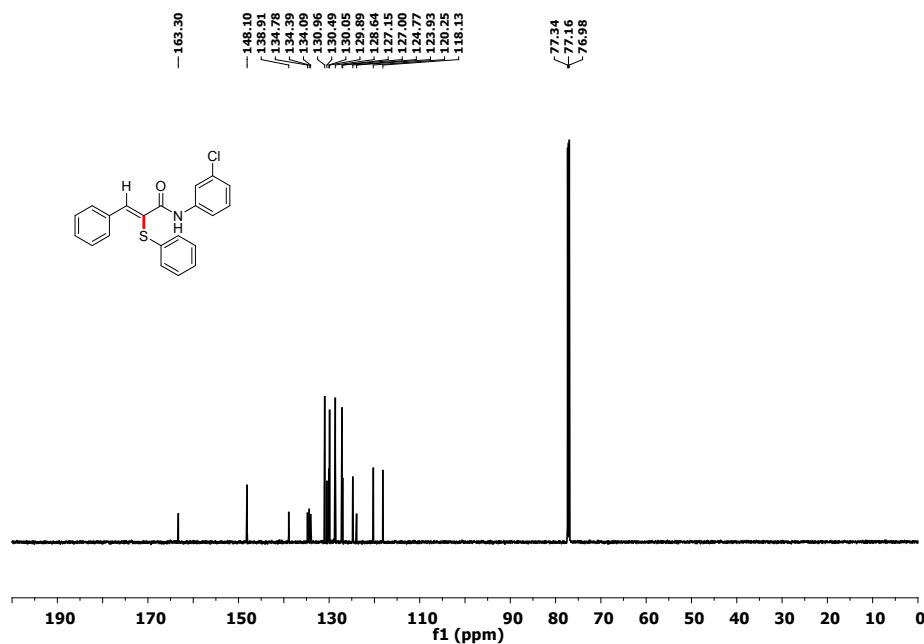

**Fig. S66.** <sup>13</sup>C NMR spectrum of (Z)-N-(3-chlorophenyl)-3-phenyl-2-(phenylthio)acrylamide (3pa)

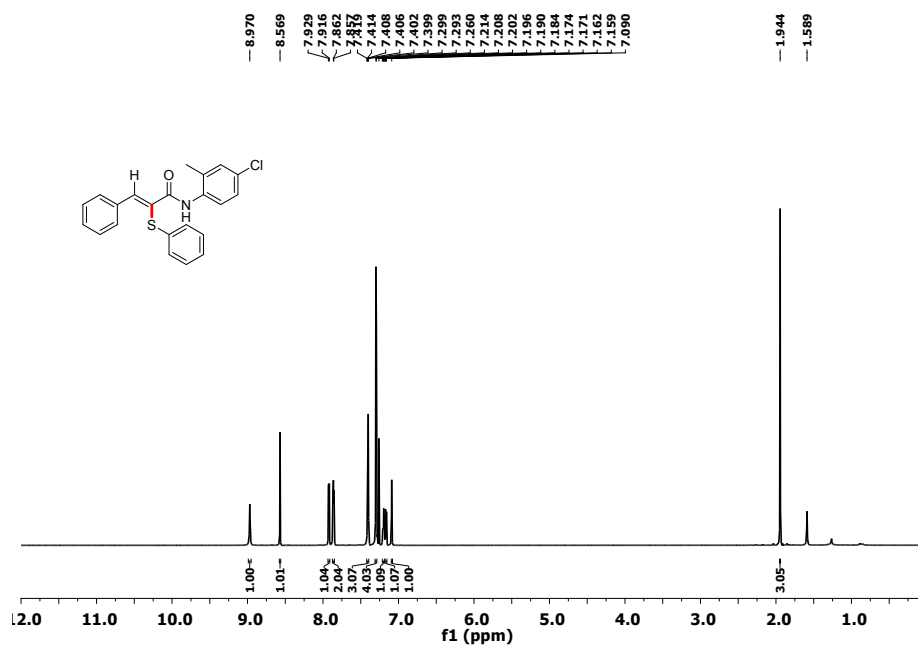

**Fig. S67.** <sup>1</sup>H NMR spectrum of (Z)-N-(4-chloro-2-methylphenyl)-3-phenyl-2-(phenylthio)acrylamide (**3qa**)

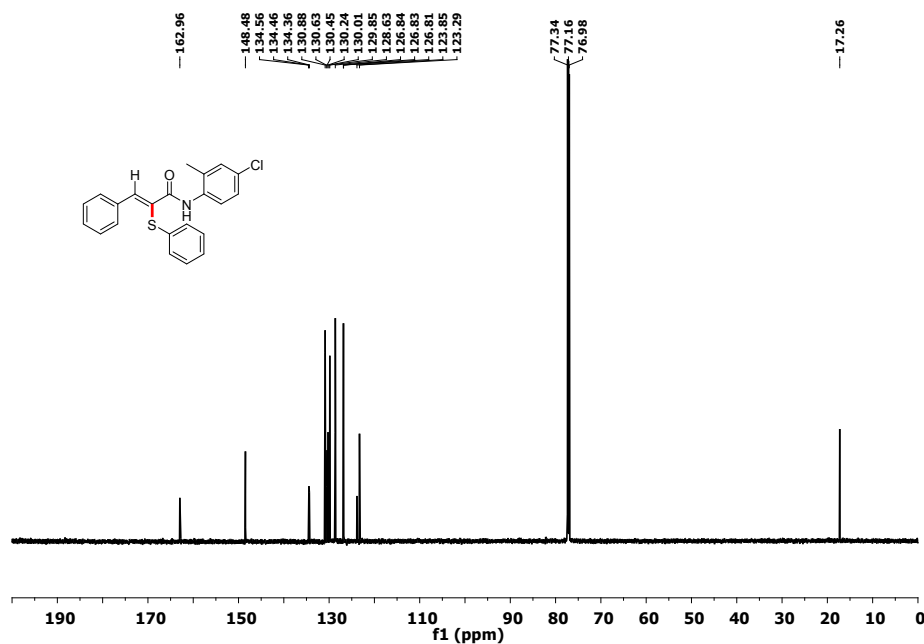

**Fig. S68.** <sup>13</sup>C NMR spectrum of (Z)-N-(4-chloro-2-methylphenyl)-3-phenyl-2-(phenylthio)acrylamide (**3qa**)

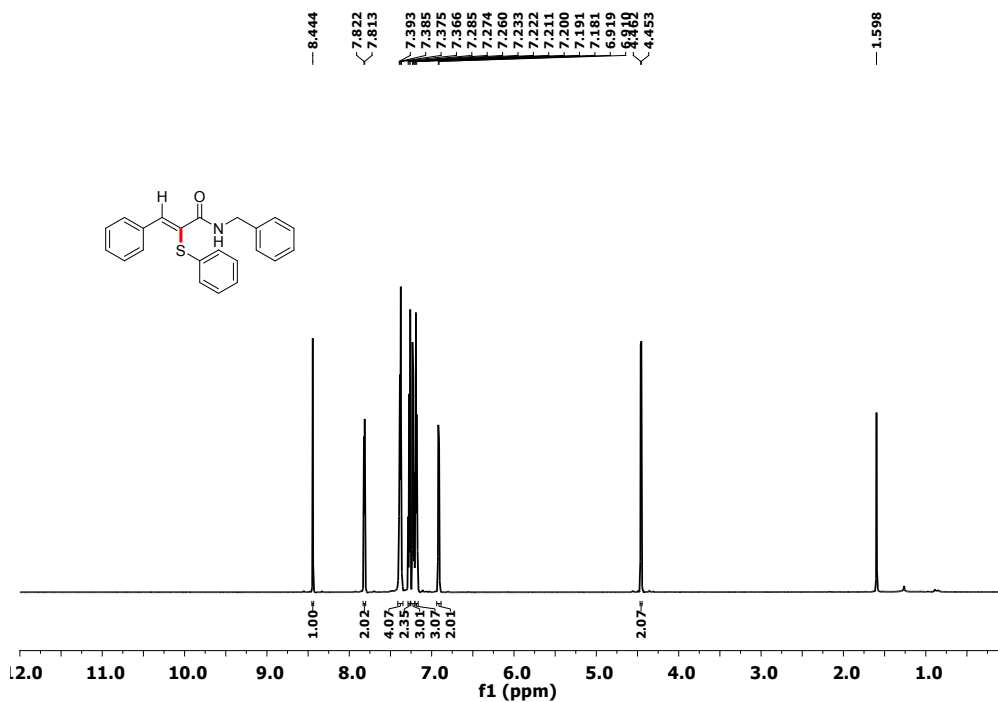

Fig. S69. <sup>1</sup>H NMR spectrum of ((Z)-N-benzyl-3-phenyl-2-(phenylthio)acrylamide (**3ra**)

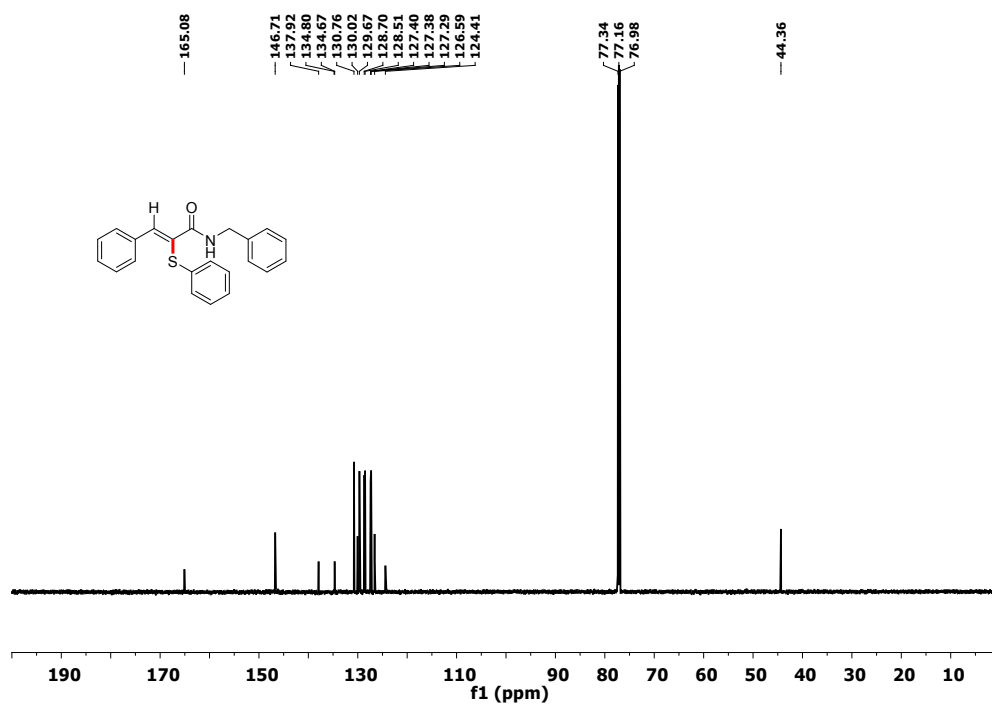

Fig. S70. <sup>13</sup>C NMR spectrum of ((Z)-N-benzyl-3-phenyl-2-(phenylthio)acrylamide (**3ra**)

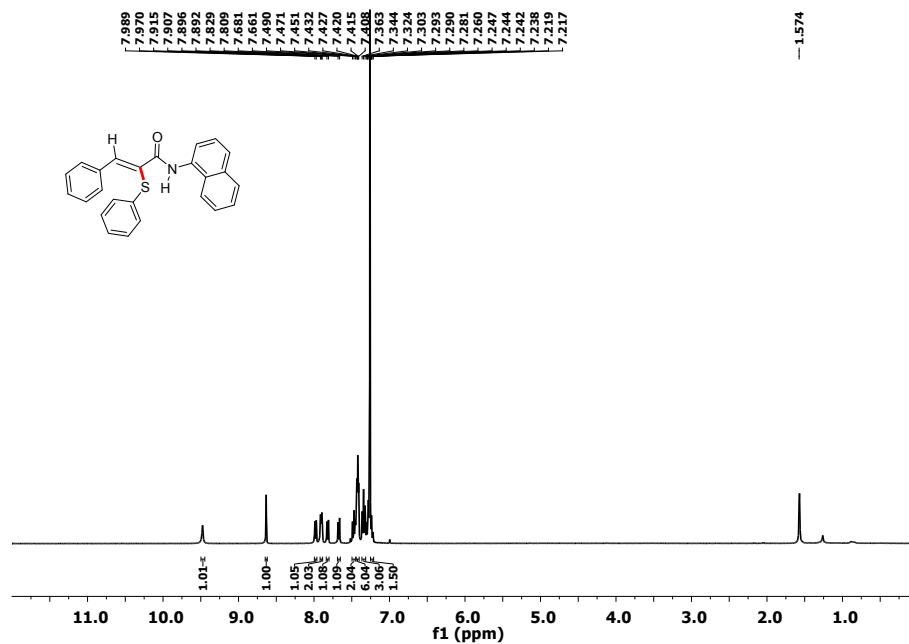

**Fig. S71.** <sup>1</sup>H NMR spectrum of (Z)-N-(naphthalen-1-yl)-3-phenyl-2-(phenylthio)acrylamide (3sa)

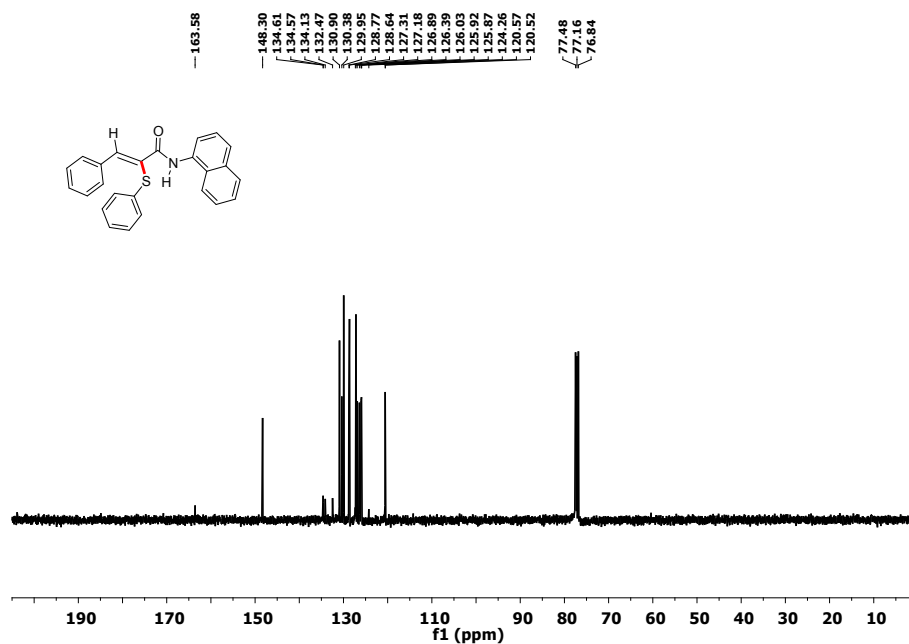

**Fig. S72.** <sup>13</sup>C NMR spectrum of (Z)-N-(naphthalen-1-yl)-3-phenyl-2-(phenylthio)acrylamide (3sa)



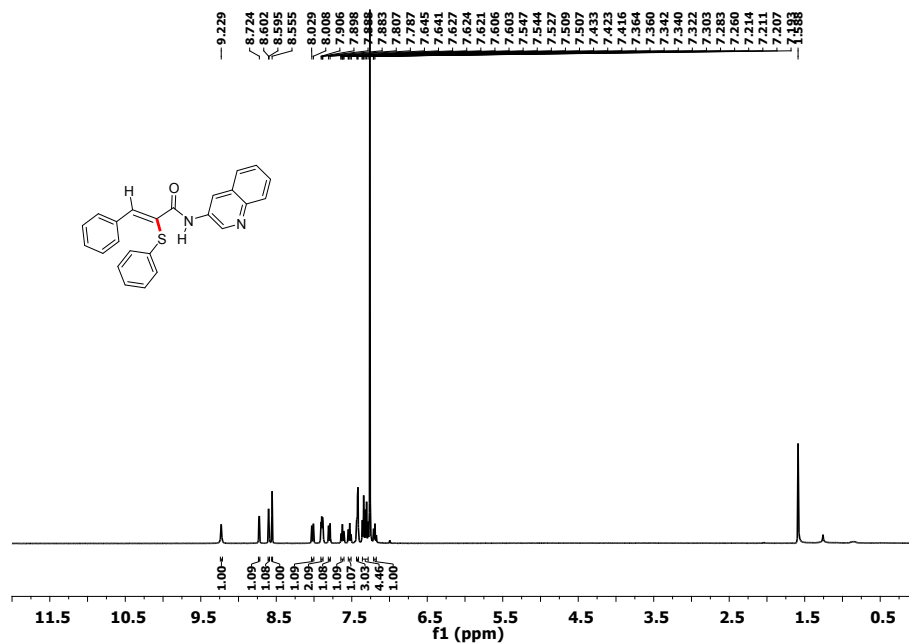

Fig. S73.  $^1\text{H}$  NMR spectrum of (Z)-3-phenyl-2-(phenylthio)-N-(quinolin-3-yl)acrylamide (3ta)

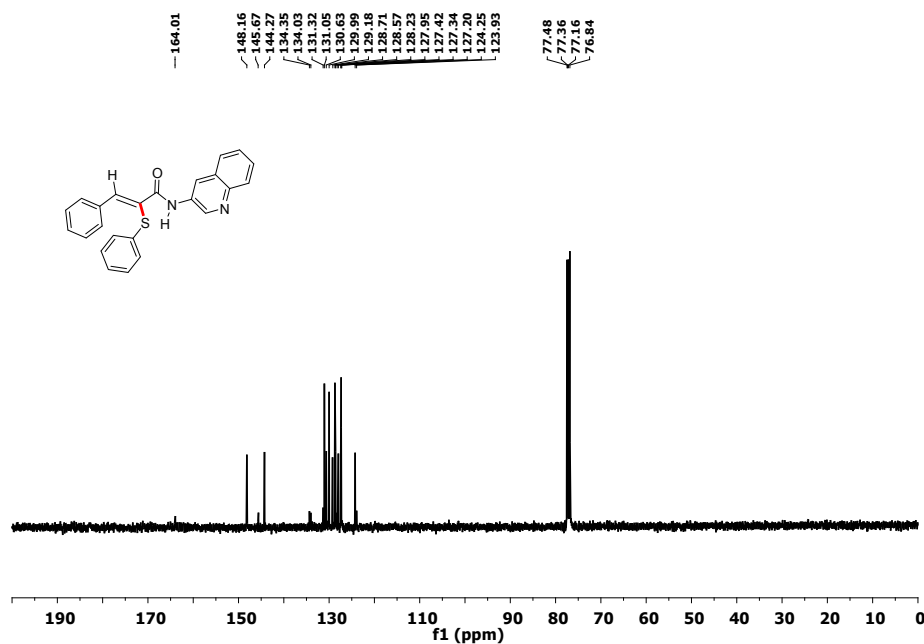

Fig. S74.  $^{13}\text{C}$  NMR spectrum of (Z)-3-phenyl-2-(phenylthio)-N-(quinolin-3-yl)acrylamide (3ta)

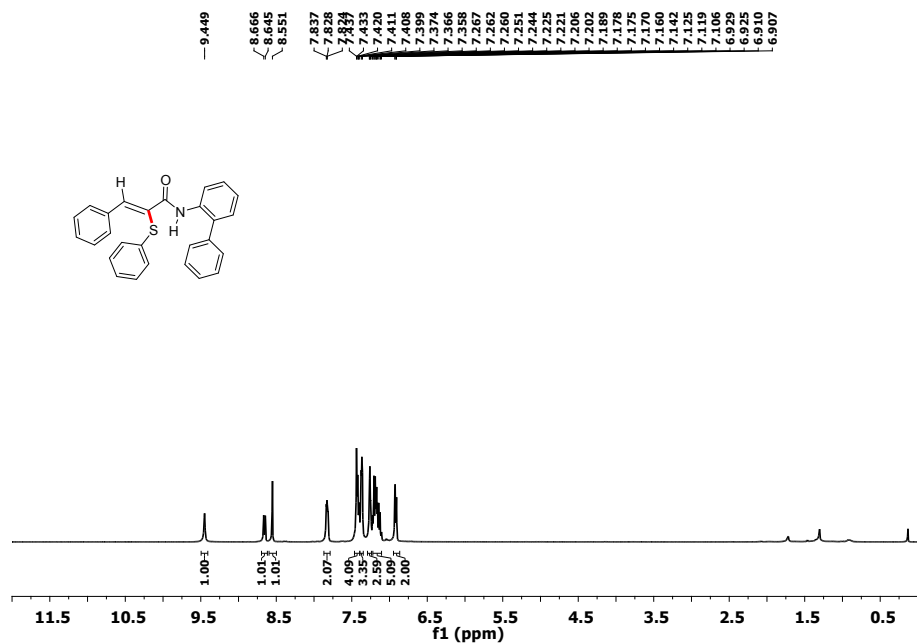

**Fig. S75.** <sup>1</sup>H NMR spectrum of (Z)-N-([1,1'-biphenyl]-2-yl)-3-phenyl-2-(phenylthio)acrylamide (3ua)

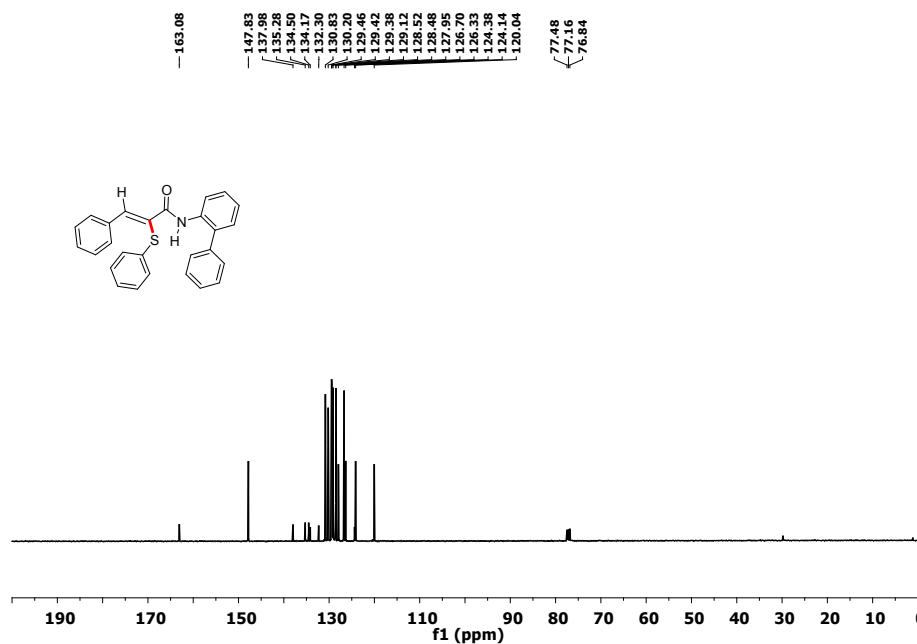

**Fig. S76.** <sup>13</sup>C NMR spectrum of (Z)-N-([1,1'-biphenyl]-2-yl)-3-phenyl-2-(phenylthio)acrylamide (3ua)

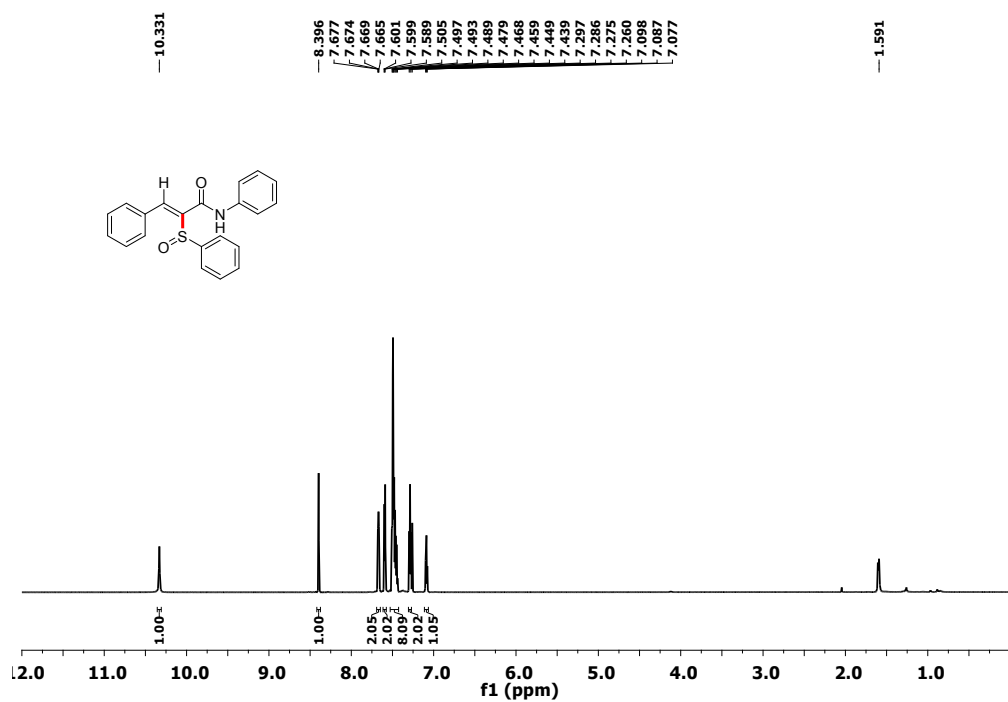

Fig.S77. <sup>1</sup>H NMR spectrum of (R,Z)-N,3-diphenyl-2-(phenylsulfinyl)acrylamide 4

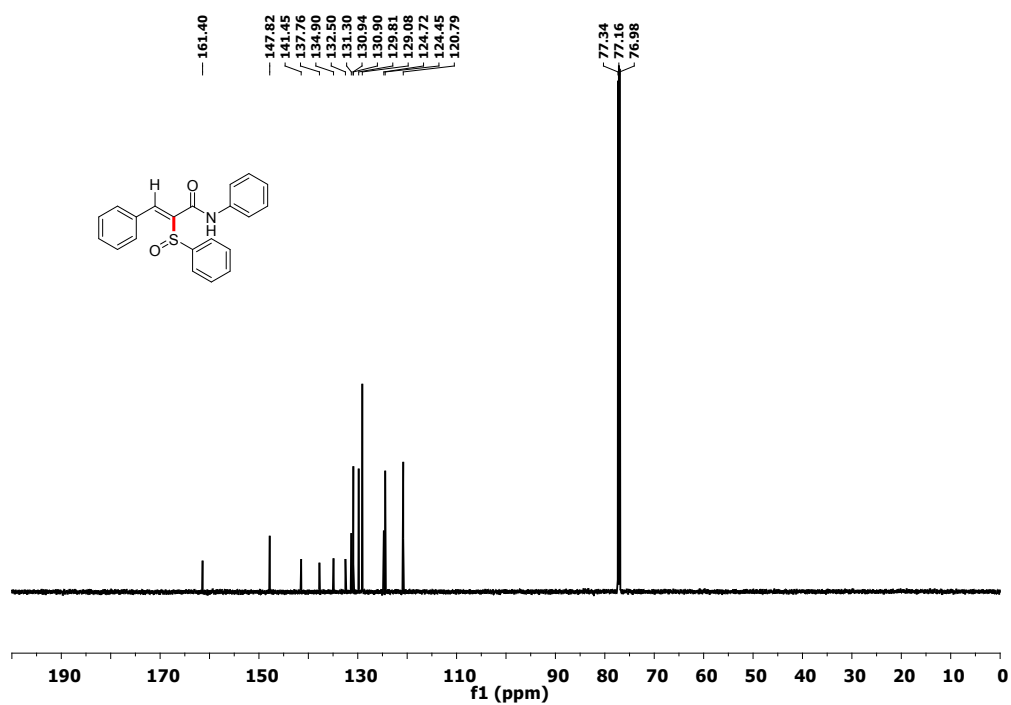

Fig. S78. <sup>13</sup>C NMR spectrum of (R,Z)-N,3-diphenyl-2-(phenylsulfinyl)acrylamide 4

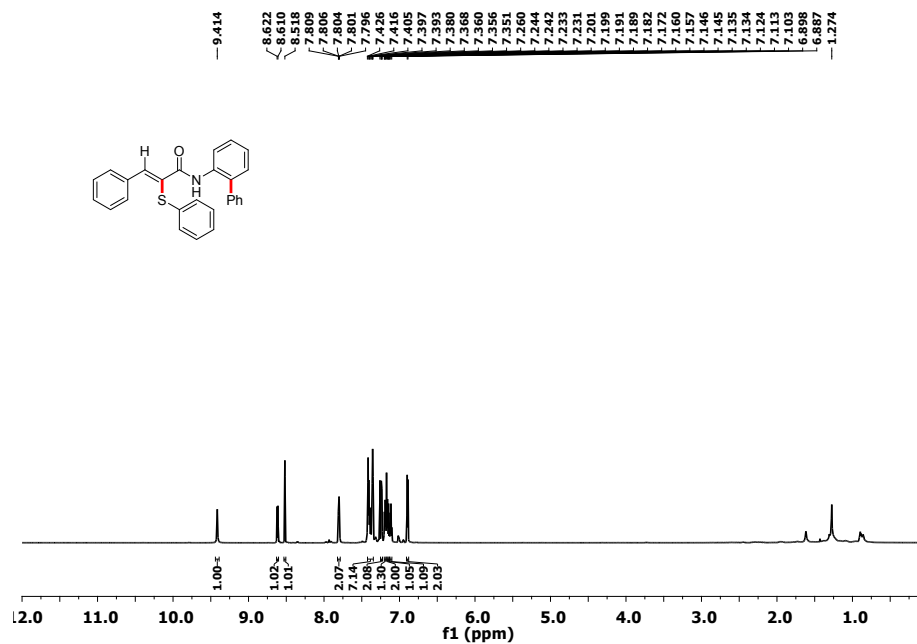

**Fig. S79.** <sup>1</sup>H NMR spectrum of (Z)-N-([1,1'-biphenyl]-2-yl)-3-phenyl-2-(phenylthio)acrylamide **5**

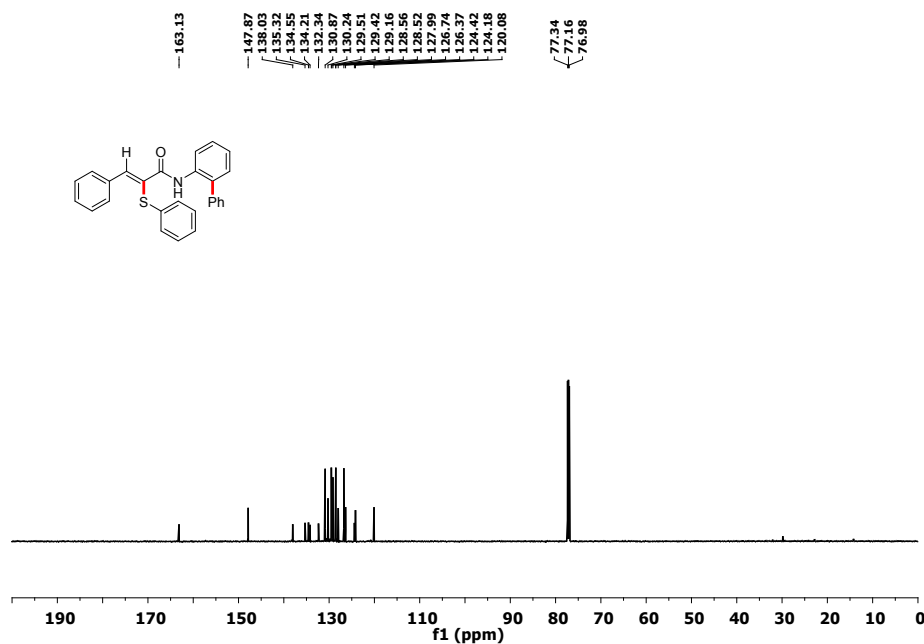

**Fig. S80.** <sup>13</sup>C NMR spectrum of (Z)-N-([1,1'-biphenyl]-2-yl)-3-phenyl-2-(phenylthio)acrylamide **5**

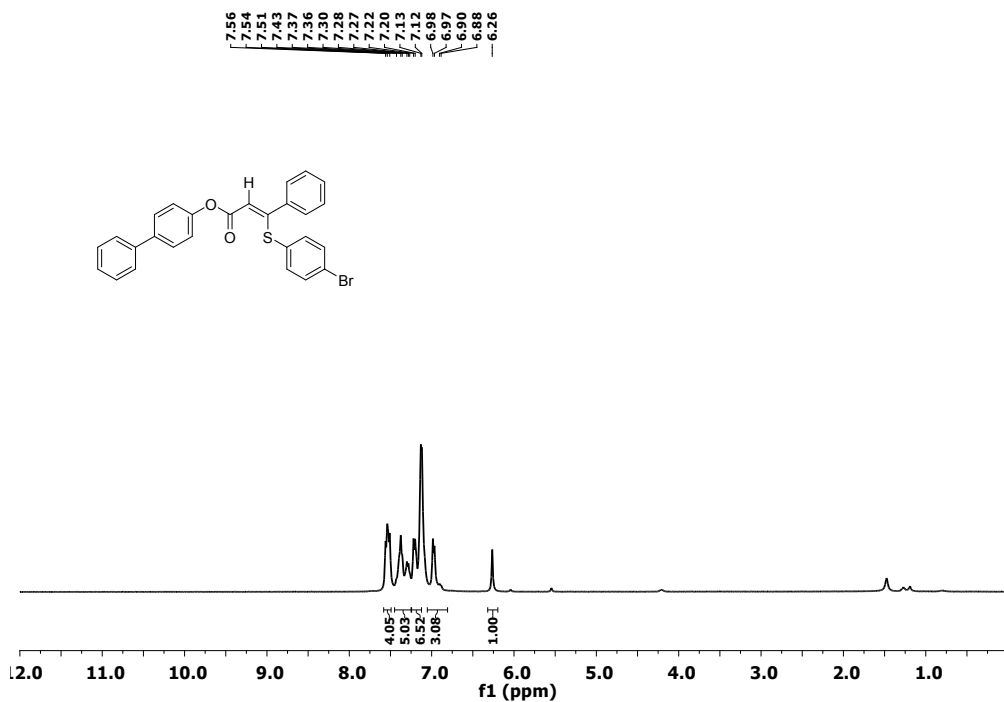

**Fig. S81.** <sup>1</sup>H NMR spectrum of [1,1'-biphenyl]-4-yl (Z)-3-((4-bromophenyl)thio)-3-phenylacrylate<sup>7</sup>

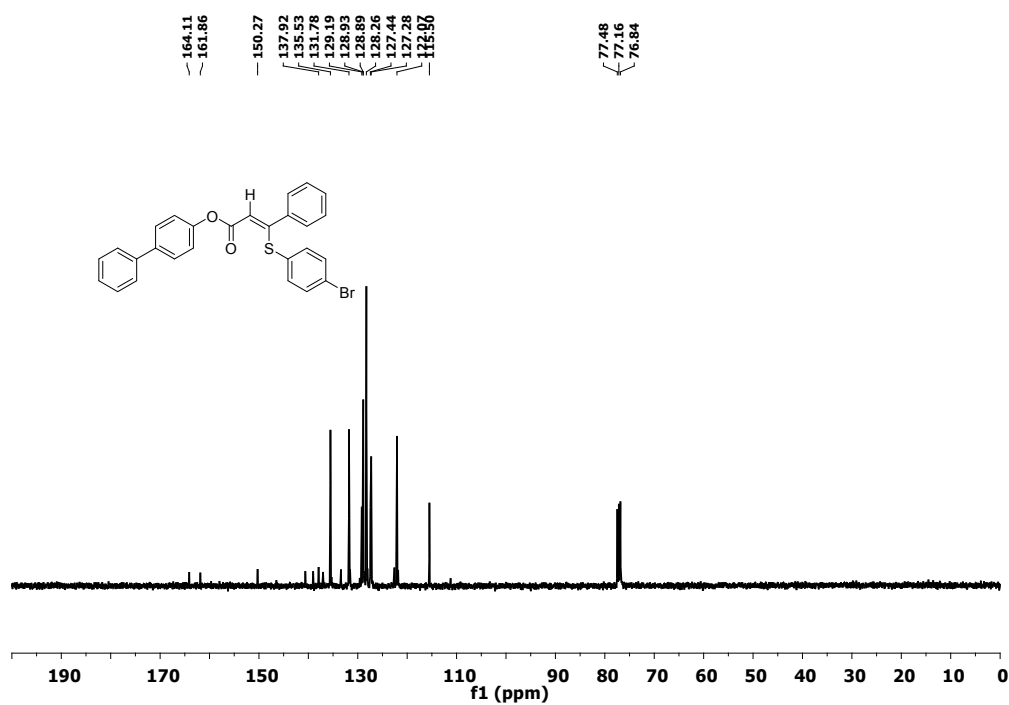

**Fig. S82.** <sup>13</sup>C NMR spectrum of [1,1'-biphenyl]-4-yl (Z)-3-((4-bromophenyl)thio)-3-phenylacrylate<sup>7</sup>

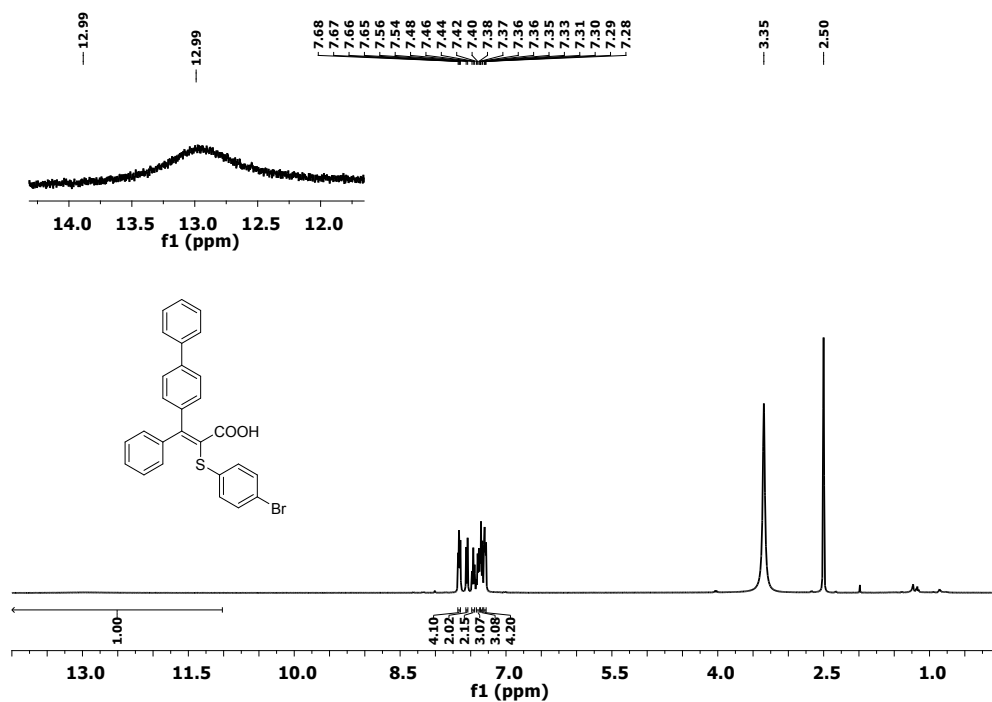

**Fig. S83.** <sup>1</sup>H NMR spectrum of (E)-3-([1,1'-biphenyl]-4-yl)-2-((4-bromophenyl)thio)-3-phenylacrylic acid **8**

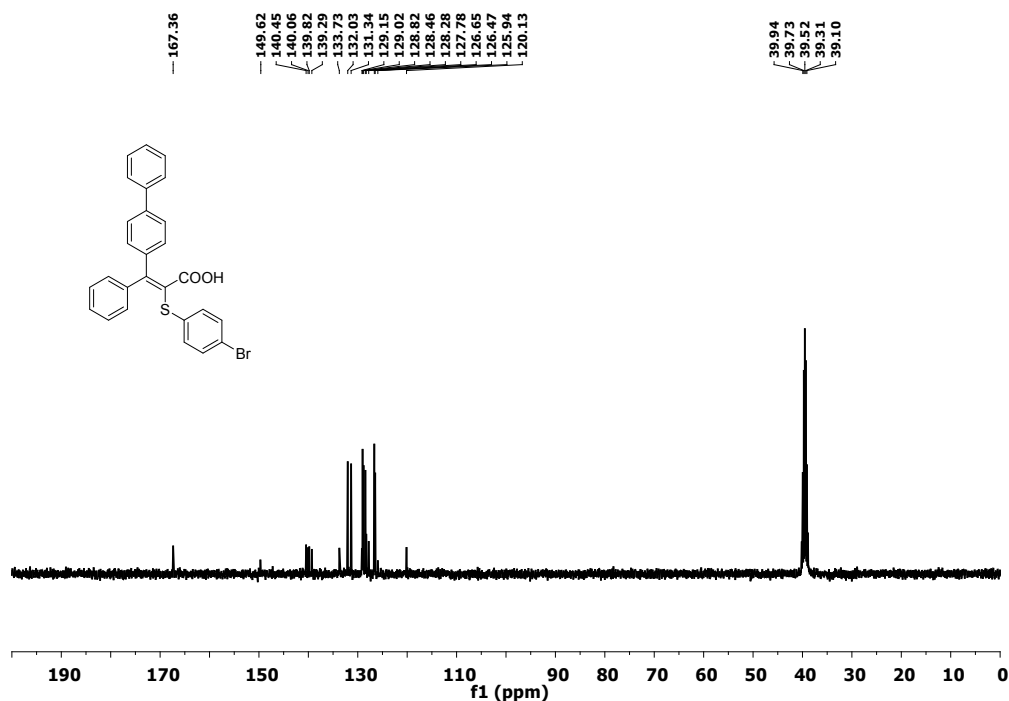

**Fig. S84.** <sup>13</sup>C NMR spectrum of (E)-3-([1,1'-biphenyl]-4-yl)-2-((4-bromophenyl)thio)-3-phenylacrylic acid **8**

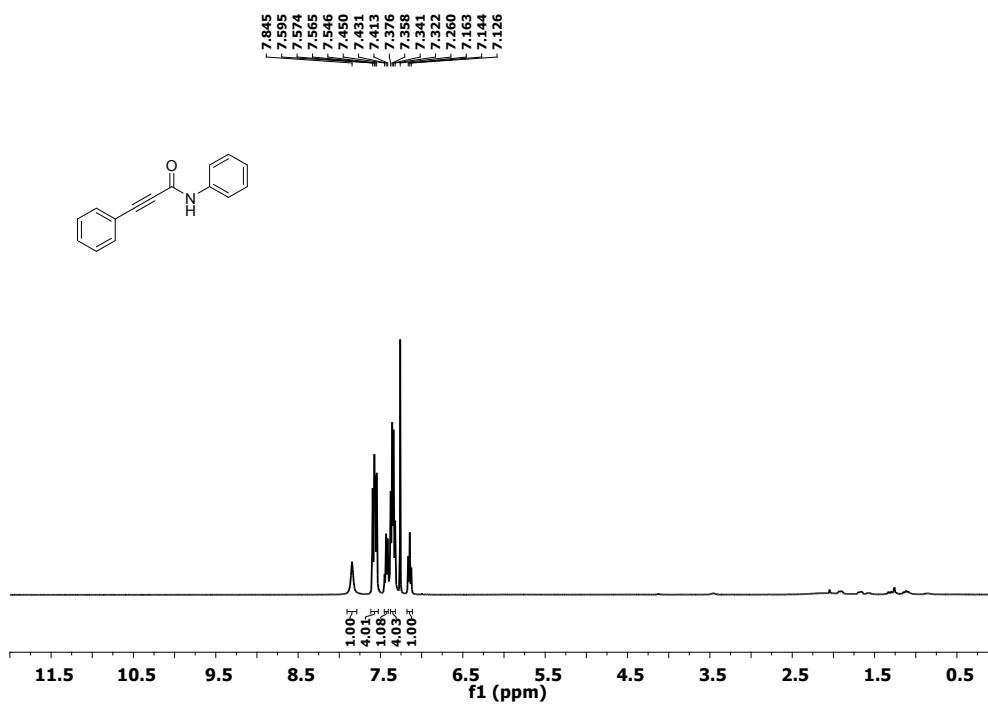

Fig. S85. <sup>1</sup>H NMR spectrum of N,3-diphenylpropiolamide **1a**

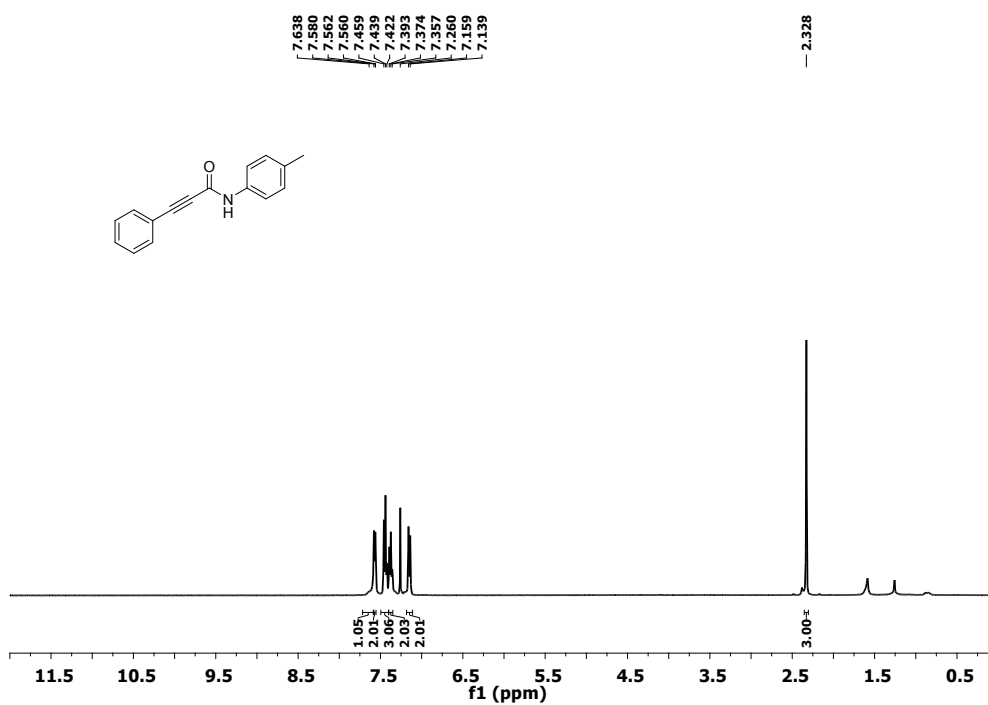

Fig. S86. <sup>1</sup>H NMR spectrum of 3-phenyl-N-(p-tolyl)propiolamide **1b**

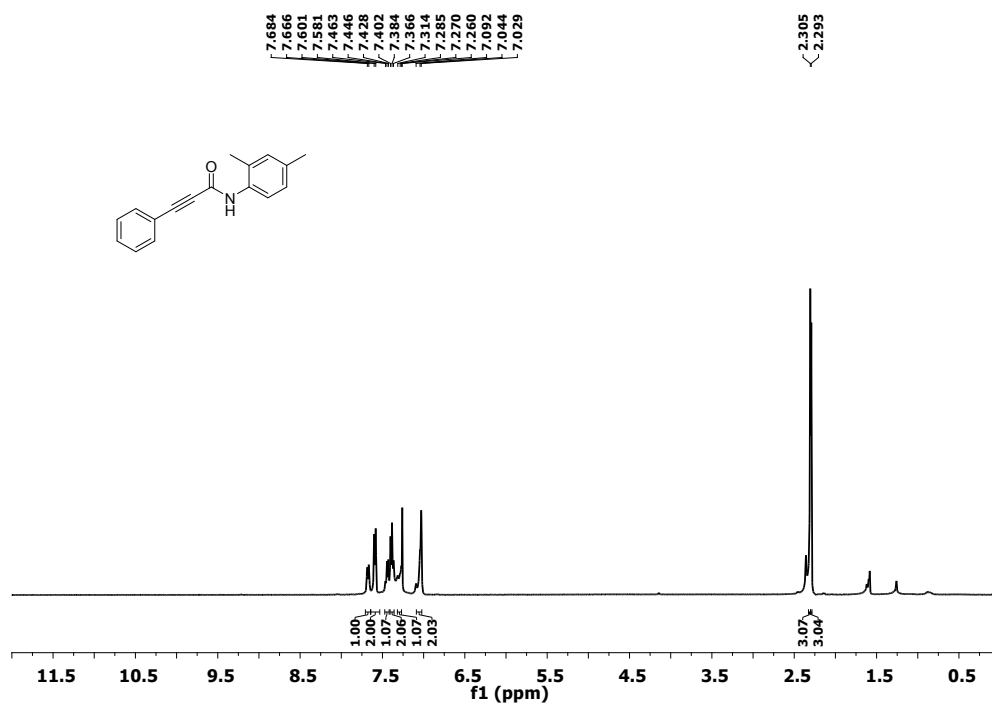

Fig. S87. <sup>1</sup>H NMR spectrum of N-(2,4-dimethylphenyl)-3-phenylpropiolamide 1c

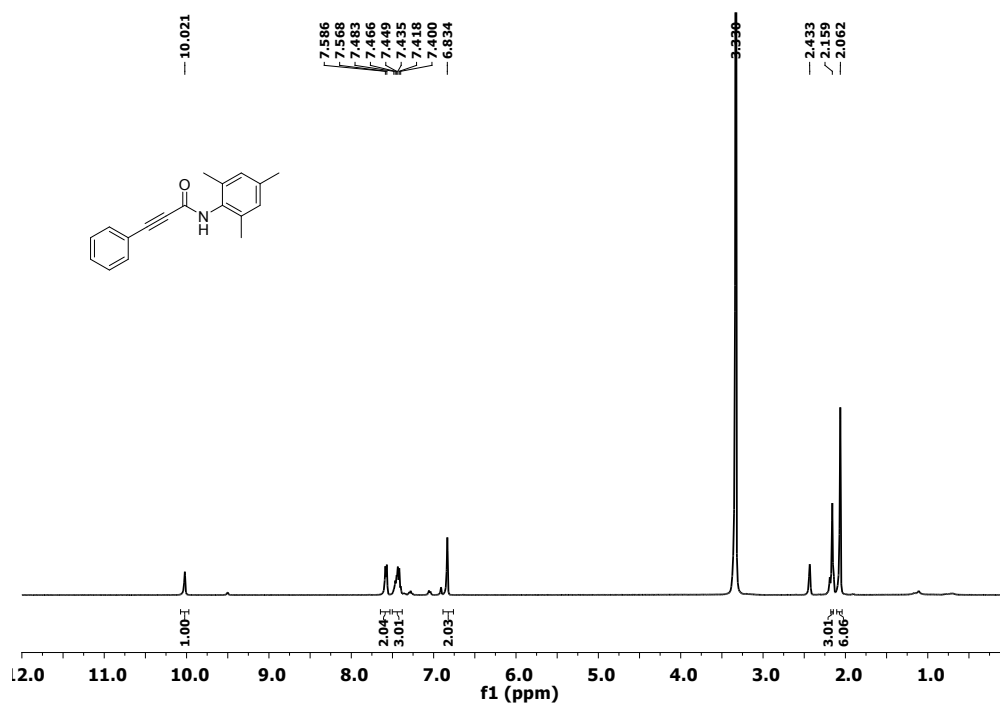

Fig. S88. <sup>1</sup>H NMR spectrum of N-mesityl-3-phenylpropiolamide 1d



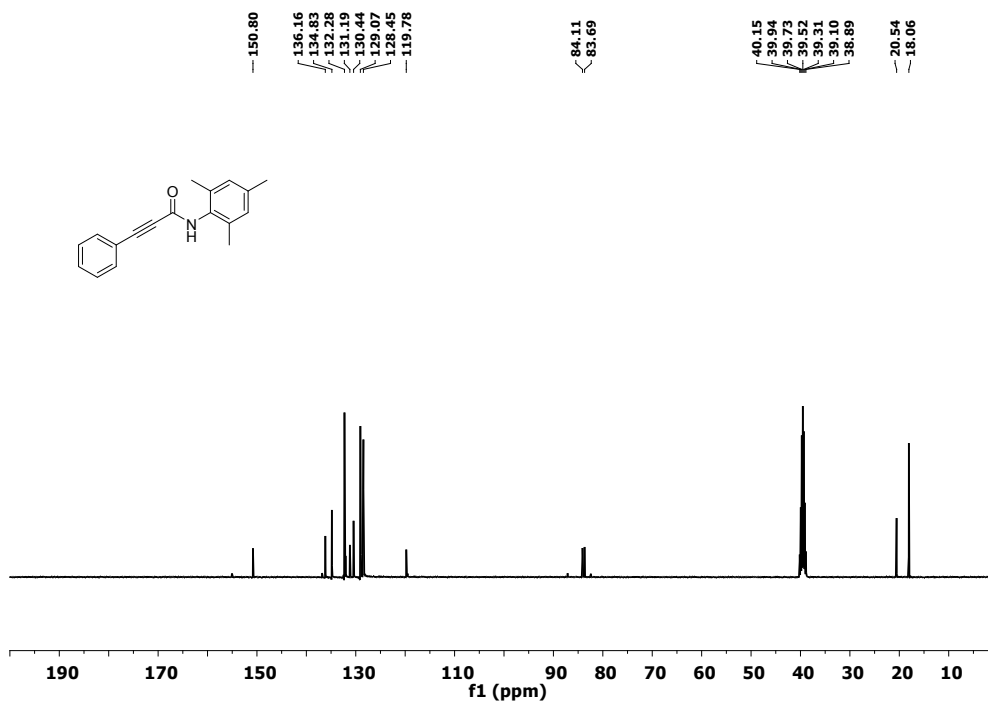

Fig. S89. <sup>13</sup>C NMR spectrum of N-mesityl-3-phenylpropiolamide **1d**

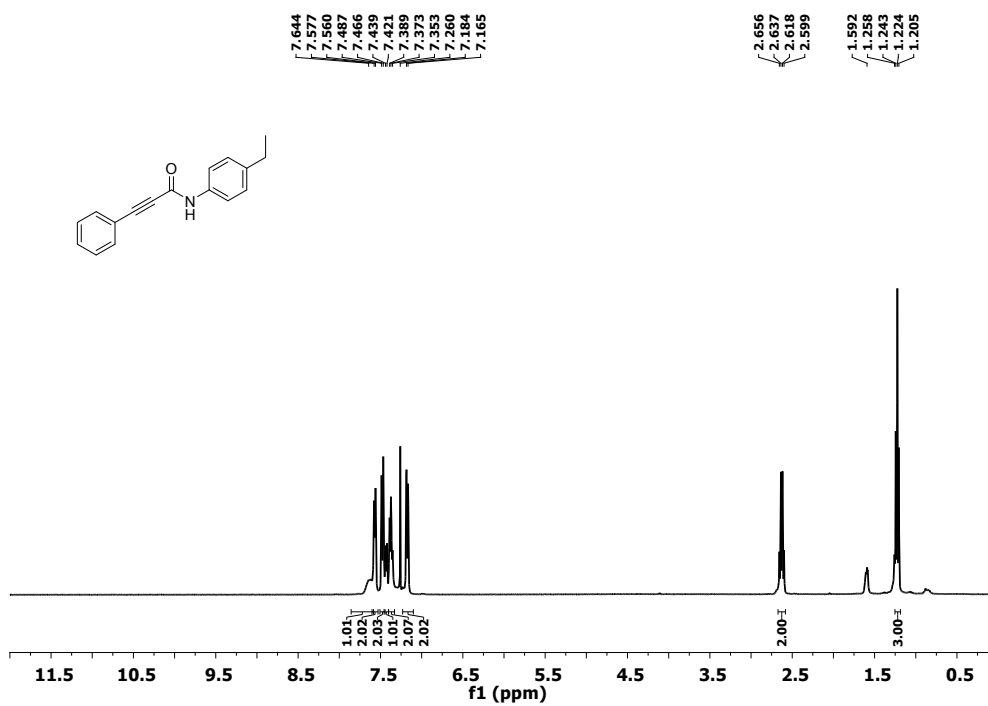

Fig. S90. <sup>1</sup>H NMR spectrum of N-(4-ethylphenyl)-3-phenylpropiolamide **1e**

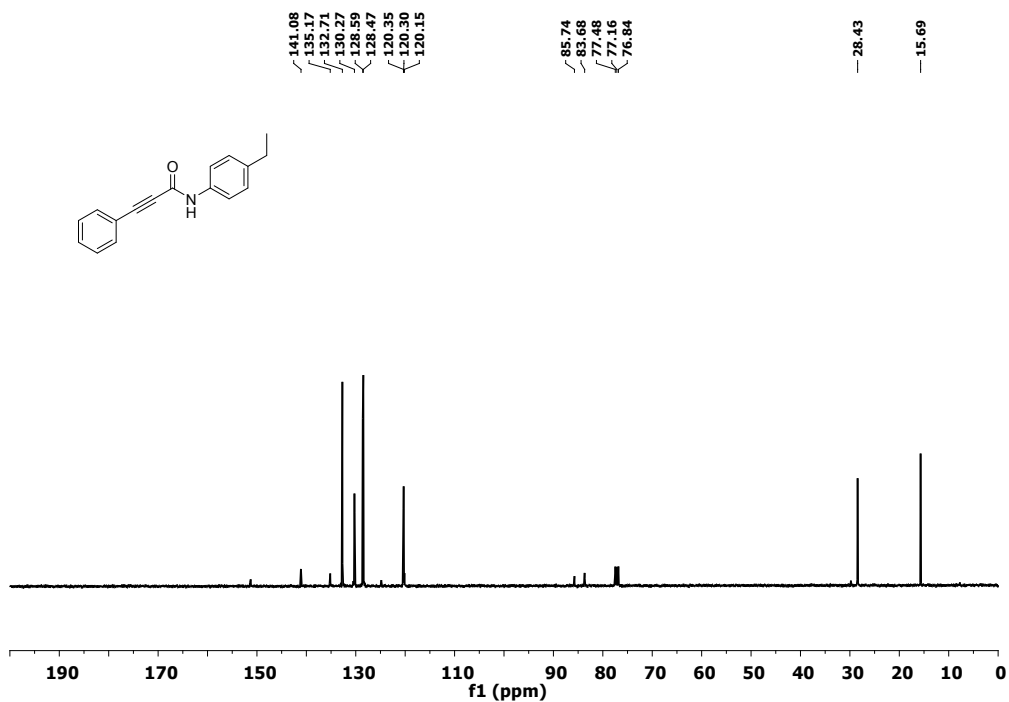

Fig. S91. <sup>13</sup>C NMR spectrum of N-(4-ethylphenyl)-3-phenylpropiolamide **1e**

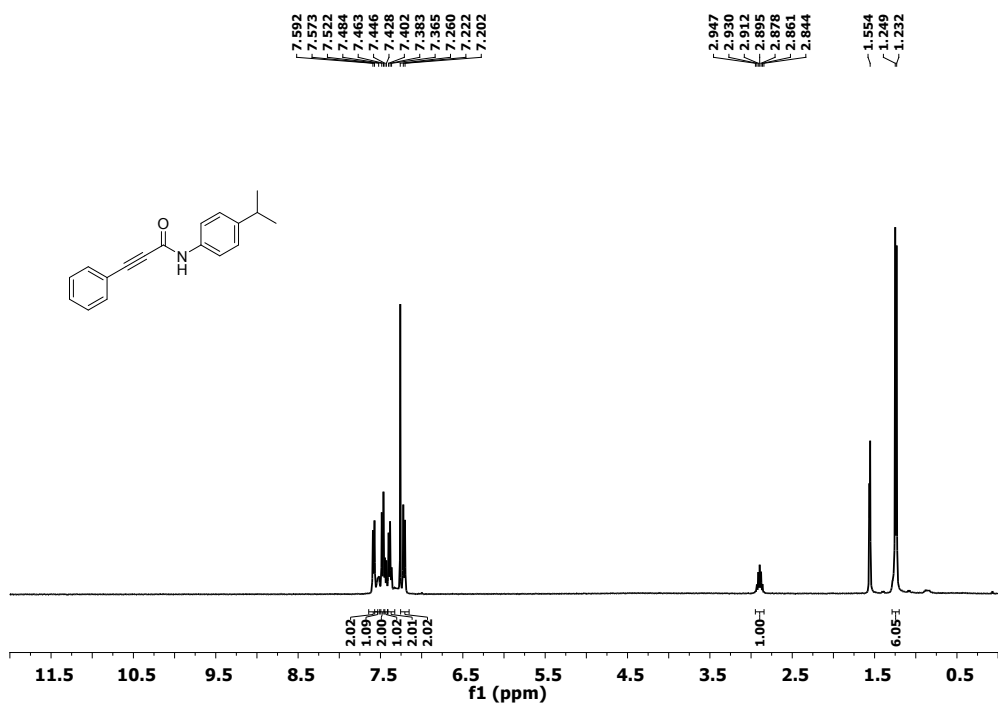

Fig. S92. <sup>1</sup>H NMR spectrum of N-(4-isopropylphenyl)-3-phenylpropiolamide **1f**

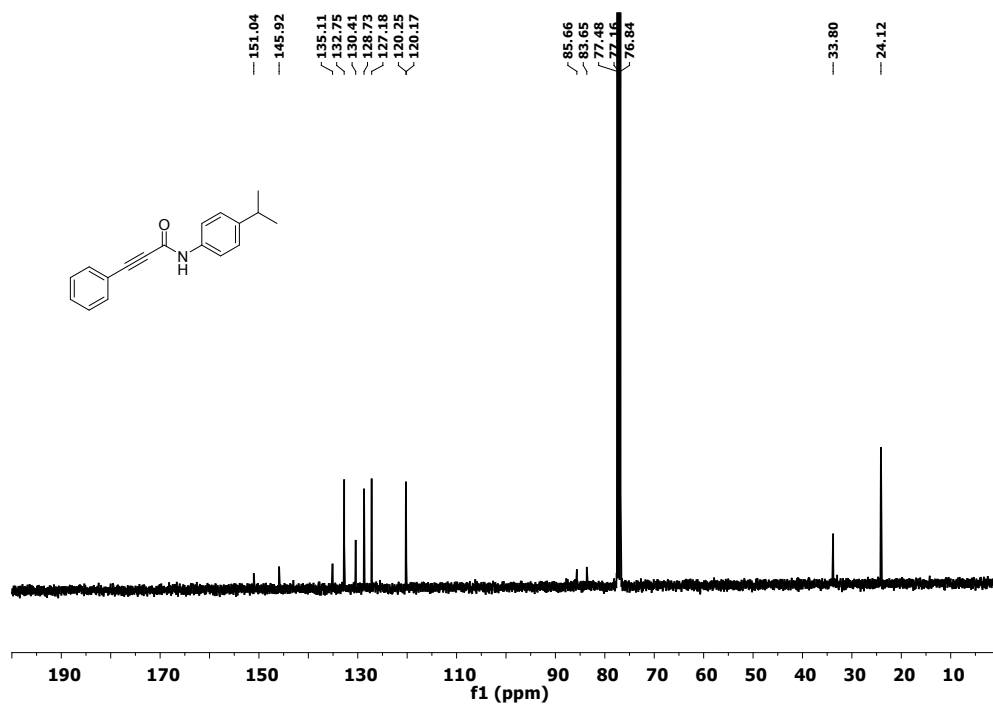

Fig. S93. <sup>13</sup>C NMR spectrum of N-(4-isopropylphenyl)-3-phenylpropiolamide 1f

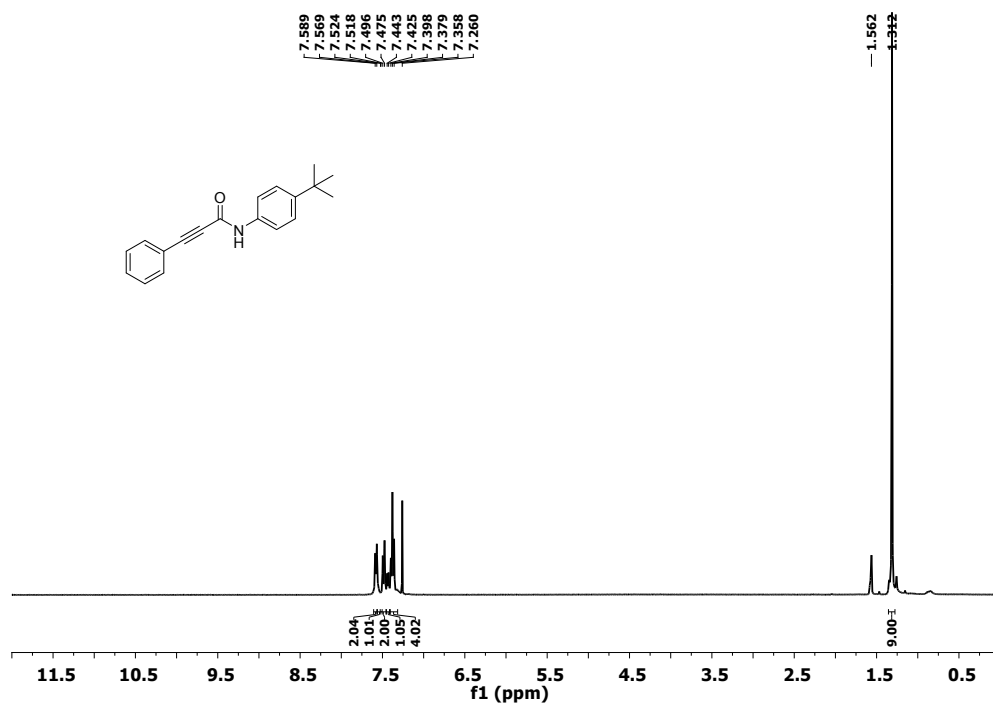

Fig. S94. <sup>1</sup>H NMR spectrum of N-(4-(tert-butyl)phenyl)-3-phenylpropiolamide 1g

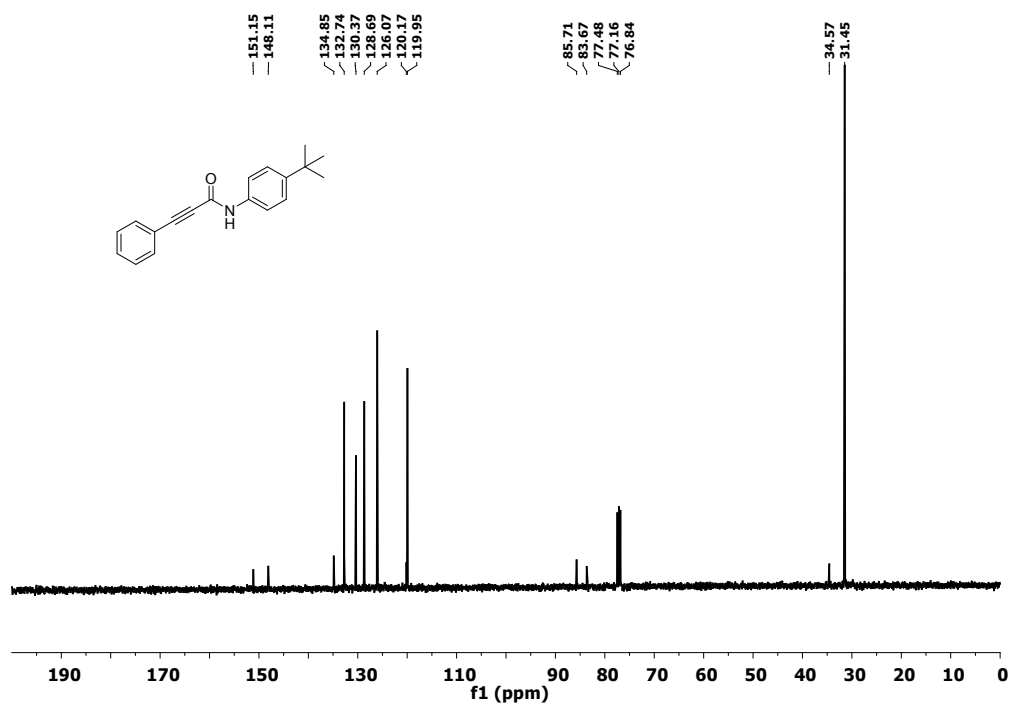

Fig. S95. <sup>13</sup>C NMR spectrum of N-(4-(tert-butyl)phenyl)-3-phenylpropiolamide **1g**

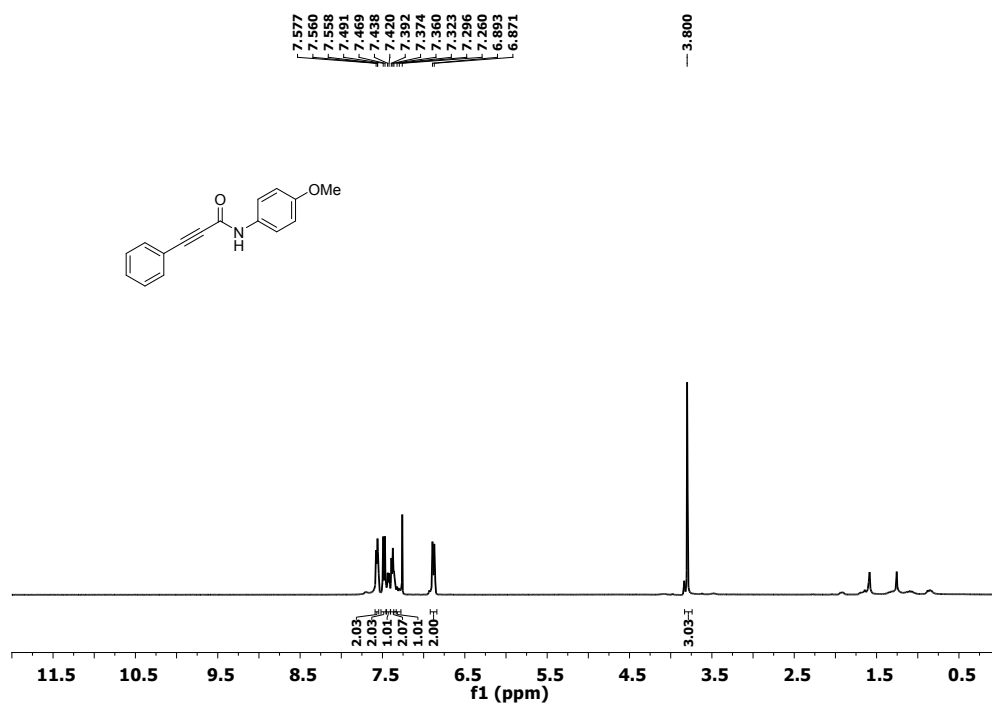

Fig. S96. <sup>1</sup>H NMR spectrum of N-(4-methoxyphenyl)-3-phenylpropiolamide **1h**

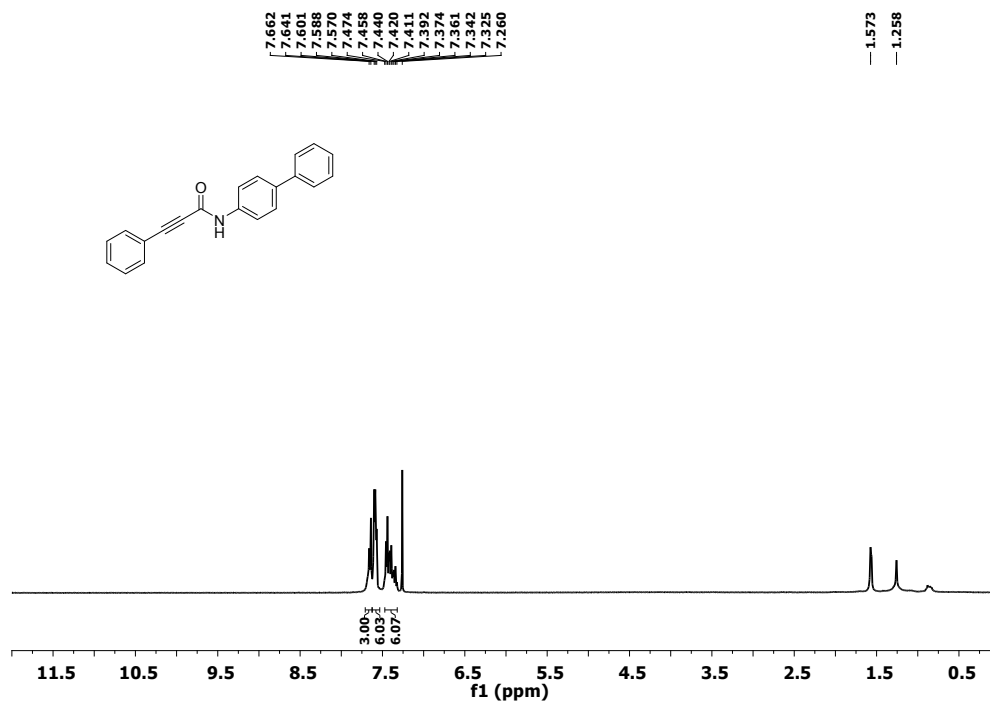

Fig. S97. <sup>1</sup>H NMR spectrum of N-([1,1'-biphenyl]-4-yl)-3-phenylpropionamide **1i**

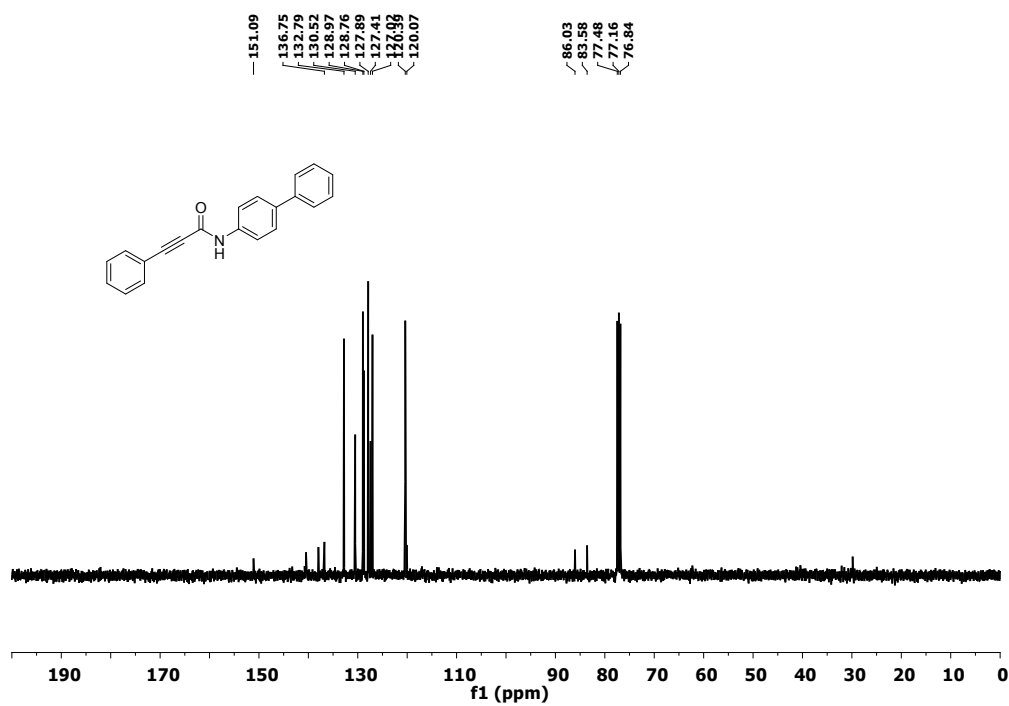

Fig. S98. <sup>13</sup>C NMR spectrum of N-([1,1'-biphenyl]-4-yl)-3-phenylpropionamide **1i**

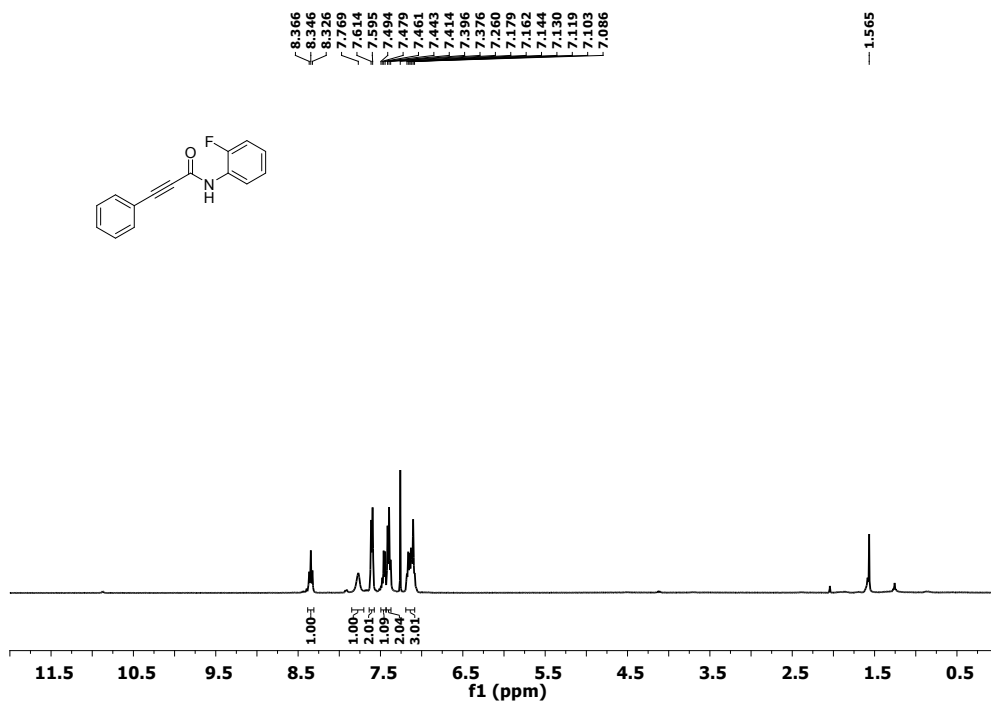

**Fig. S99.**  $^1\text{H}$  NMR spectrum of N-(2-fluorophenyl)-3-phenylpropiolamide **1j**

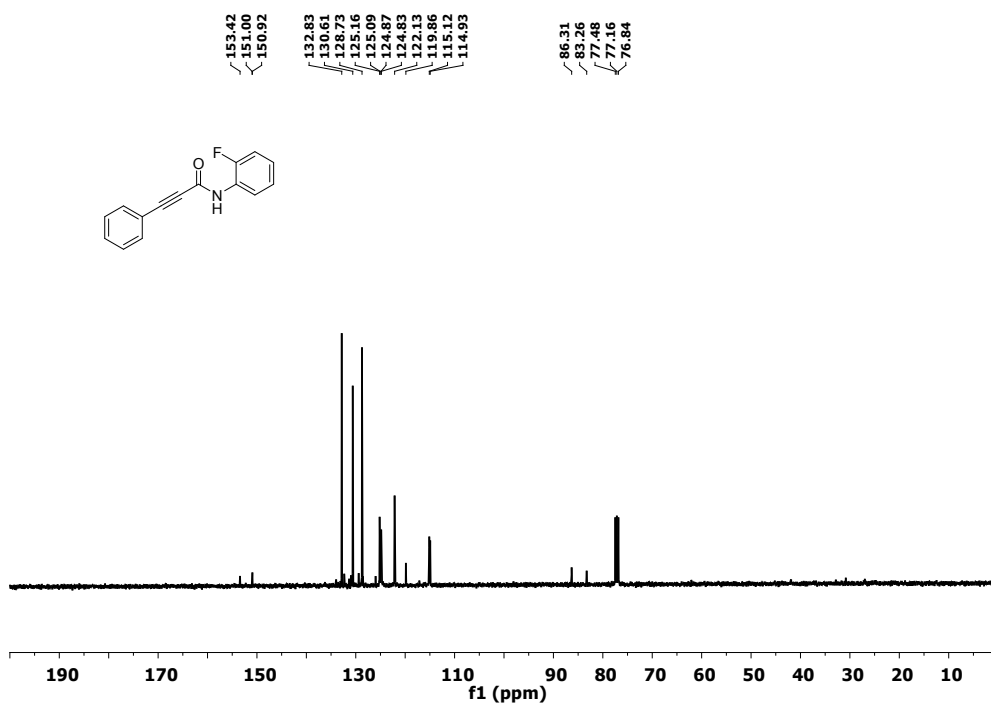

**Fig. S100.**  $^{13}\text{C}$  NMR spectrum of N-(2-fluorophenyl)-3-phenylpropiolamide **1j**

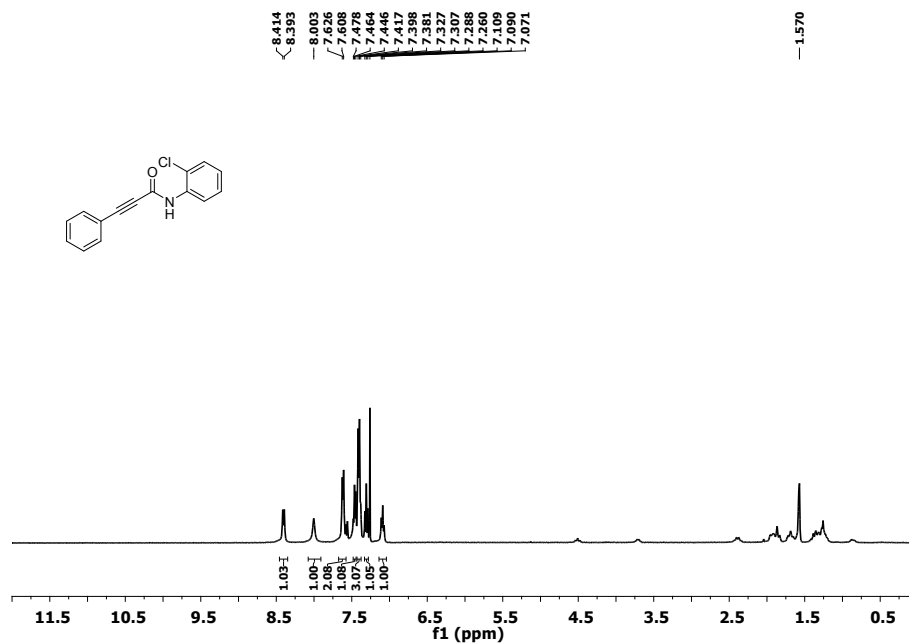

**Fig. S101.** <sup>1</sup>H NMR spectrum of N-(2-chlorophenyl)-3-phenylpropiolamide **1k**

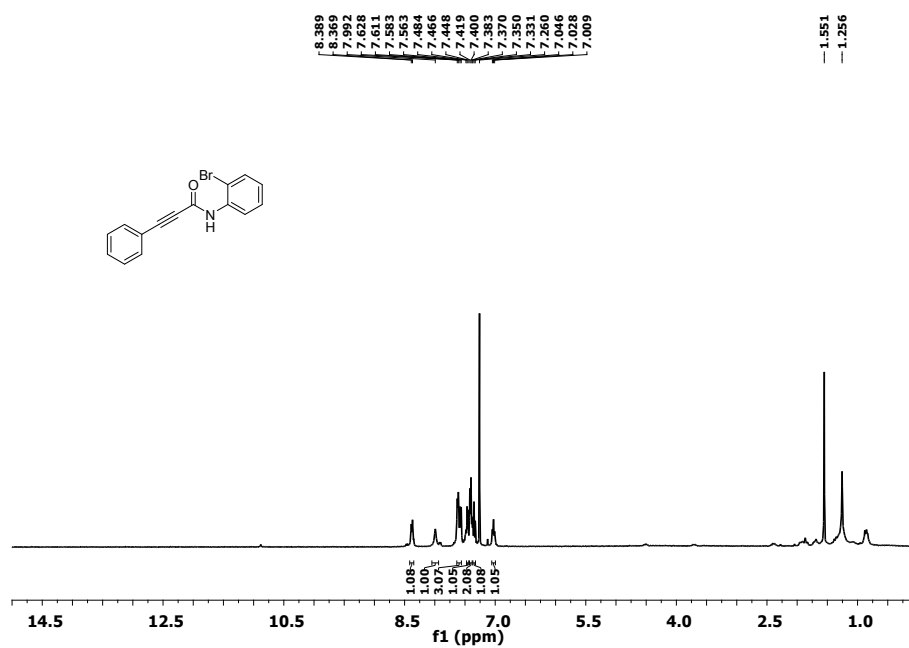

**Fig. S102.** <sup>1</sup>H NMR spectrum of N-(2-bromophenyl)-3-phenylpropiolamide **1l**

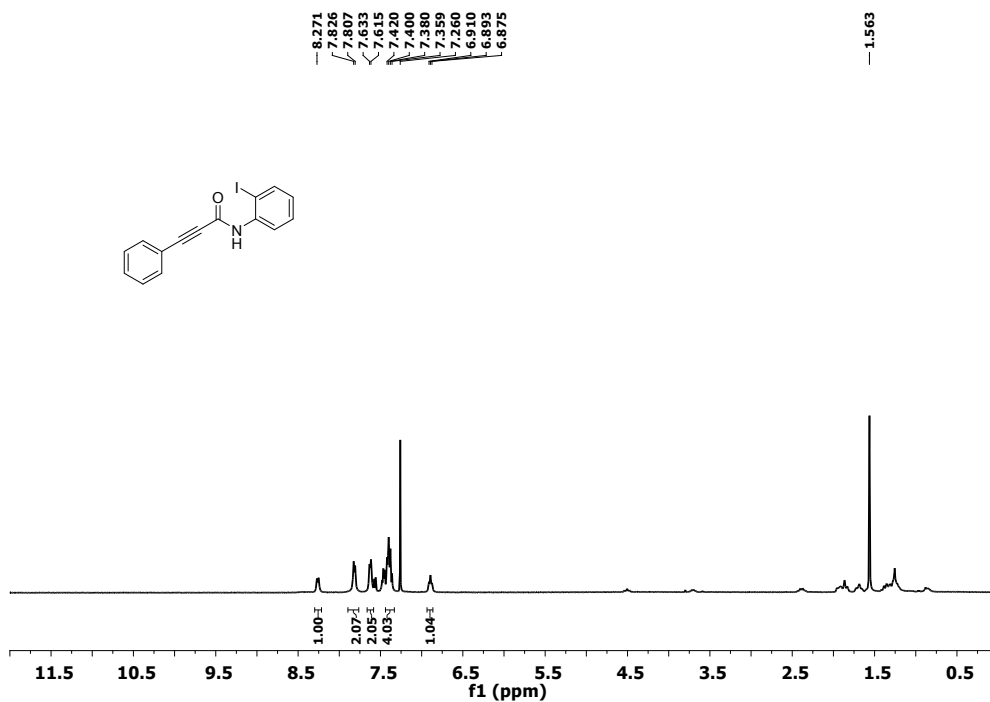

**Fig. S103.** <sup>1</sup>H NMR spectrum of N-(2-iodophenyl)-3-phenylpropiolamide **1m**

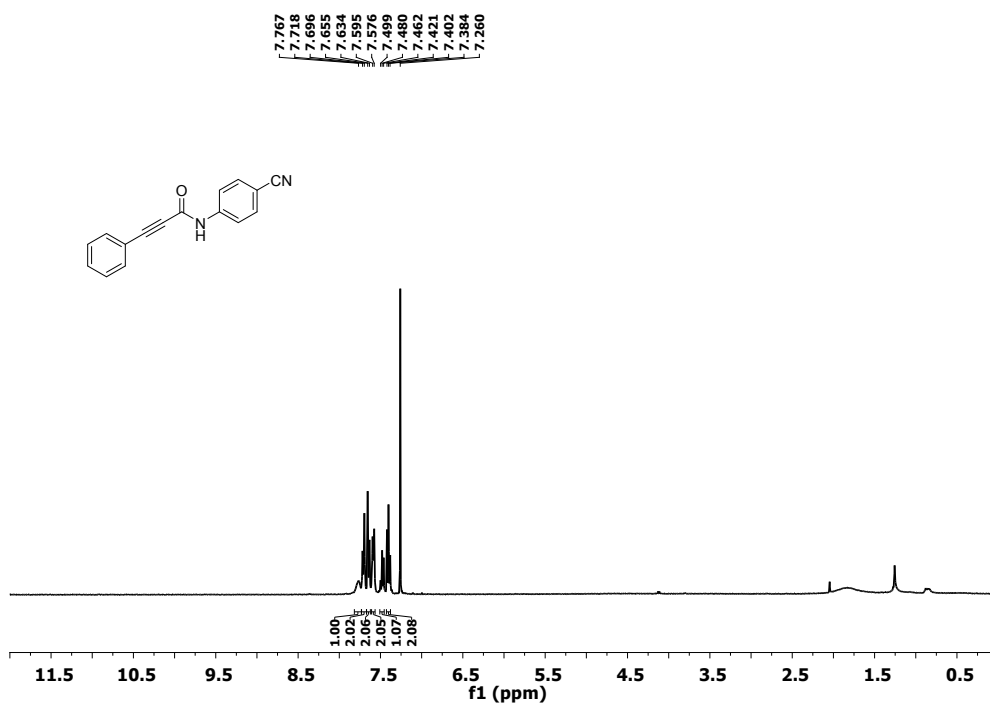

**Fig. S104.** <sup>1</sup>H NMR spectrum of N-(4-cyanophenyl)-3-phenylpropiolamide **1n**



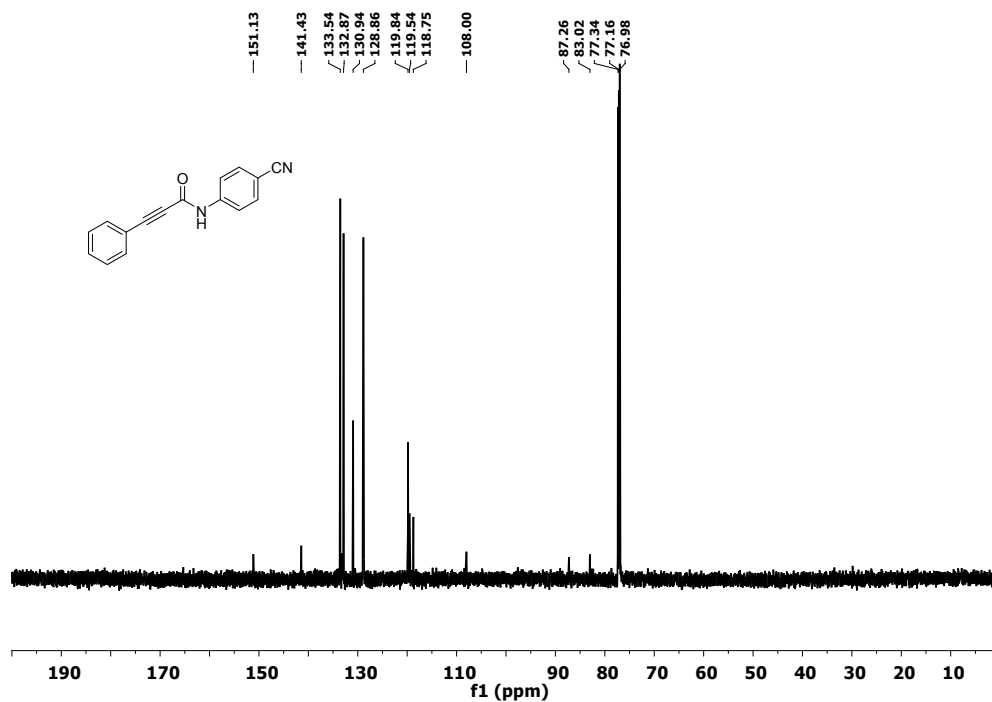

**Fig. S105.** <sup>13</sup>C NMR spectrum of N-(4-cyanophenyl)-3-phenylpropiolamide **1n**

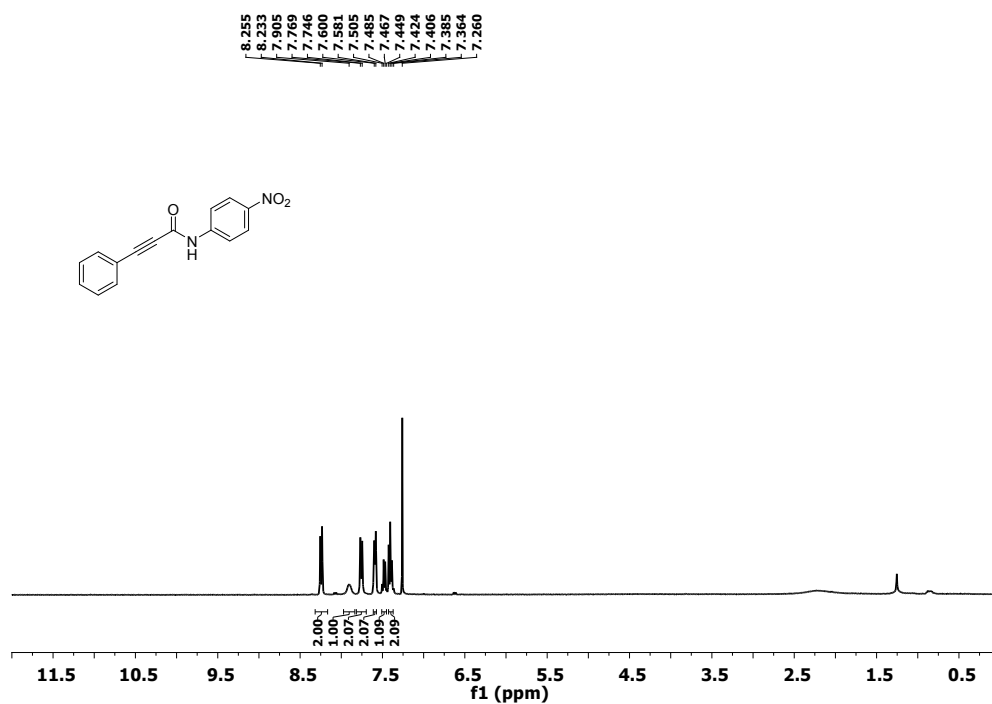

**Fig. S106.** <sup>1</sup>H NMR spectrum of N-(4-nitrophenyl)-3-phenylpropiolamide **1o**

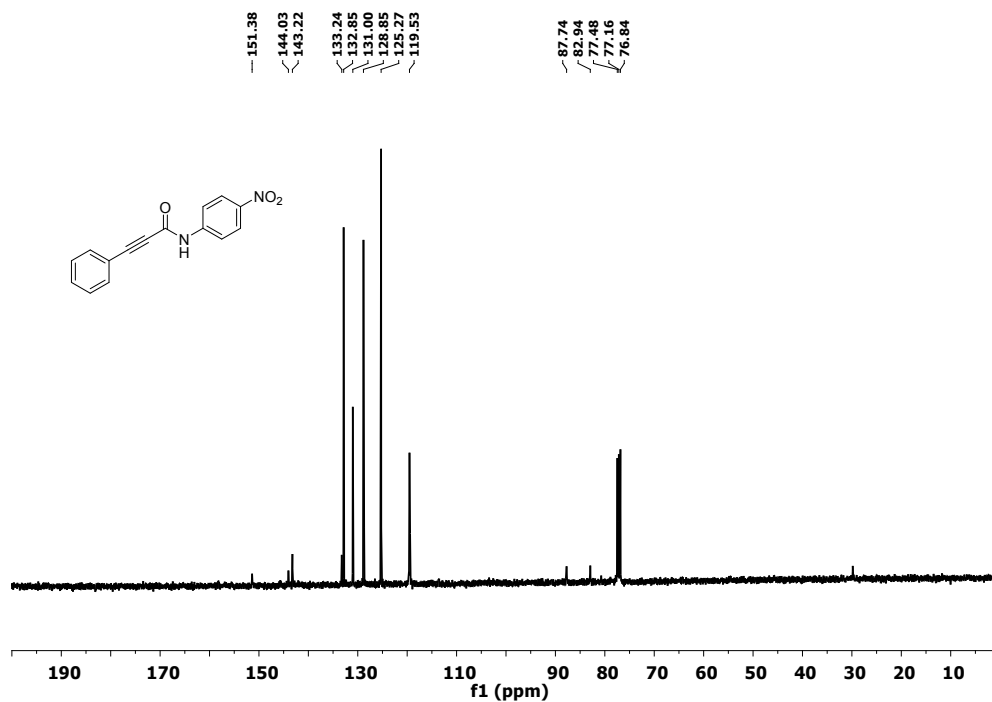

Fig. S107. <sup>13</sup>C NMR spectrum of N-(4-nitrophenyl)-3-phenylpropiolamide **1o**

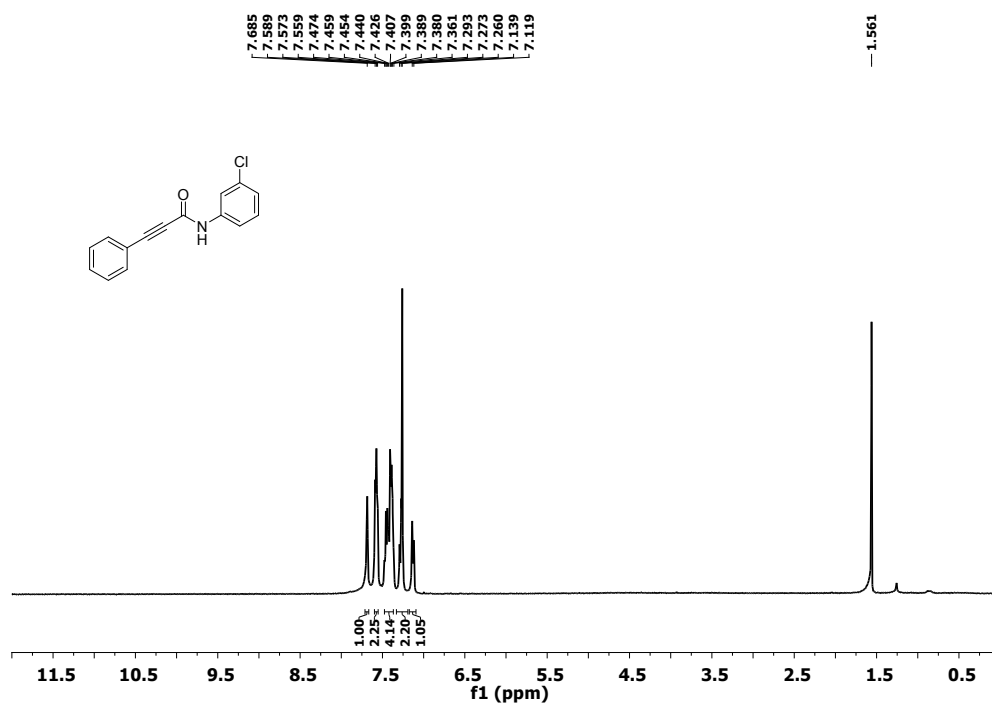

Fig. S108. <sup>1</sup>H NMR spectrum of N-(3-chlorophenyl)-3-phenylpropiolamide **1p**

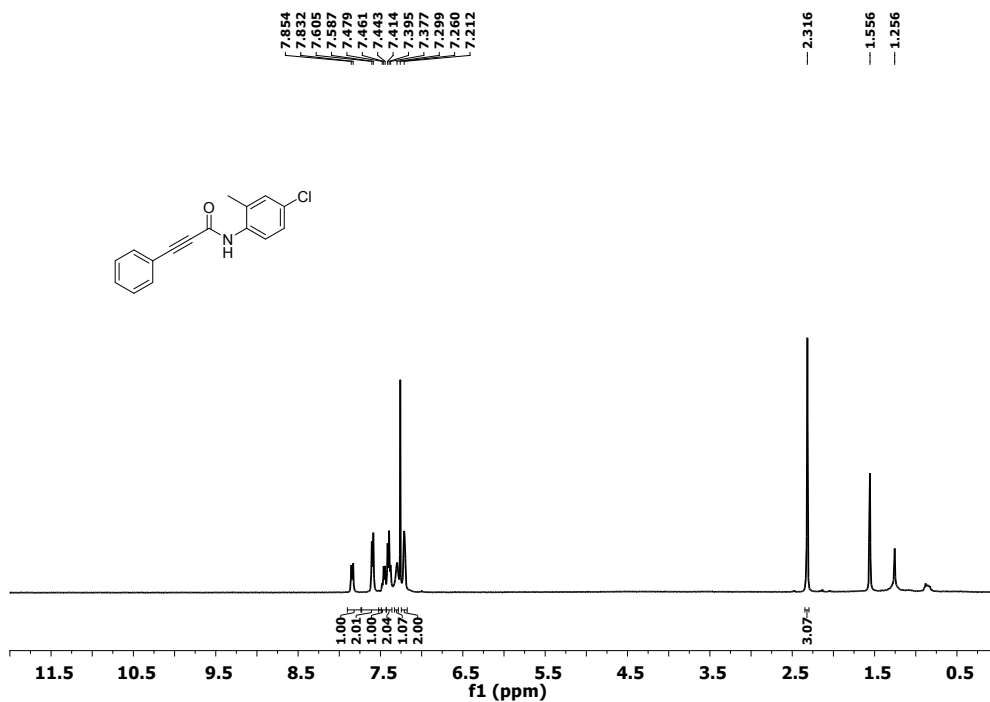

**Fig. S109.**  $^1\text{H}$  NMR spectrum of N-(4-chloro-2-methylphenyl)-3-phenylpropiolamide **1q**

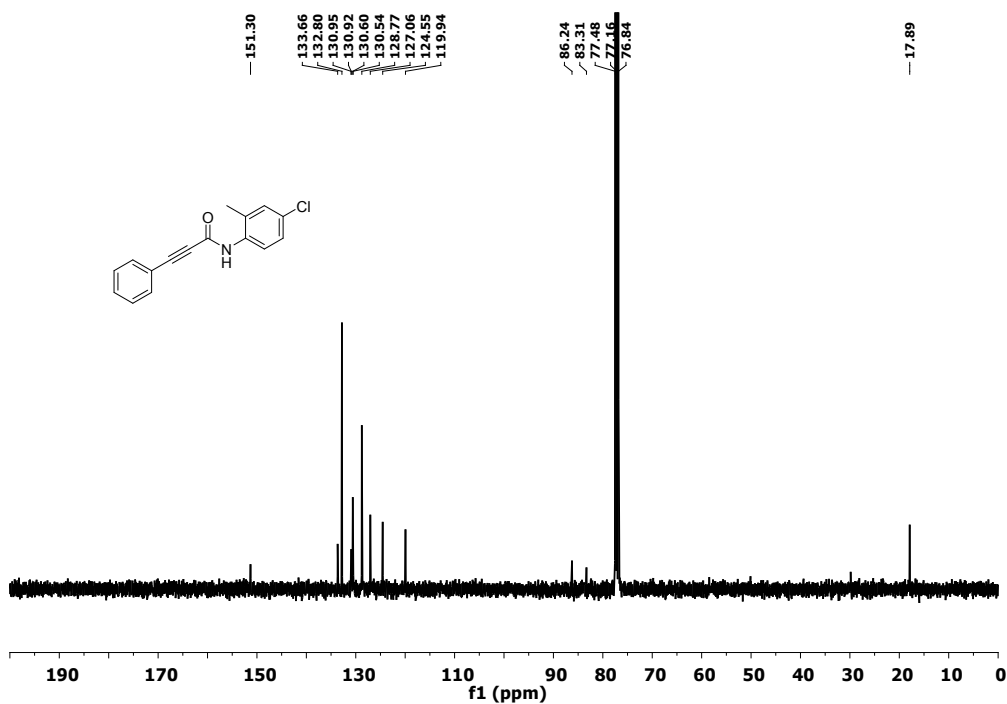

**Fig. S110.**  $^{13}\text{C}$  NMR spectrum of N-(4-chloro-2-methylphenyl)-3-phenylpropiolamide **1q**

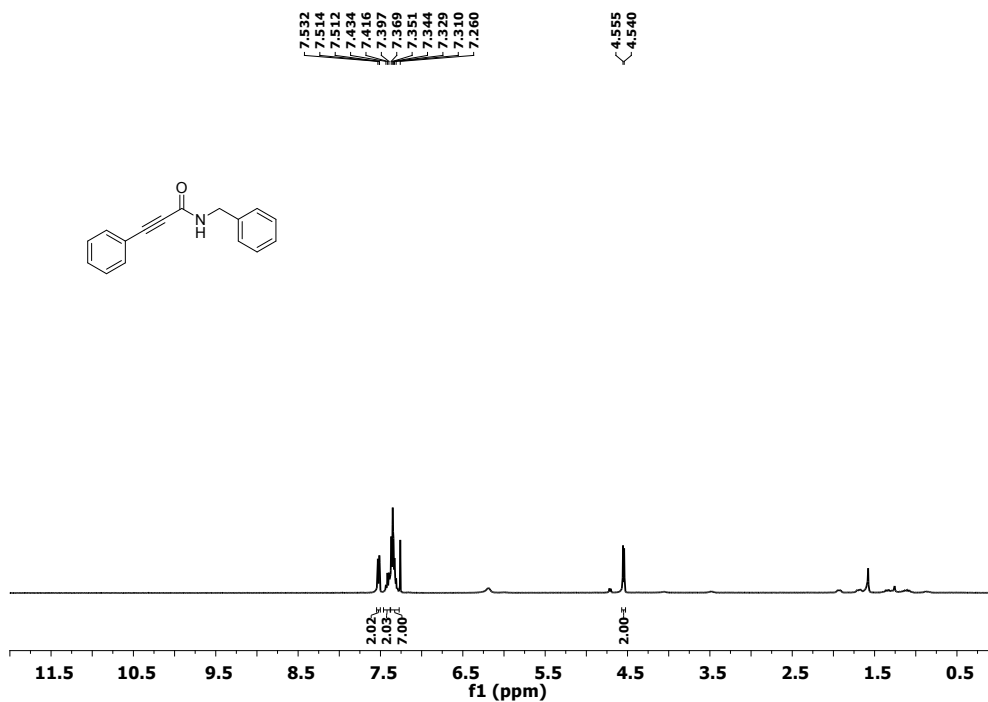

Fig. S111. <sup>1</sup>H NMR spectrum of N-benzyl-3-phenylpropiolamide 1r

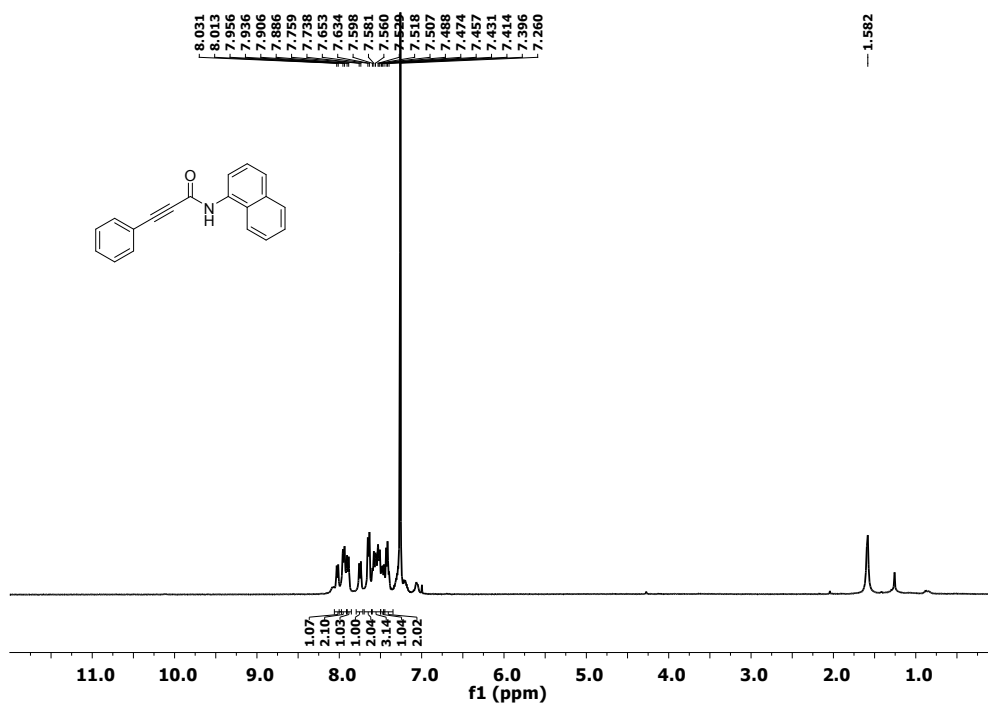

Fig. S112. <sup>1</sup>H NMR spectrum of N-(naphthalen-1-yl)-3-phenylpropiolamide 1s

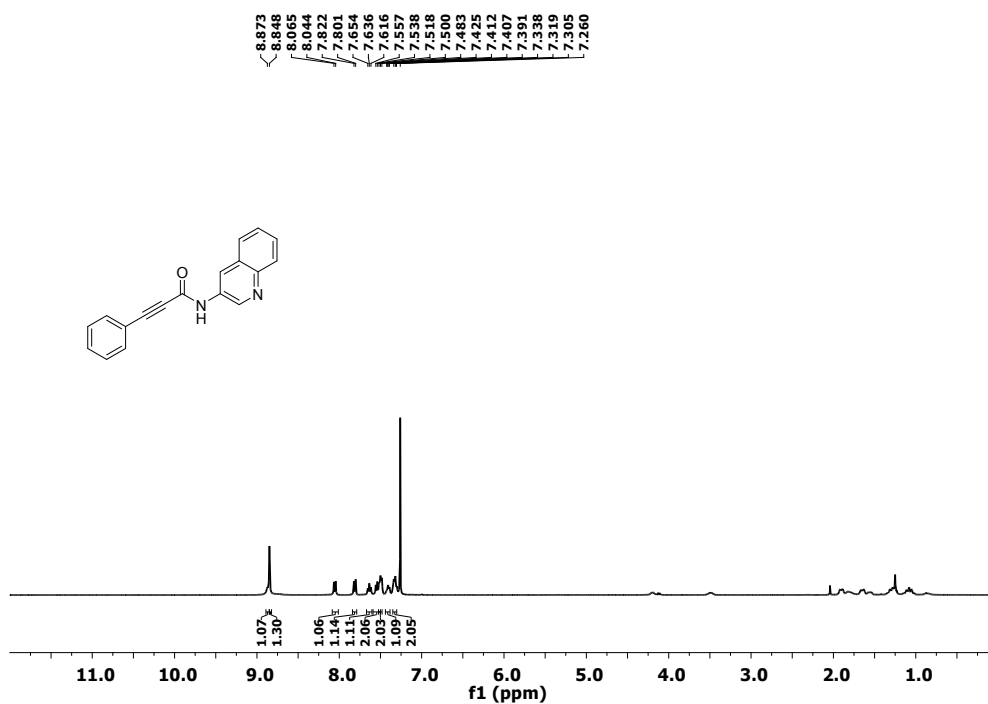

Fig. S113. <sup>1</sup>H NMR spectrum of 3-phenyl-N-(quinolin-3-yl)propiolamide **1t**

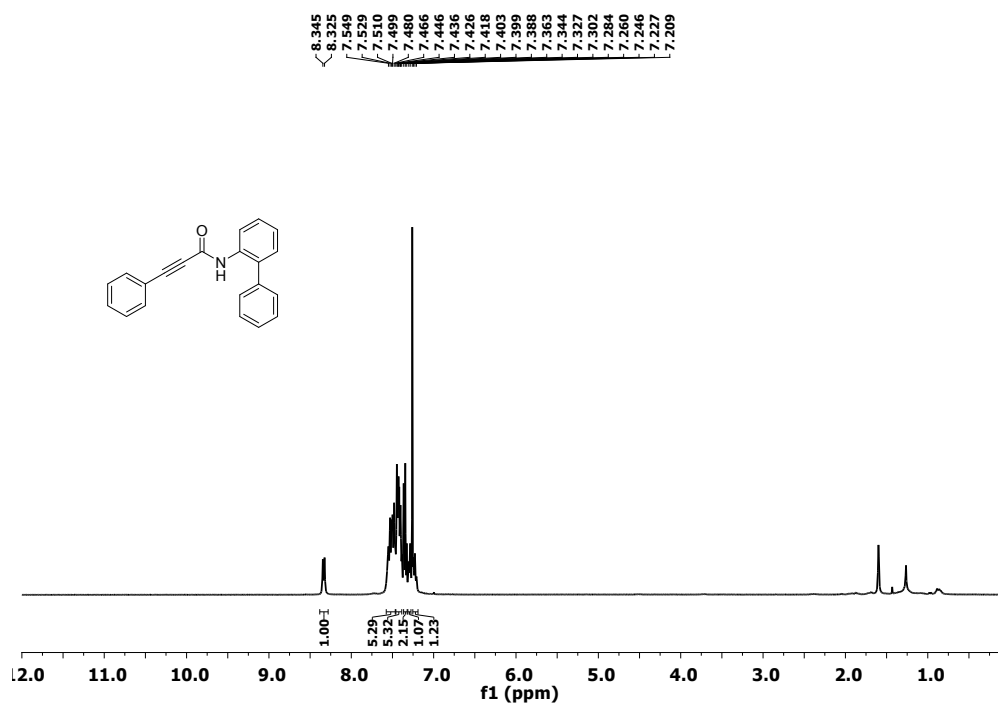

Fig. S114. <sup>1</sup>H NMR spectrum of N-([1,1'-biphenyl]-2-yl)-3-phenylpropiolamide **1u**

## Reaction of Compound 11 and 2a.

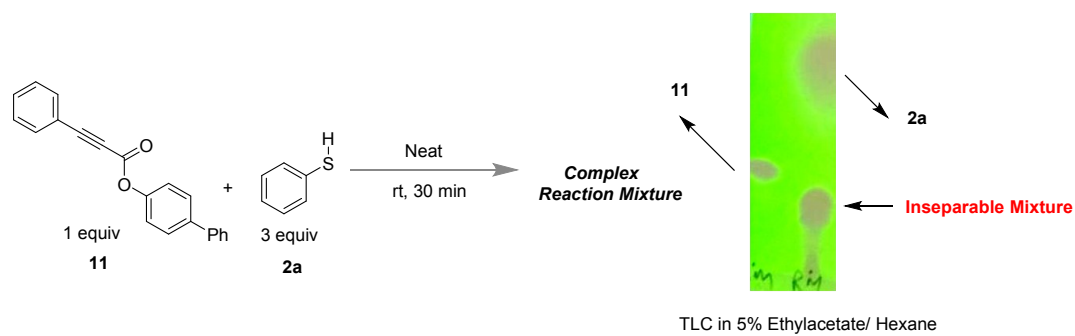

Scheme S2.

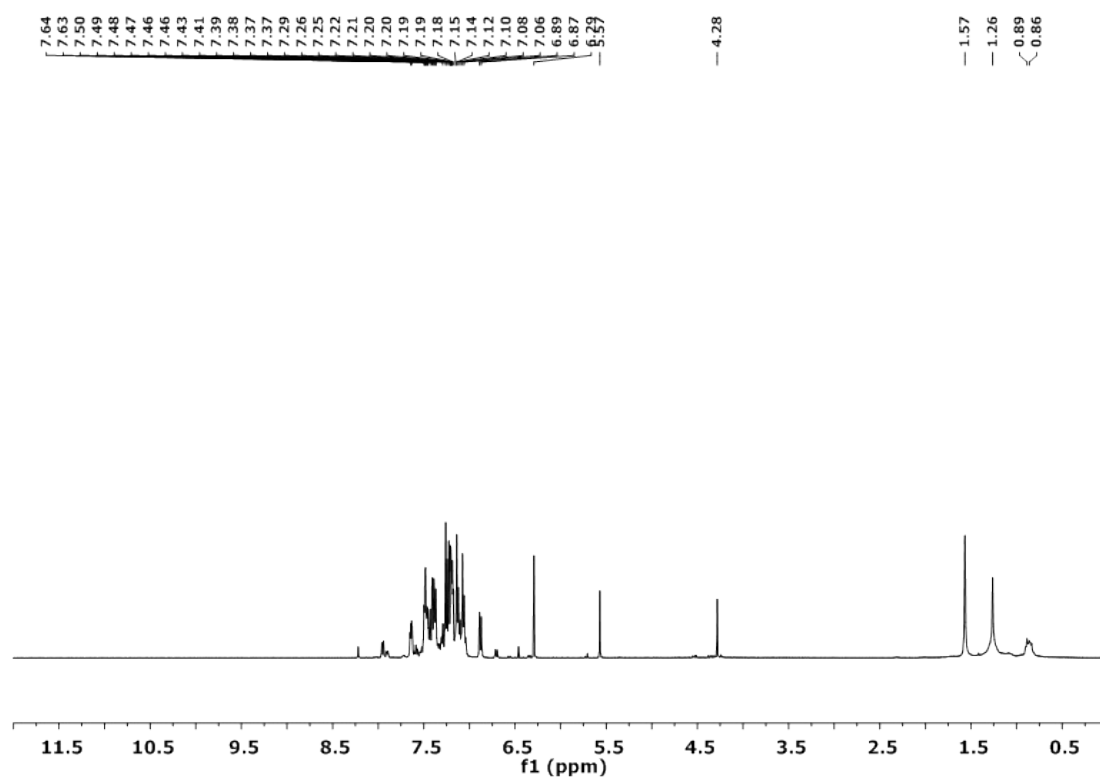

Fig. S115. <sup>1</sup>H NMR spectrum of inseparable reaction mixture of phenyl 3-phenylpropionate **6** and thiophenol **2a**

### Reaction of compound 1a and 2a

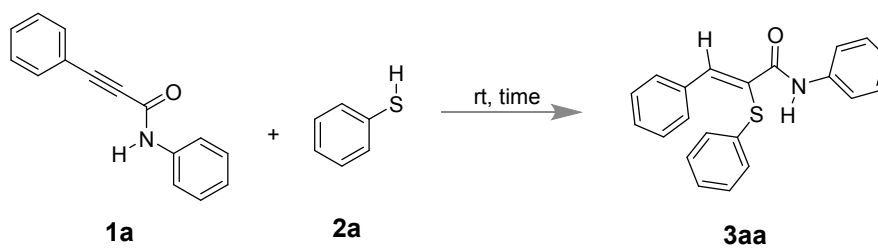

Scheme S3.

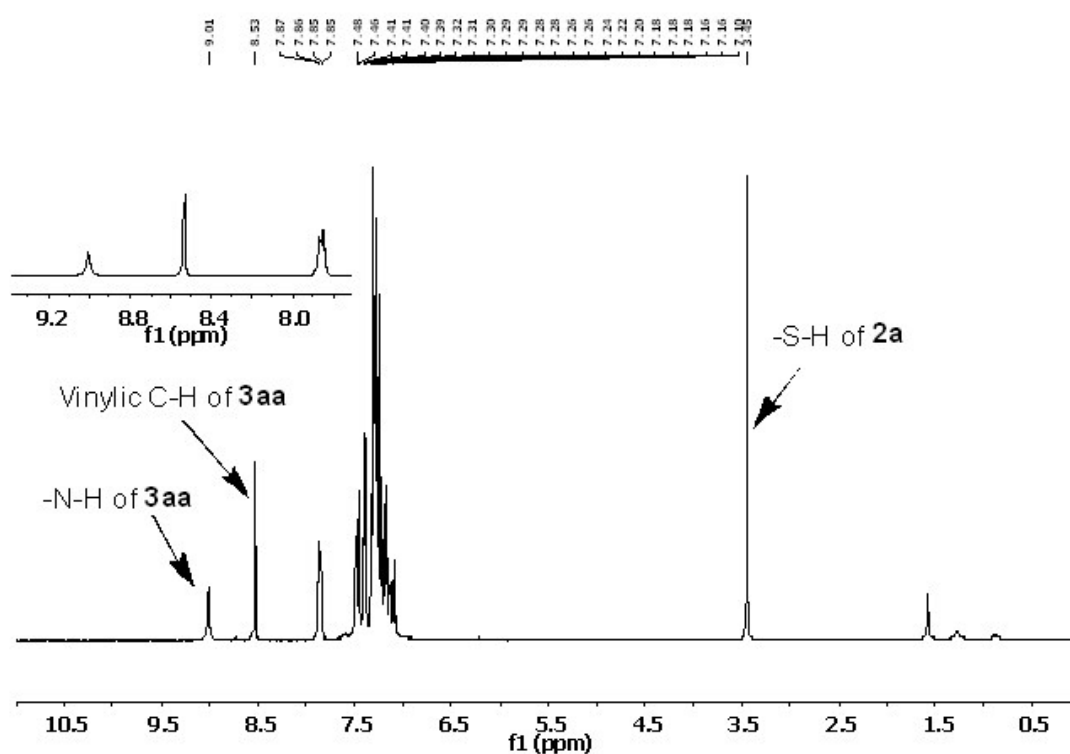

Fig. S117. <sup>1</sup>H NMR spectrum of crude reaction mixture of phenyl 3-phenylpropiolamide **1a** and thiophenol **2a**

### Reaction of Compound 1a and 2k.

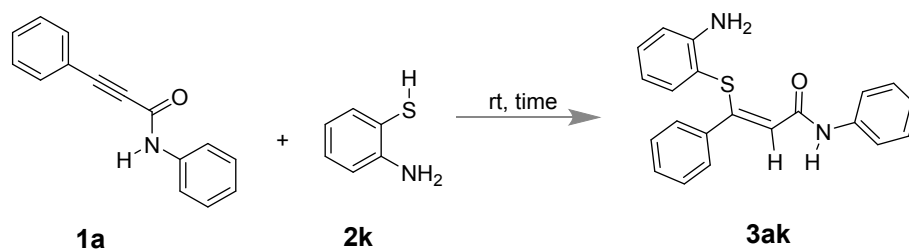

Scheme S4.

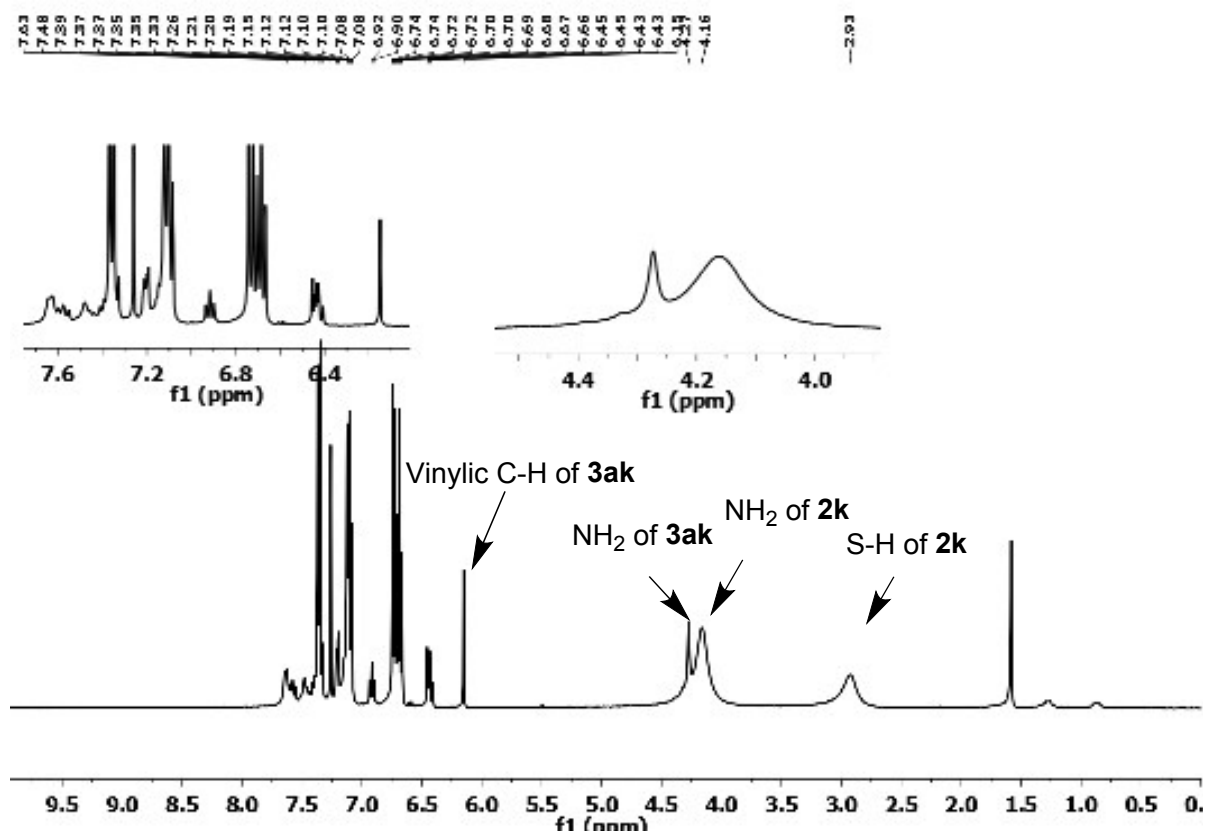

Fig. S118. <sup>1</sup>H NMR spectrum of crude reaction mixture of phenyl 3-phenylpropionamide **1a** and 2-amino thiophenol **2k**
